# Supplementary material for: Hydrogen atom transfer-assisted dearomative ipso -annulation of N -benzylacrylamides to azaspirocycles
Source: Royal Society of Chemistry journal article supplement (doi:10.1039/d5ob01337b), 2025-01-01

## **Supporting Information**

### **Hydrogen Atom Transfer-Assisted Dearomative *ipso*-Annulation of *N*-Benzylacrylamides to Azaspirocycles**

Chada Raji Reddy, <sup>a\*</sup> Dharani Pulukuri, <sup>a</sup> and Ankita Kumari<sup>a</sup>

<sup>a</sup>Department of Organic Synthesis & Process Chemistry, CSIR-Indian Institute of Chemical  
Technology (CSIR-IICT), Hyderabad 500007, India

E-mail: [rajireddy@iict.res.in](mailto:rajireddy@iict.res.in)

#### **Table of Contents**

|    |                                                                |        |
|----|----------------------------------------------------------------|--------|
| 1. | Figure S1: Structures of starting materials used in this study | S2     |
| 2. | <sup>1</sup> H NMR and <sup>13</sup> C NMR spectra             | S3-S46 |

**Figure S1: Structures of starting materials used in this study**

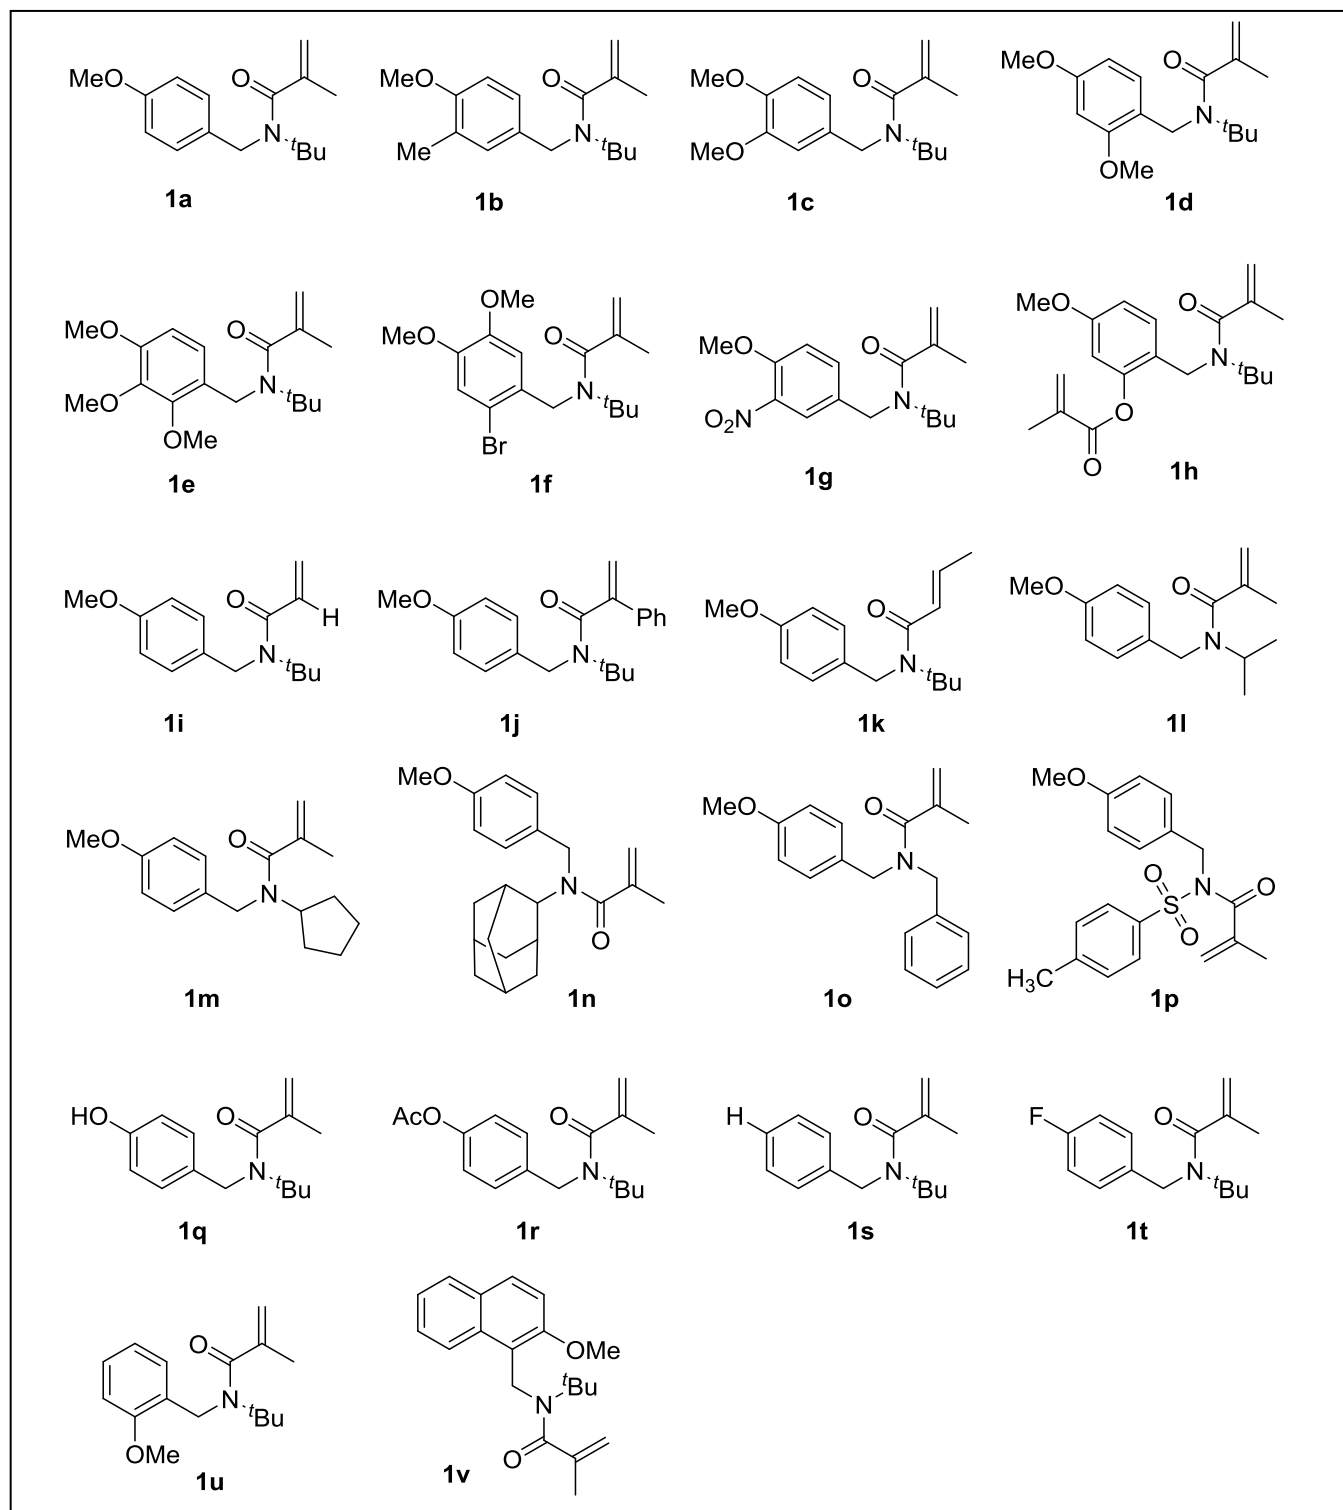

## 2. $^1\text{H}$ NMR and $^{13}\text{C}$ NMR spectra:

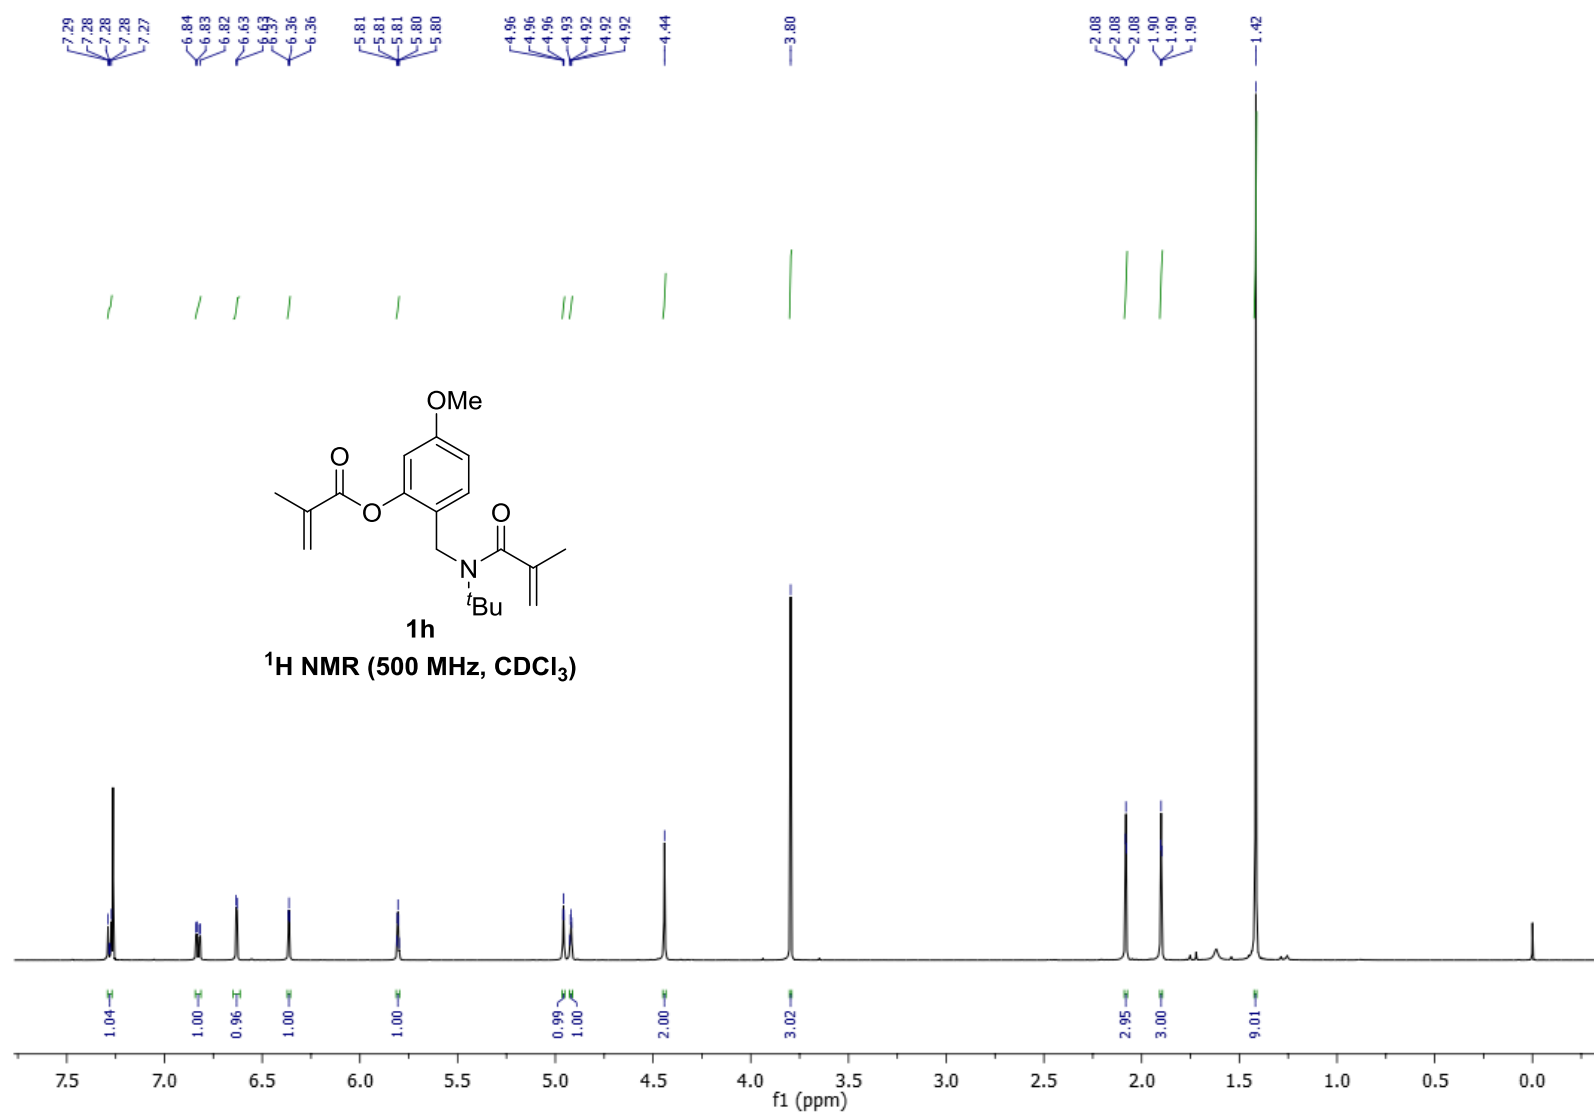

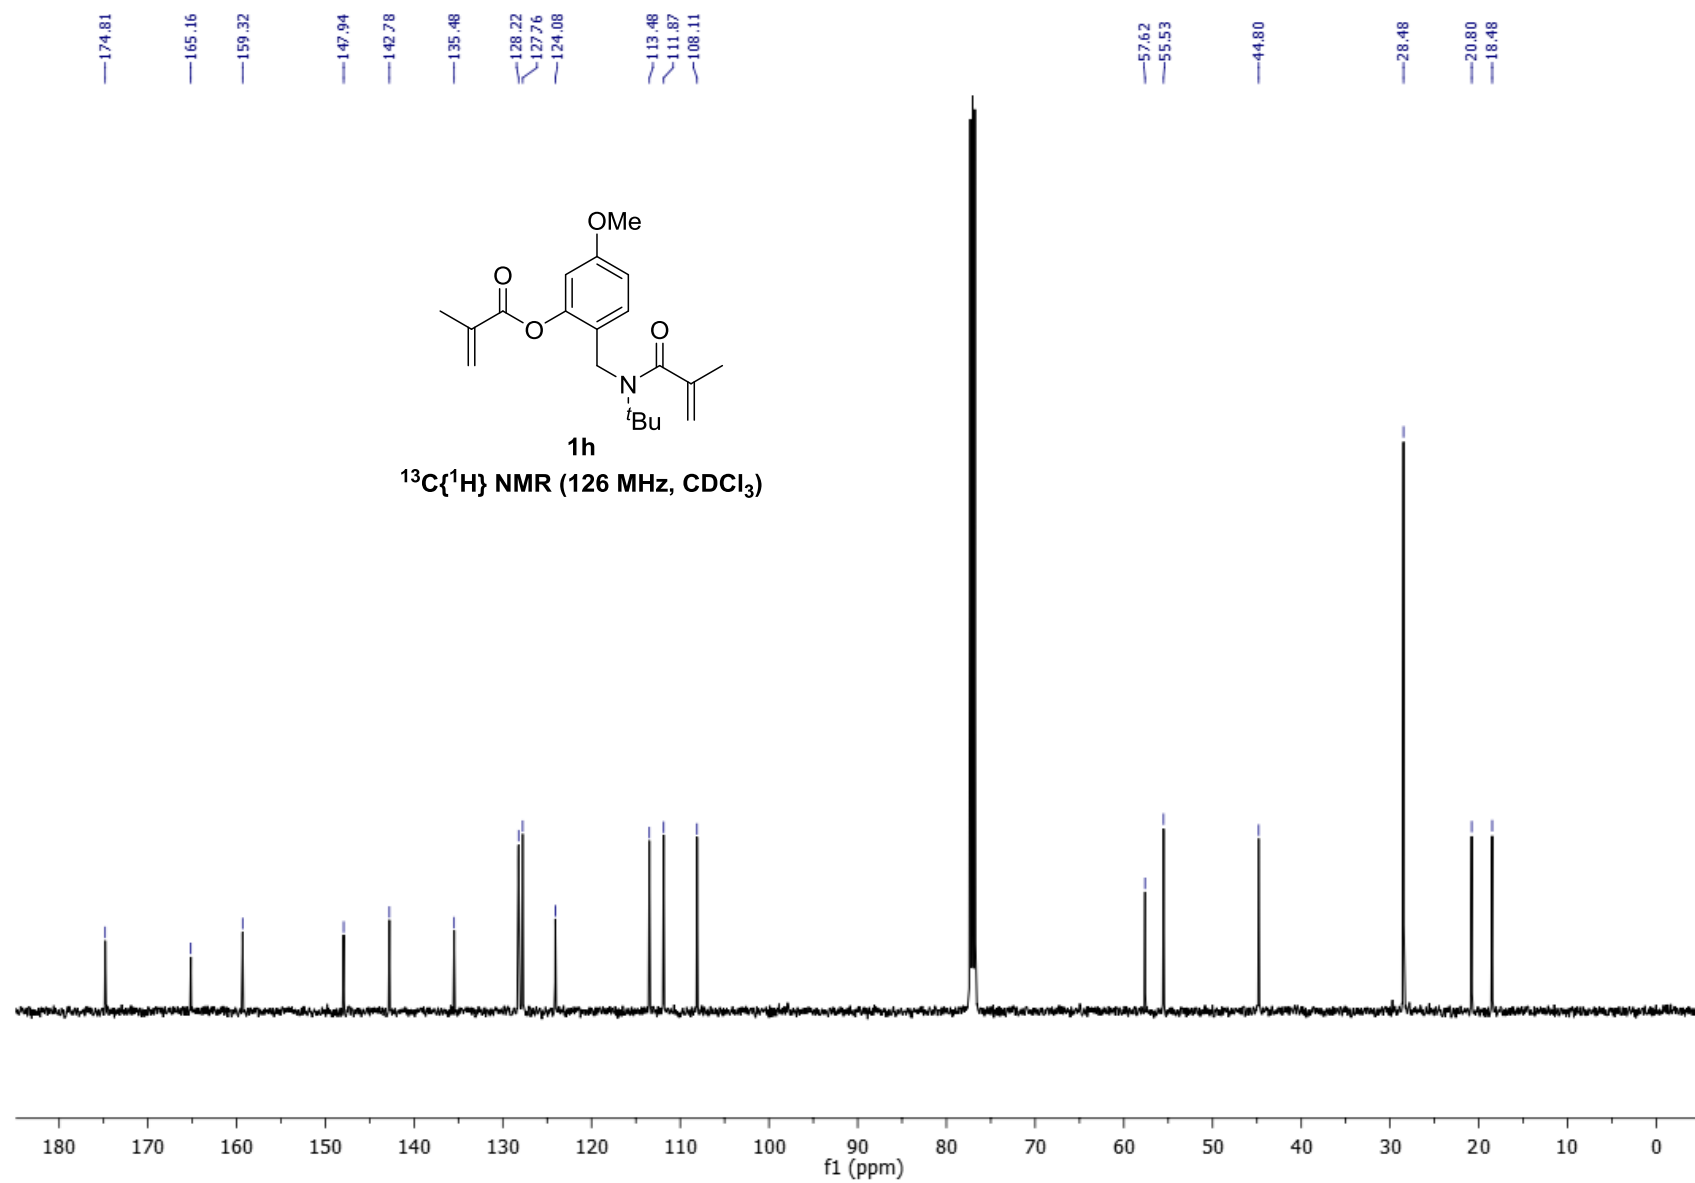

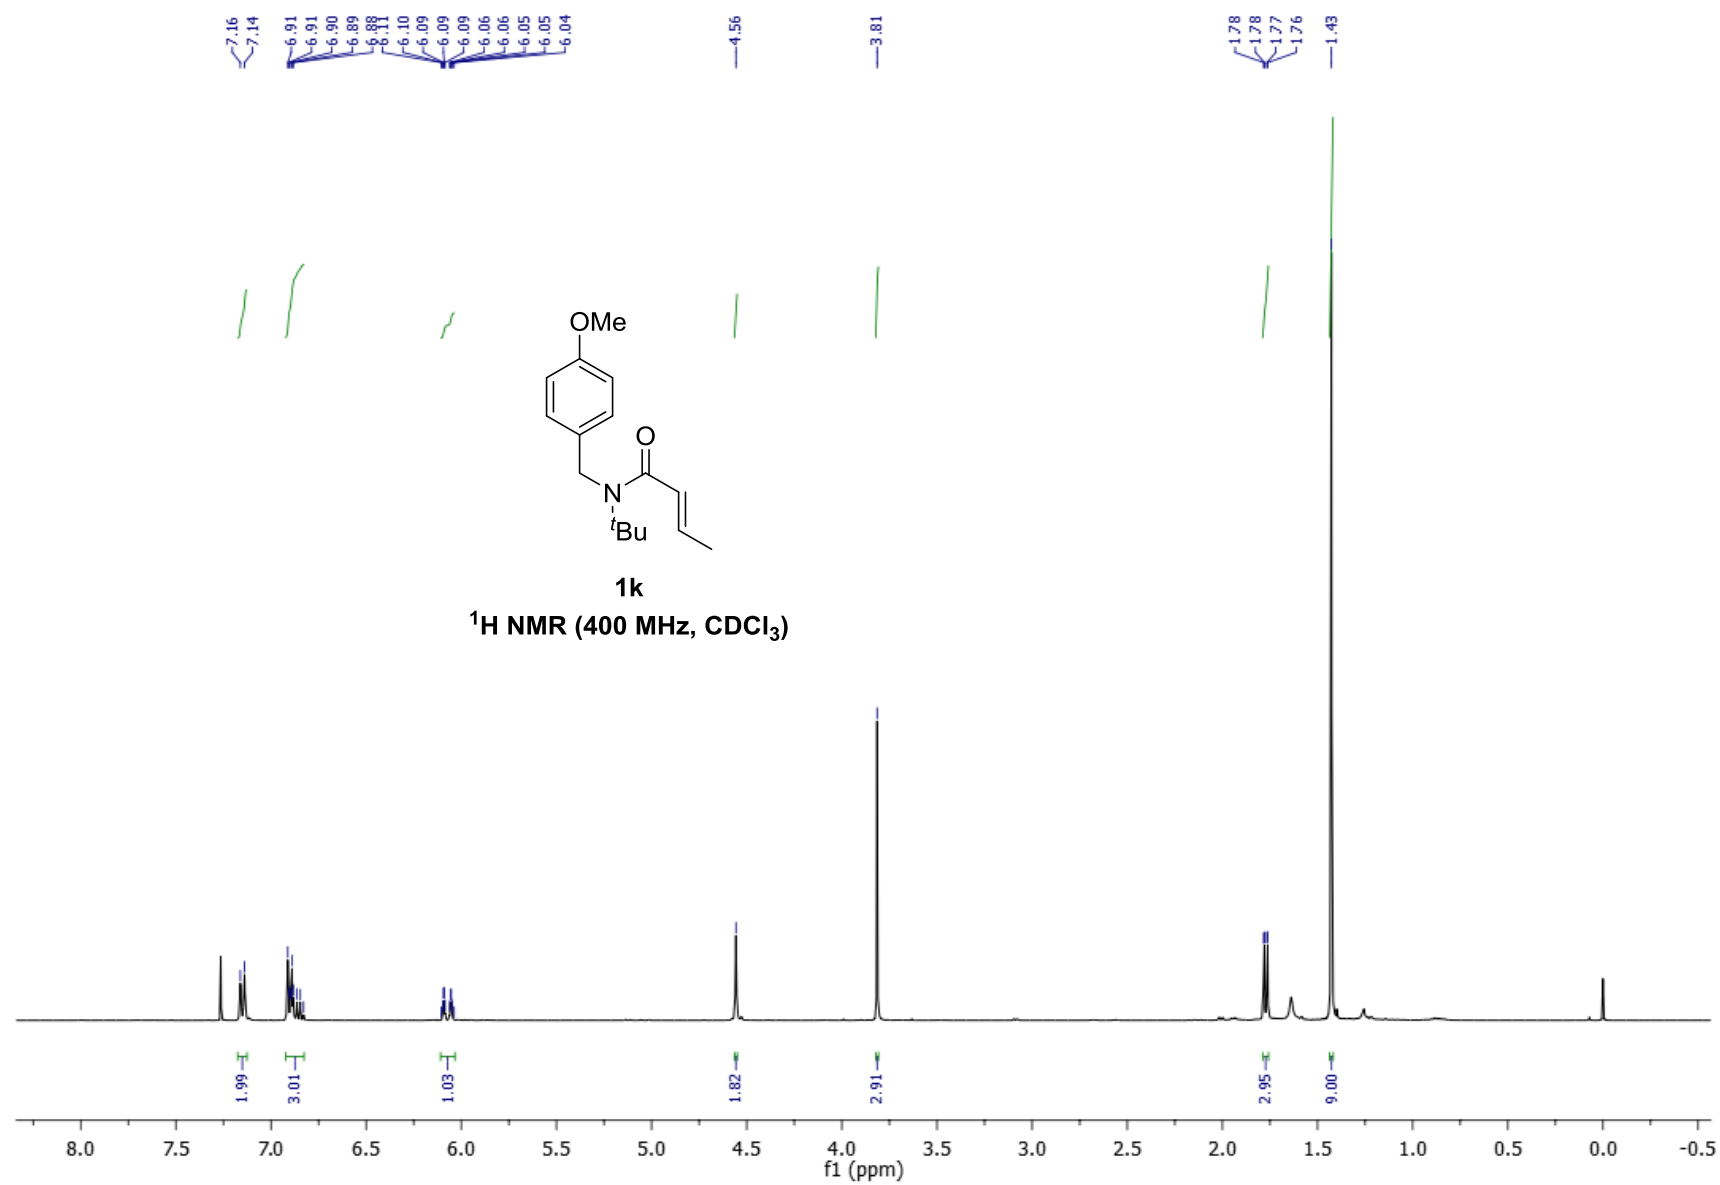

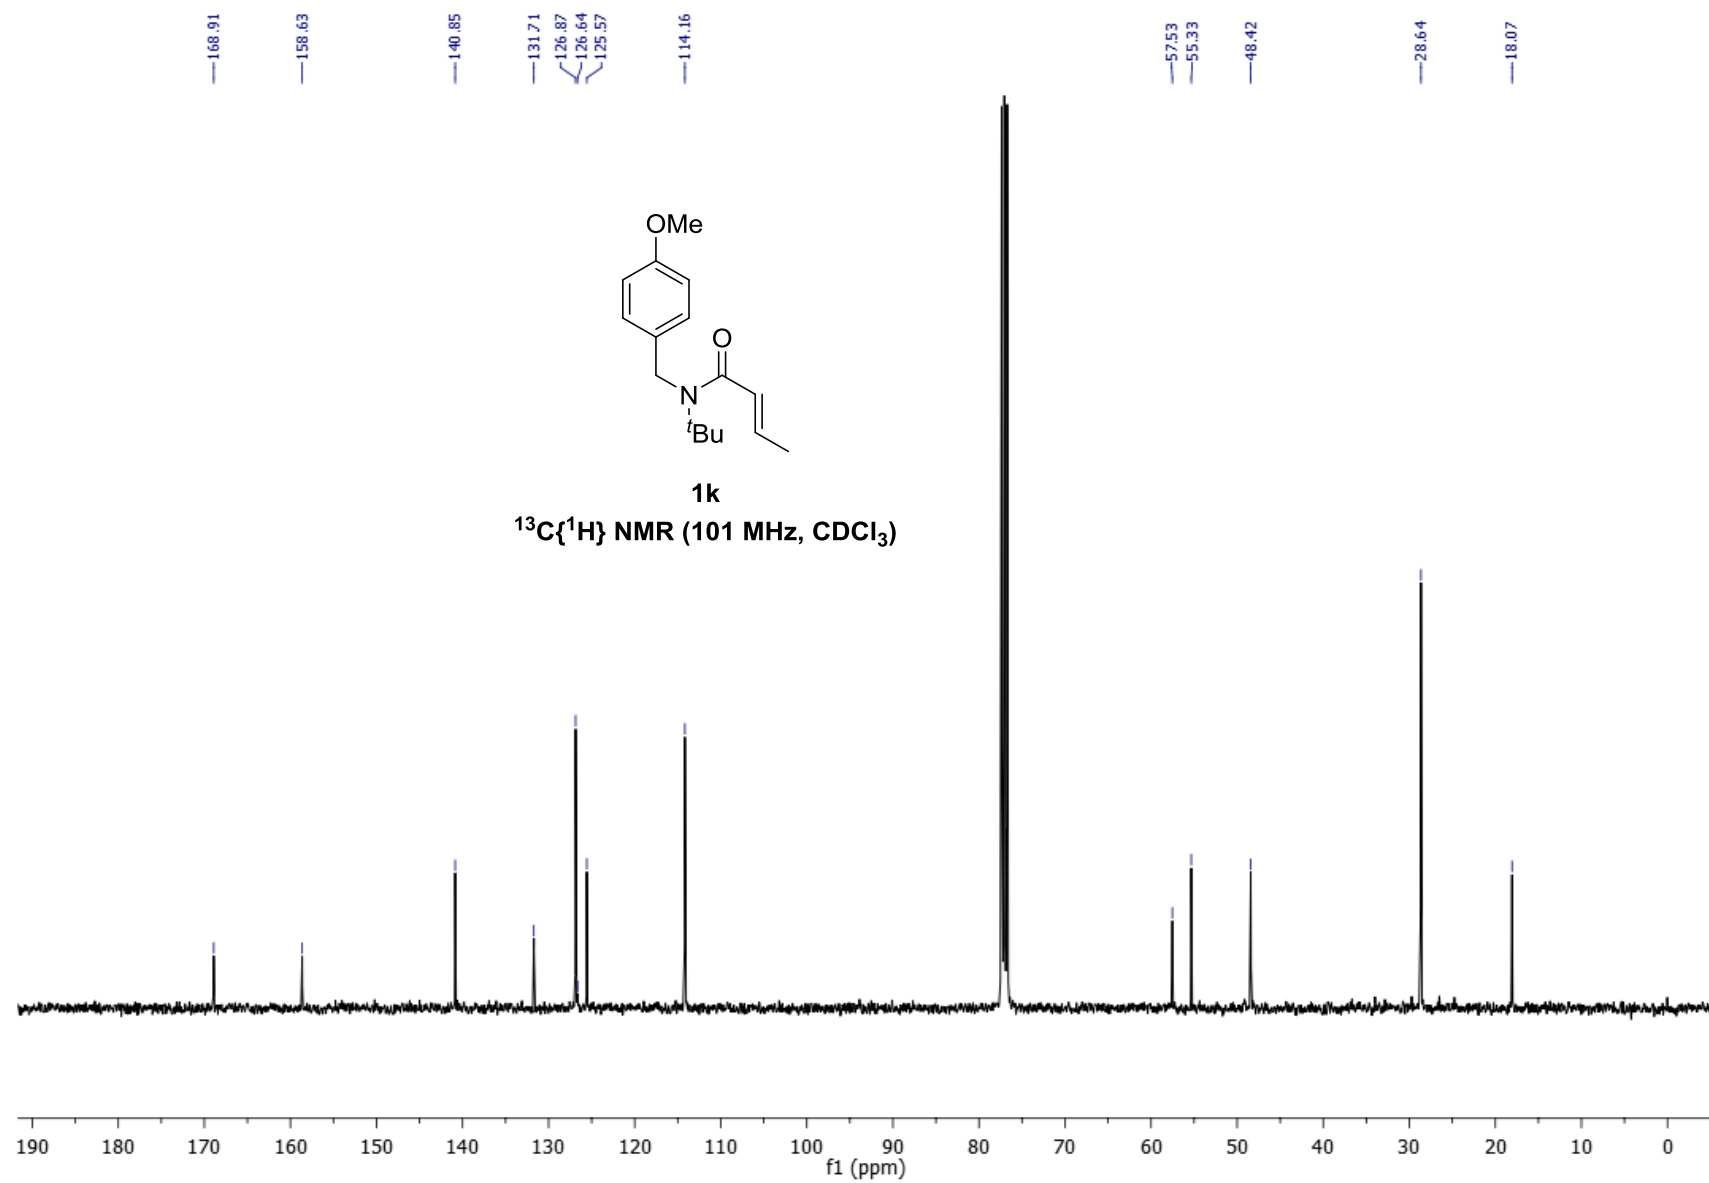

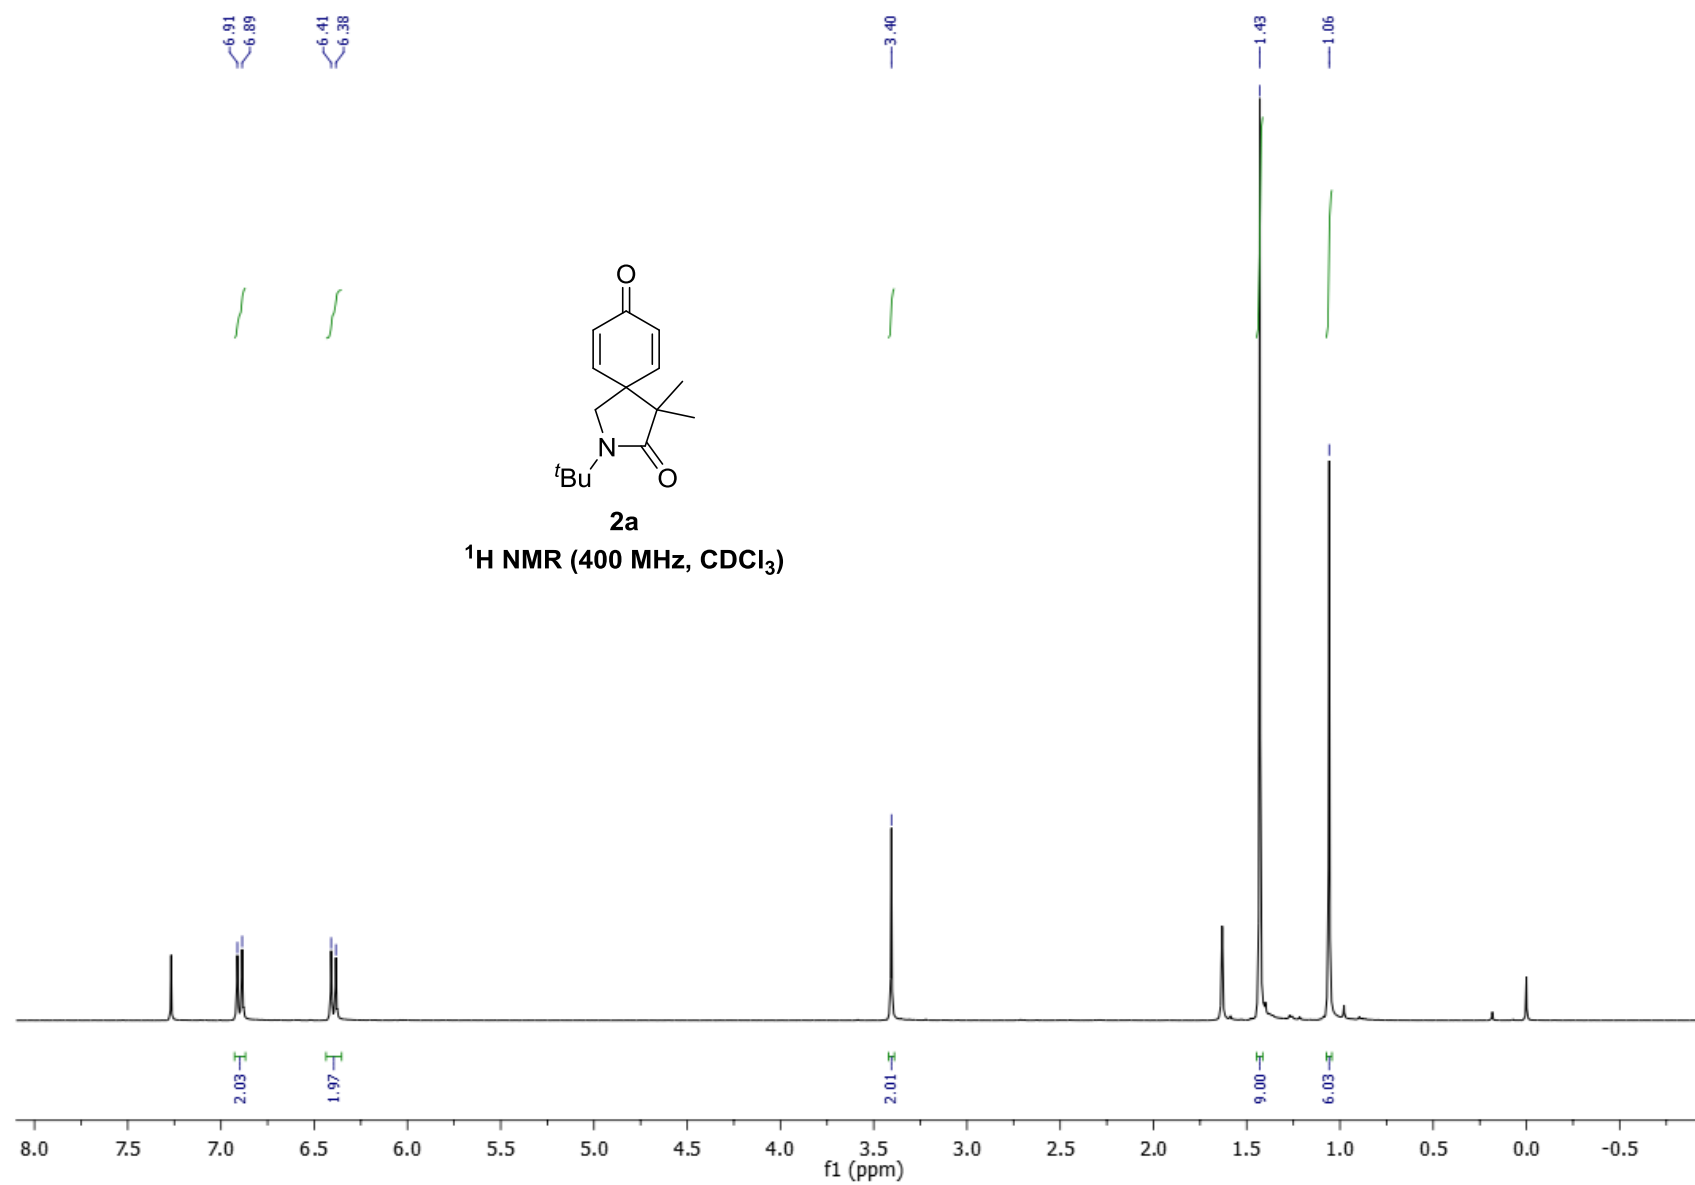

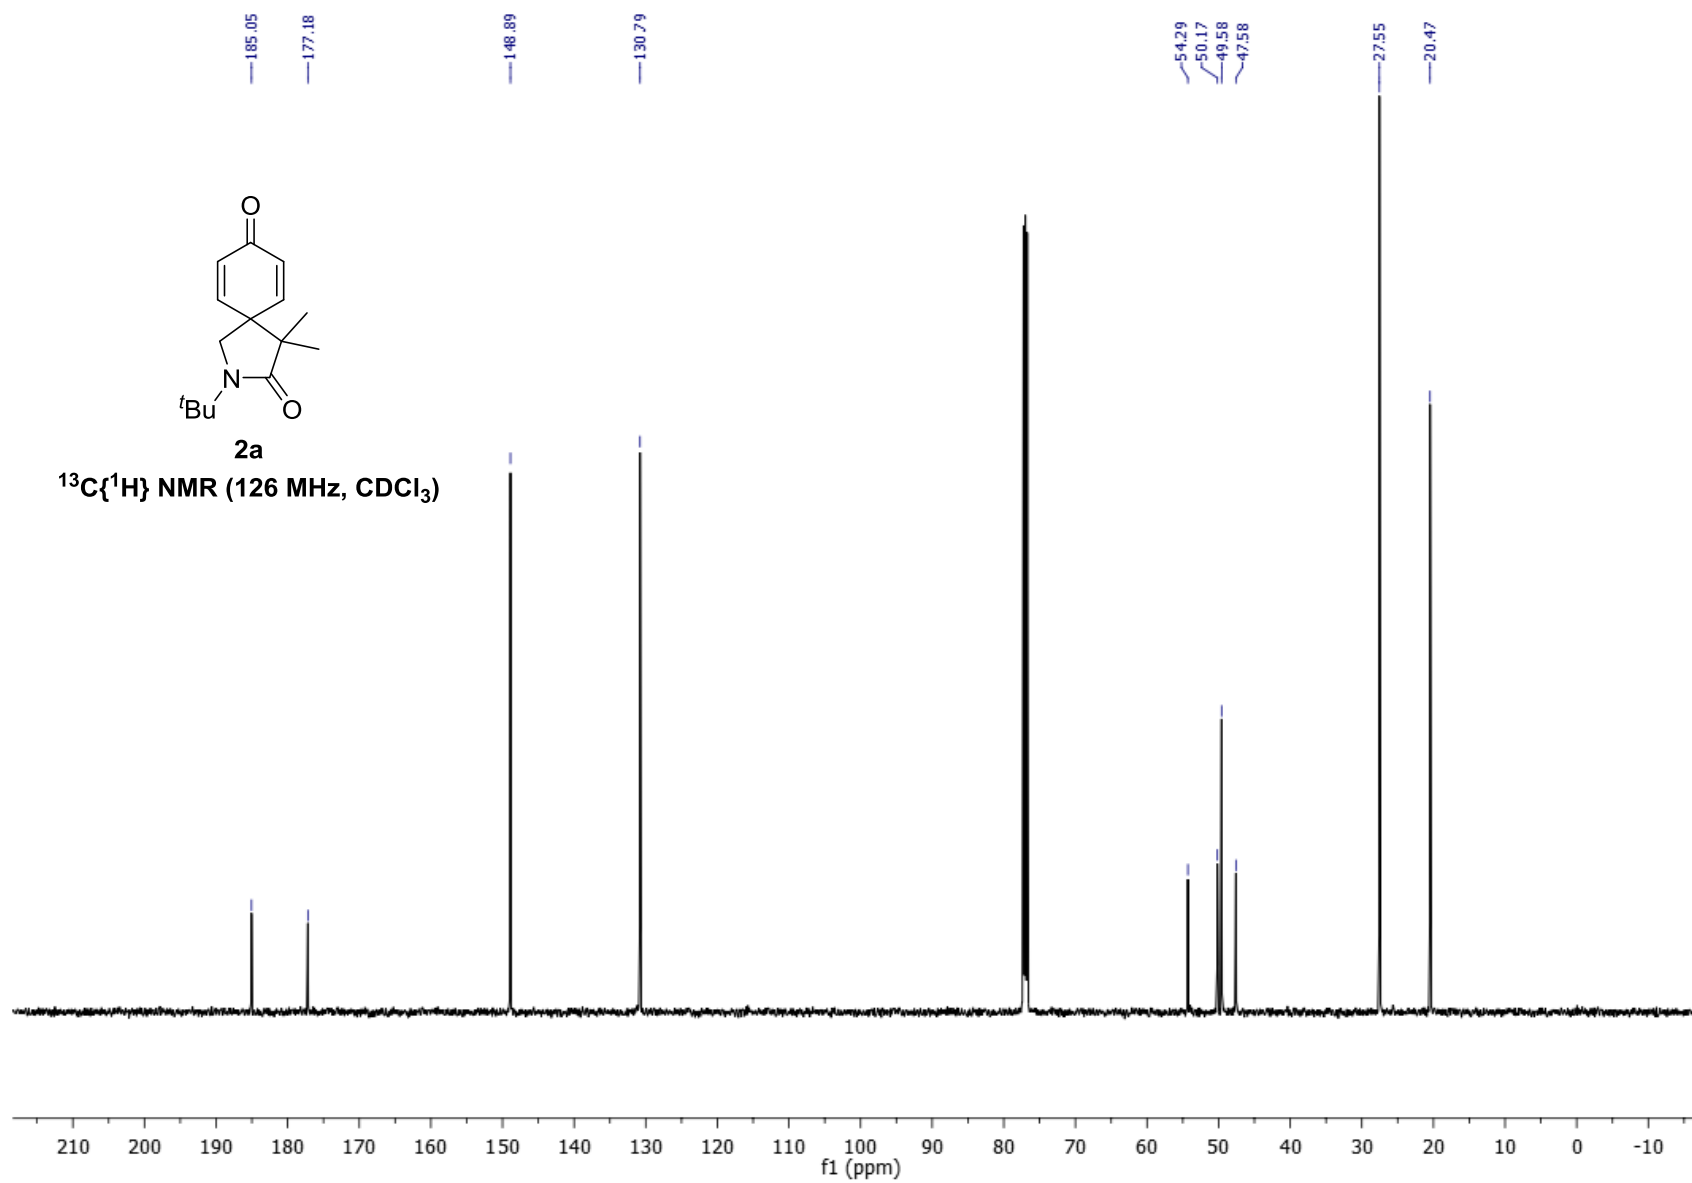

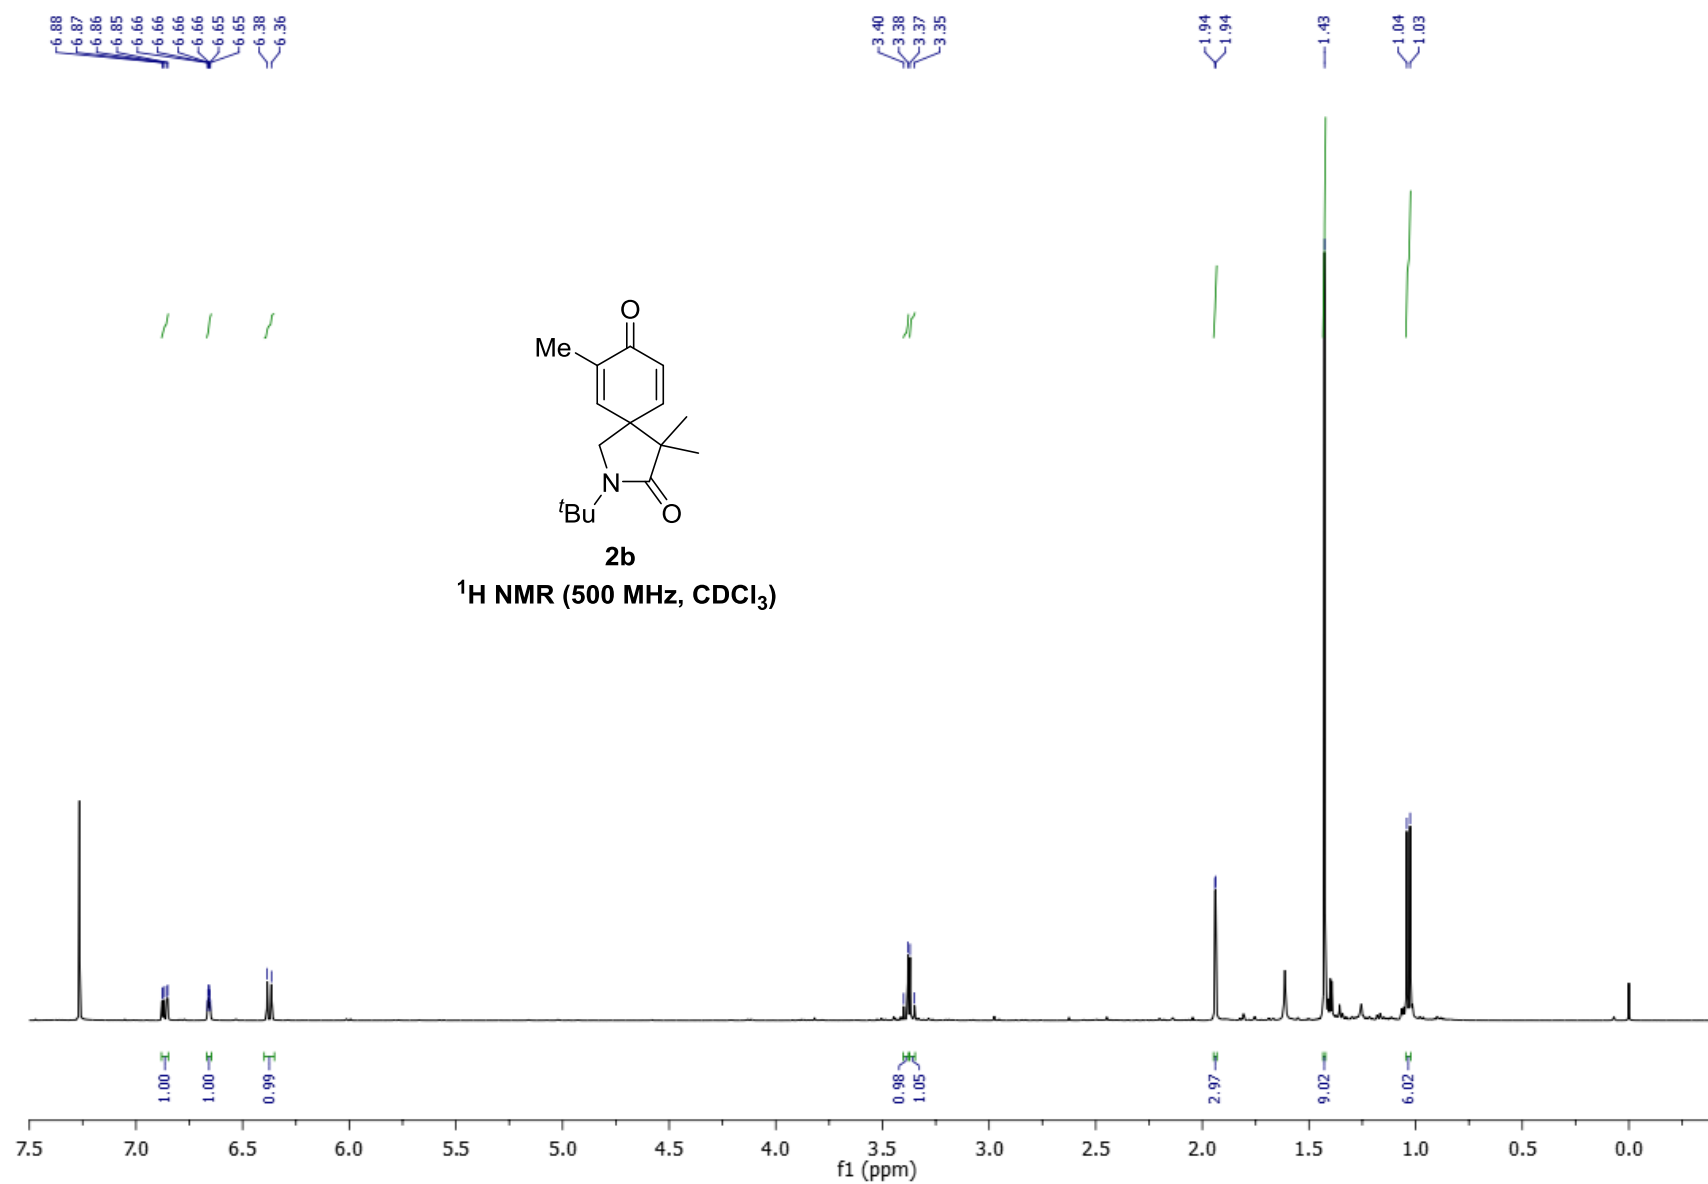

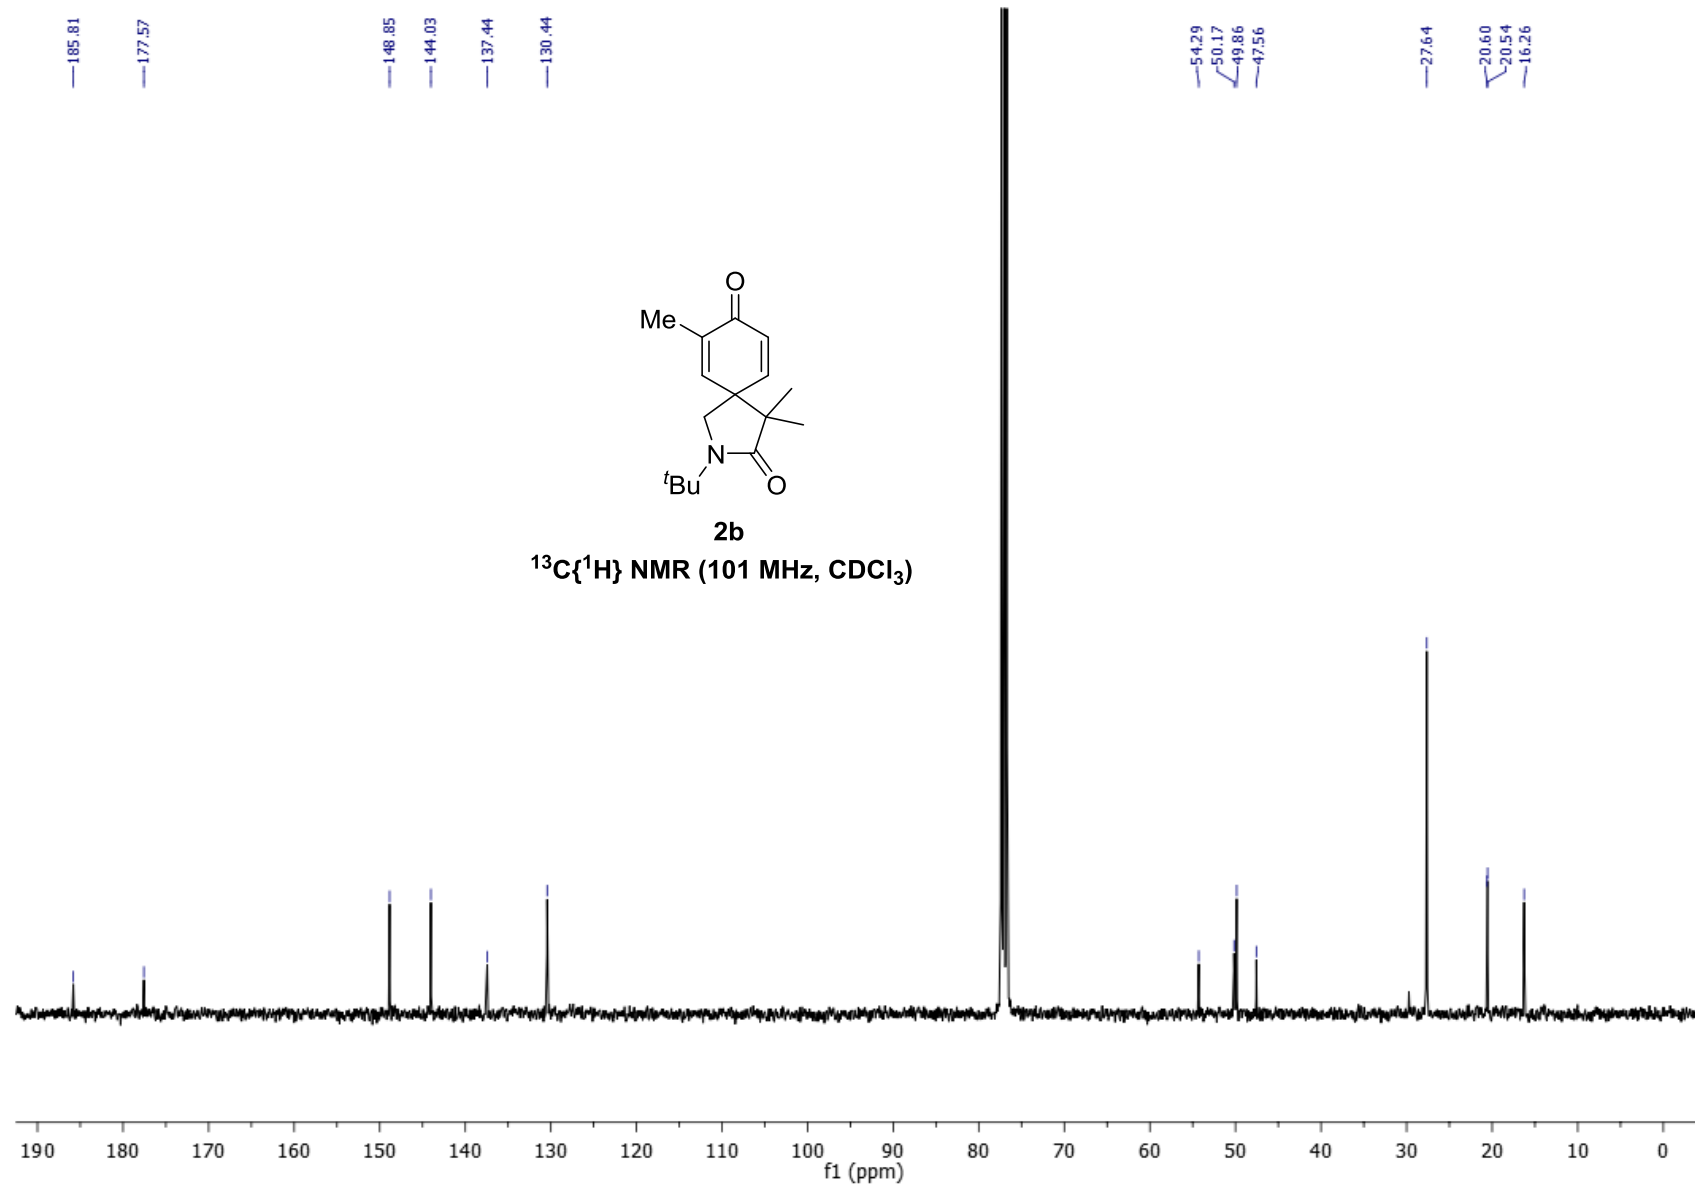

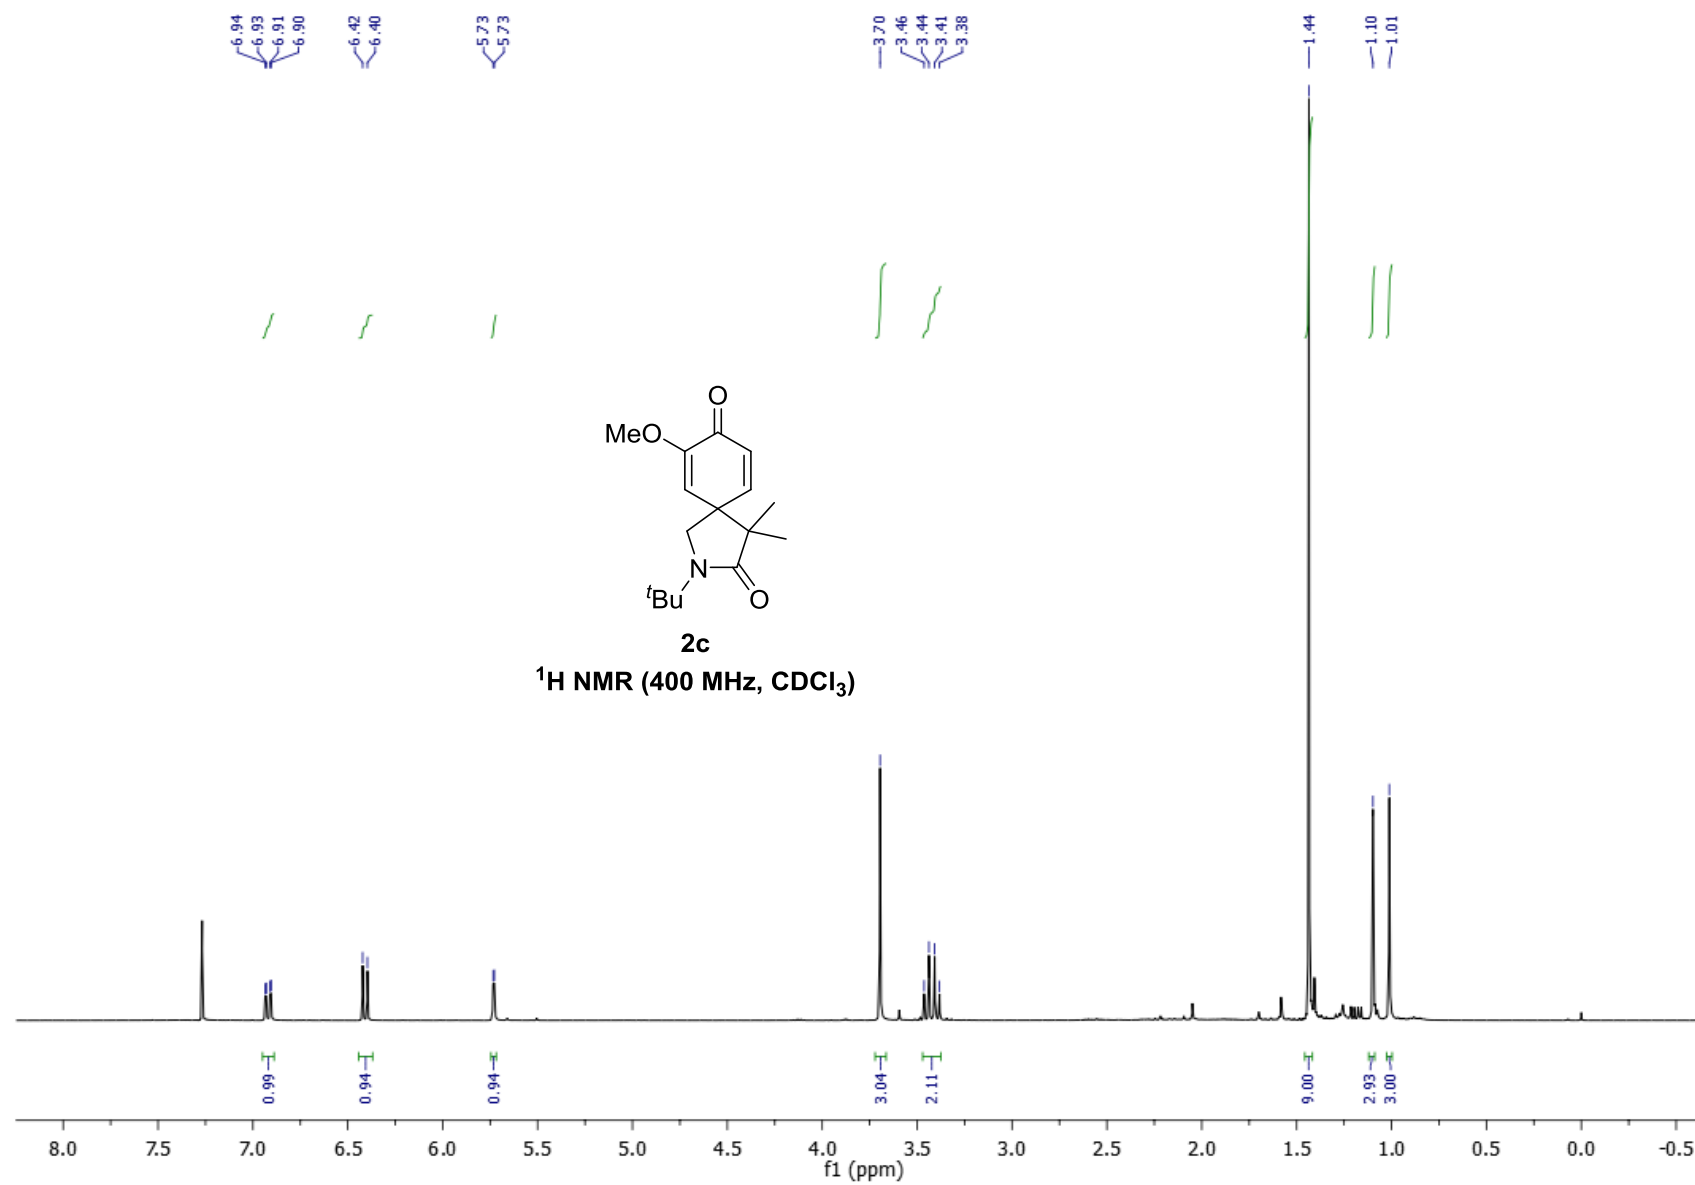

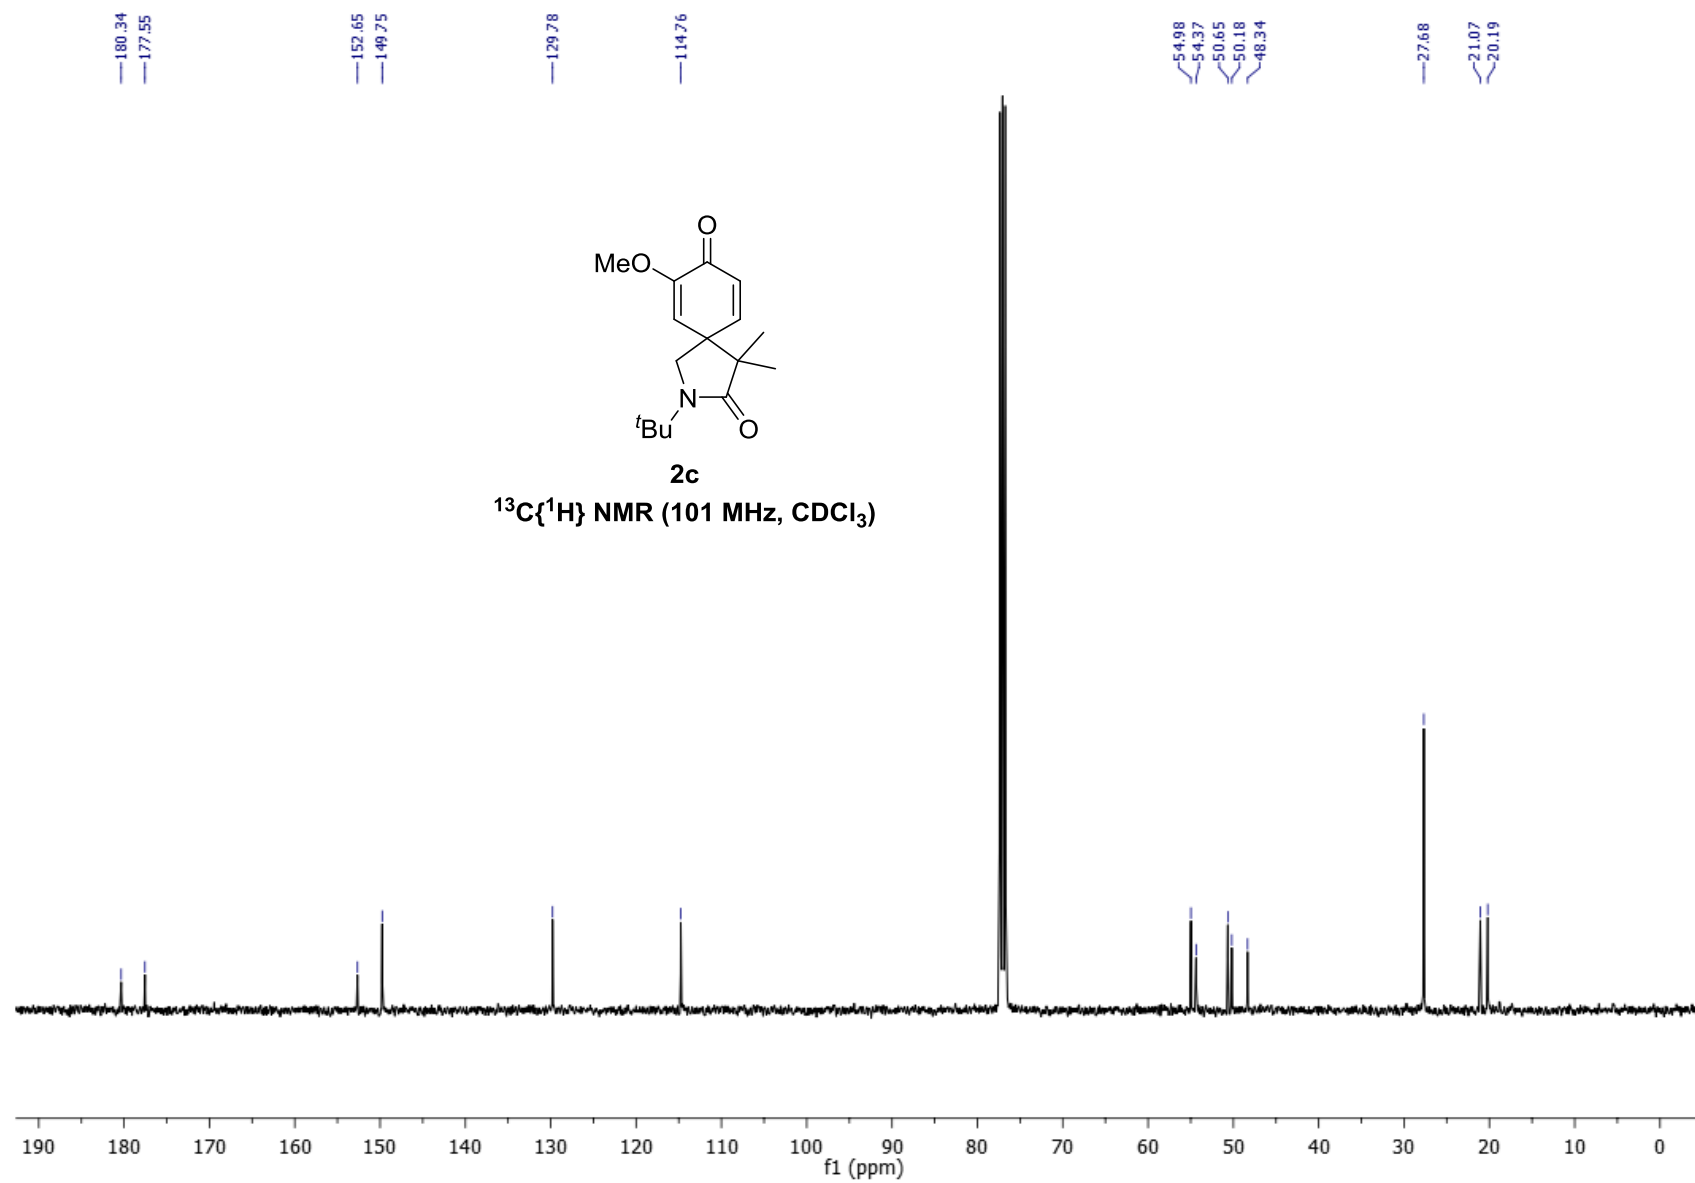

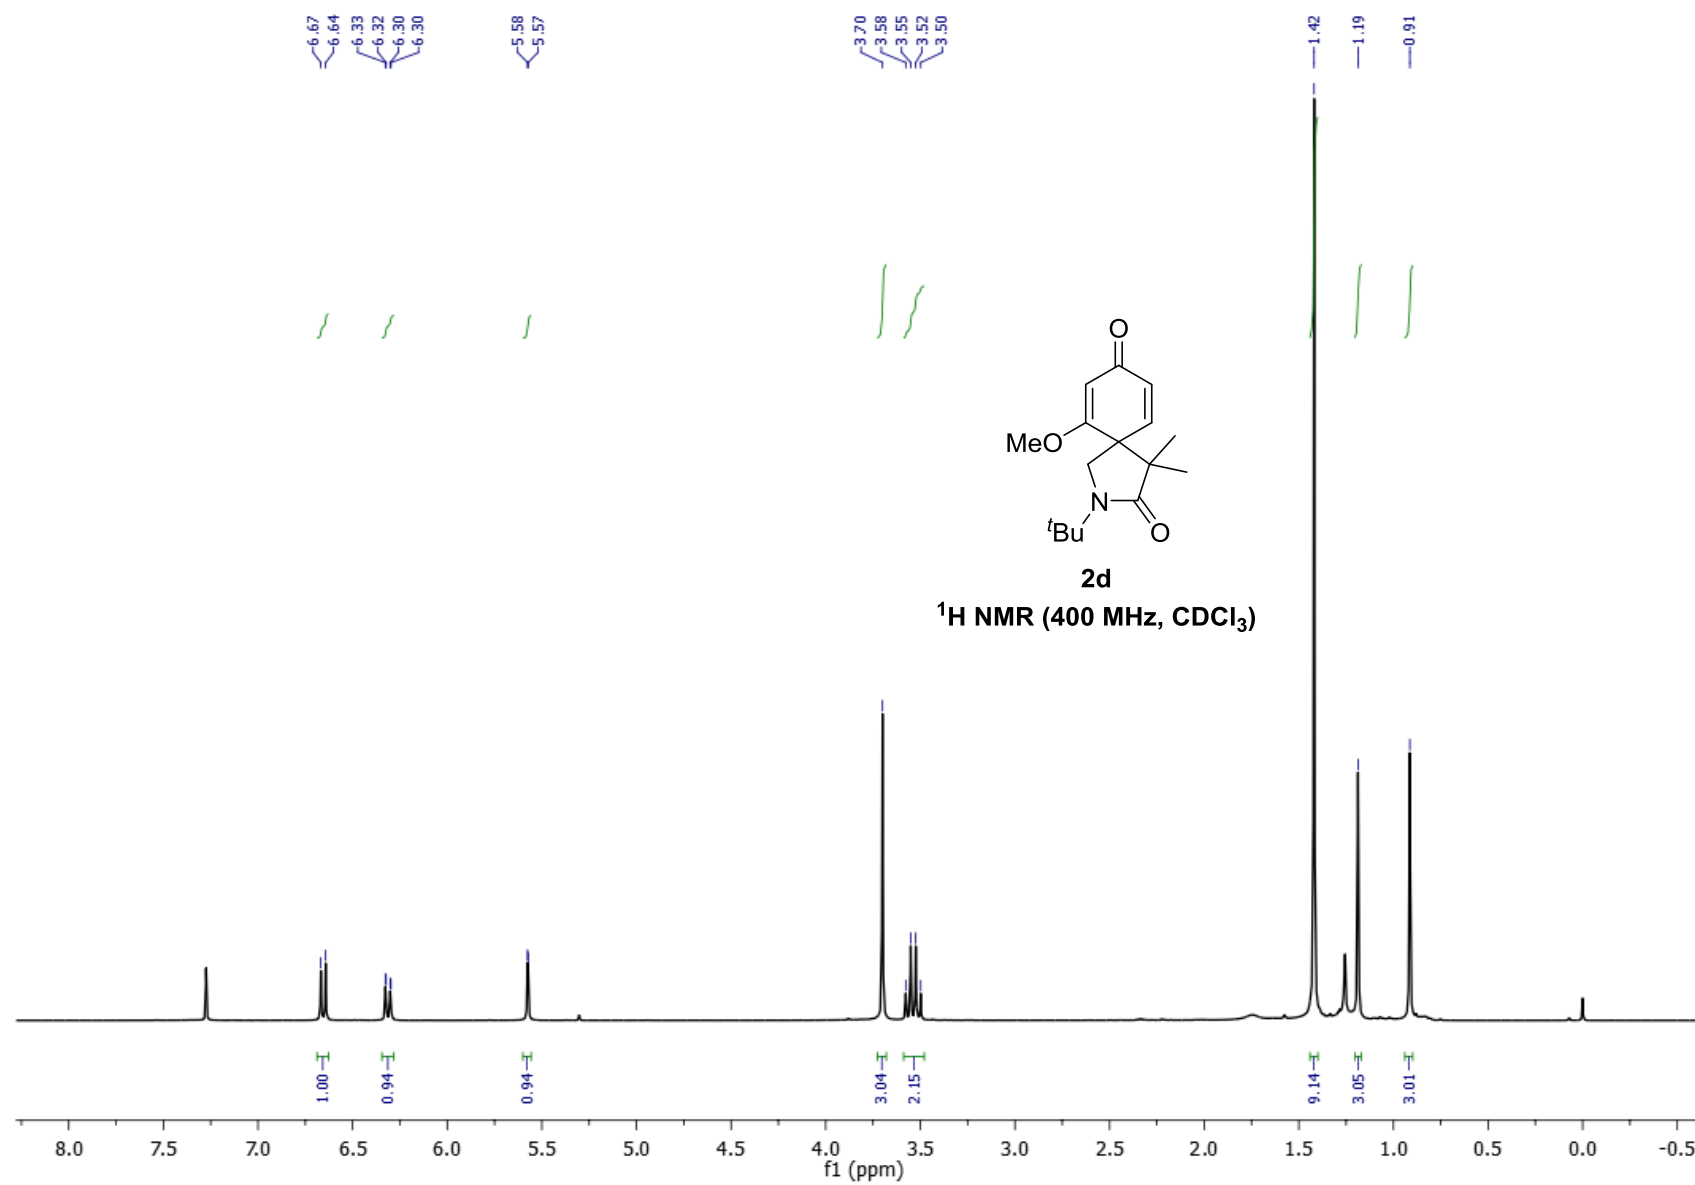

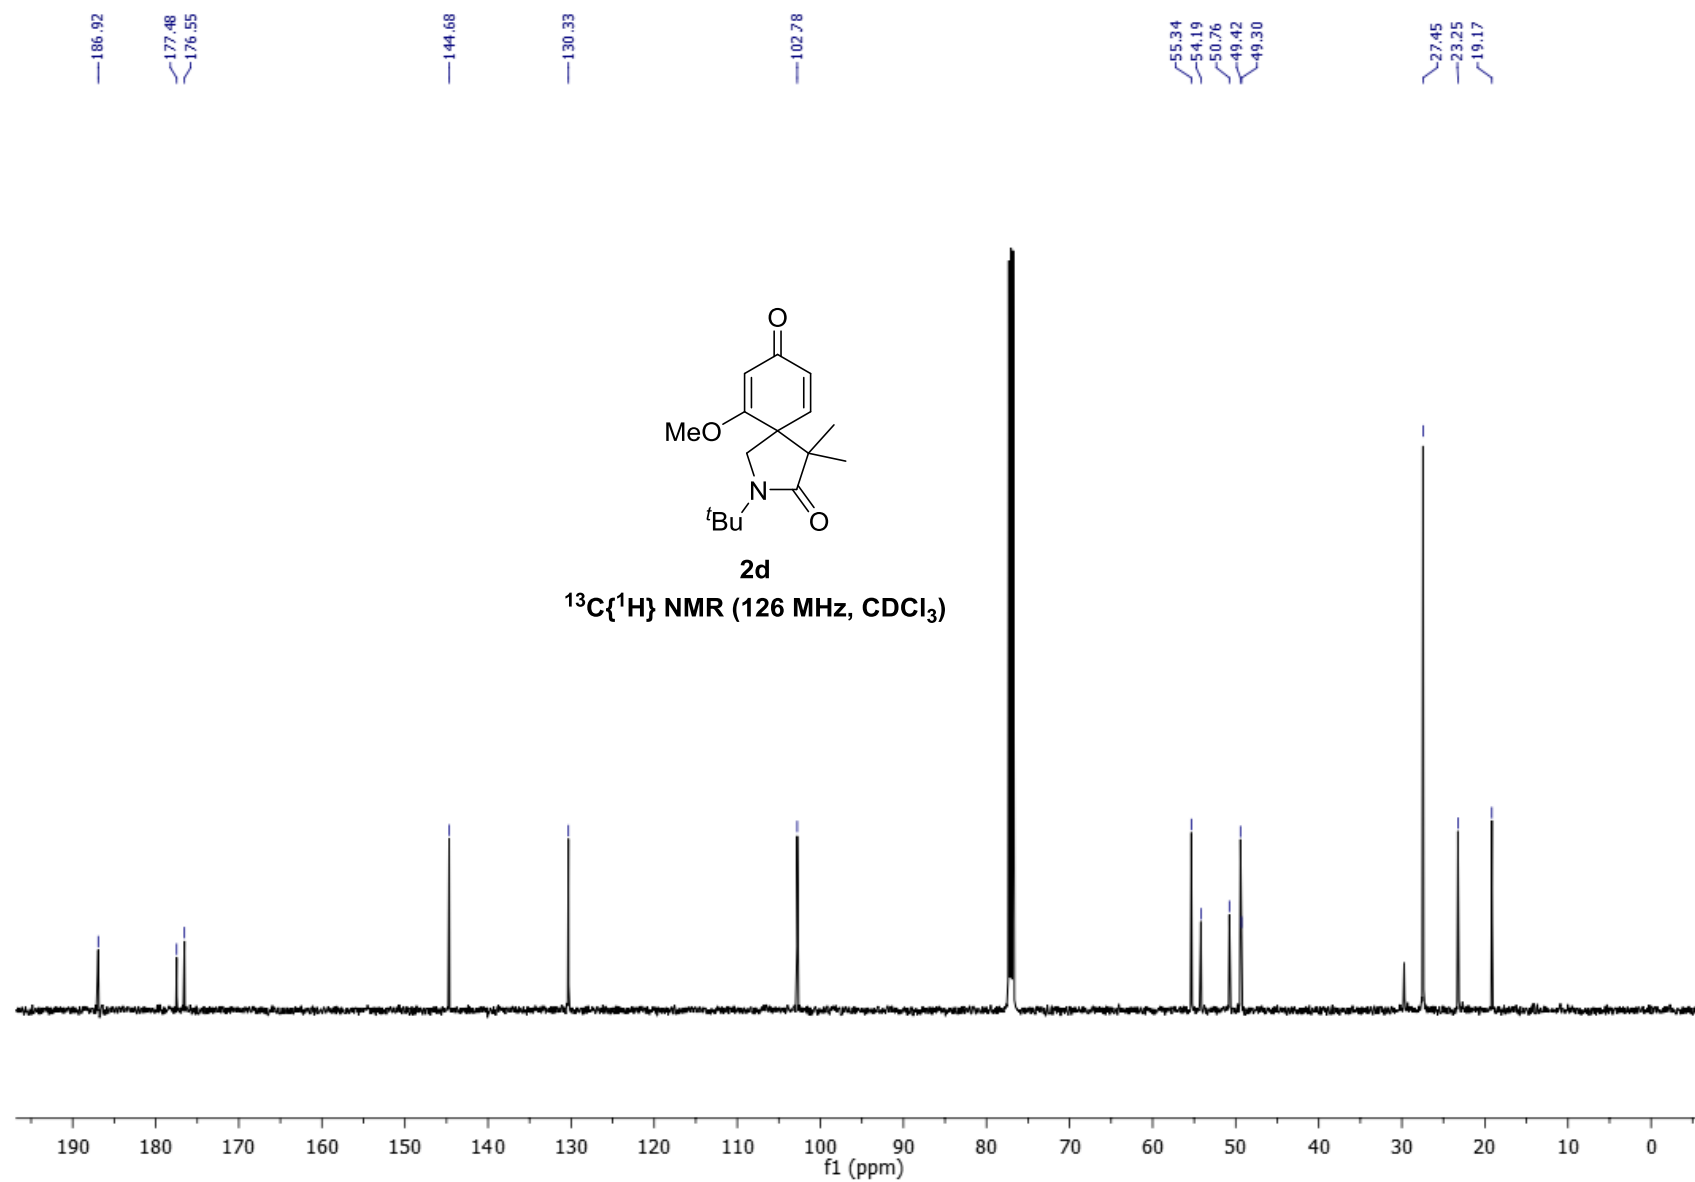

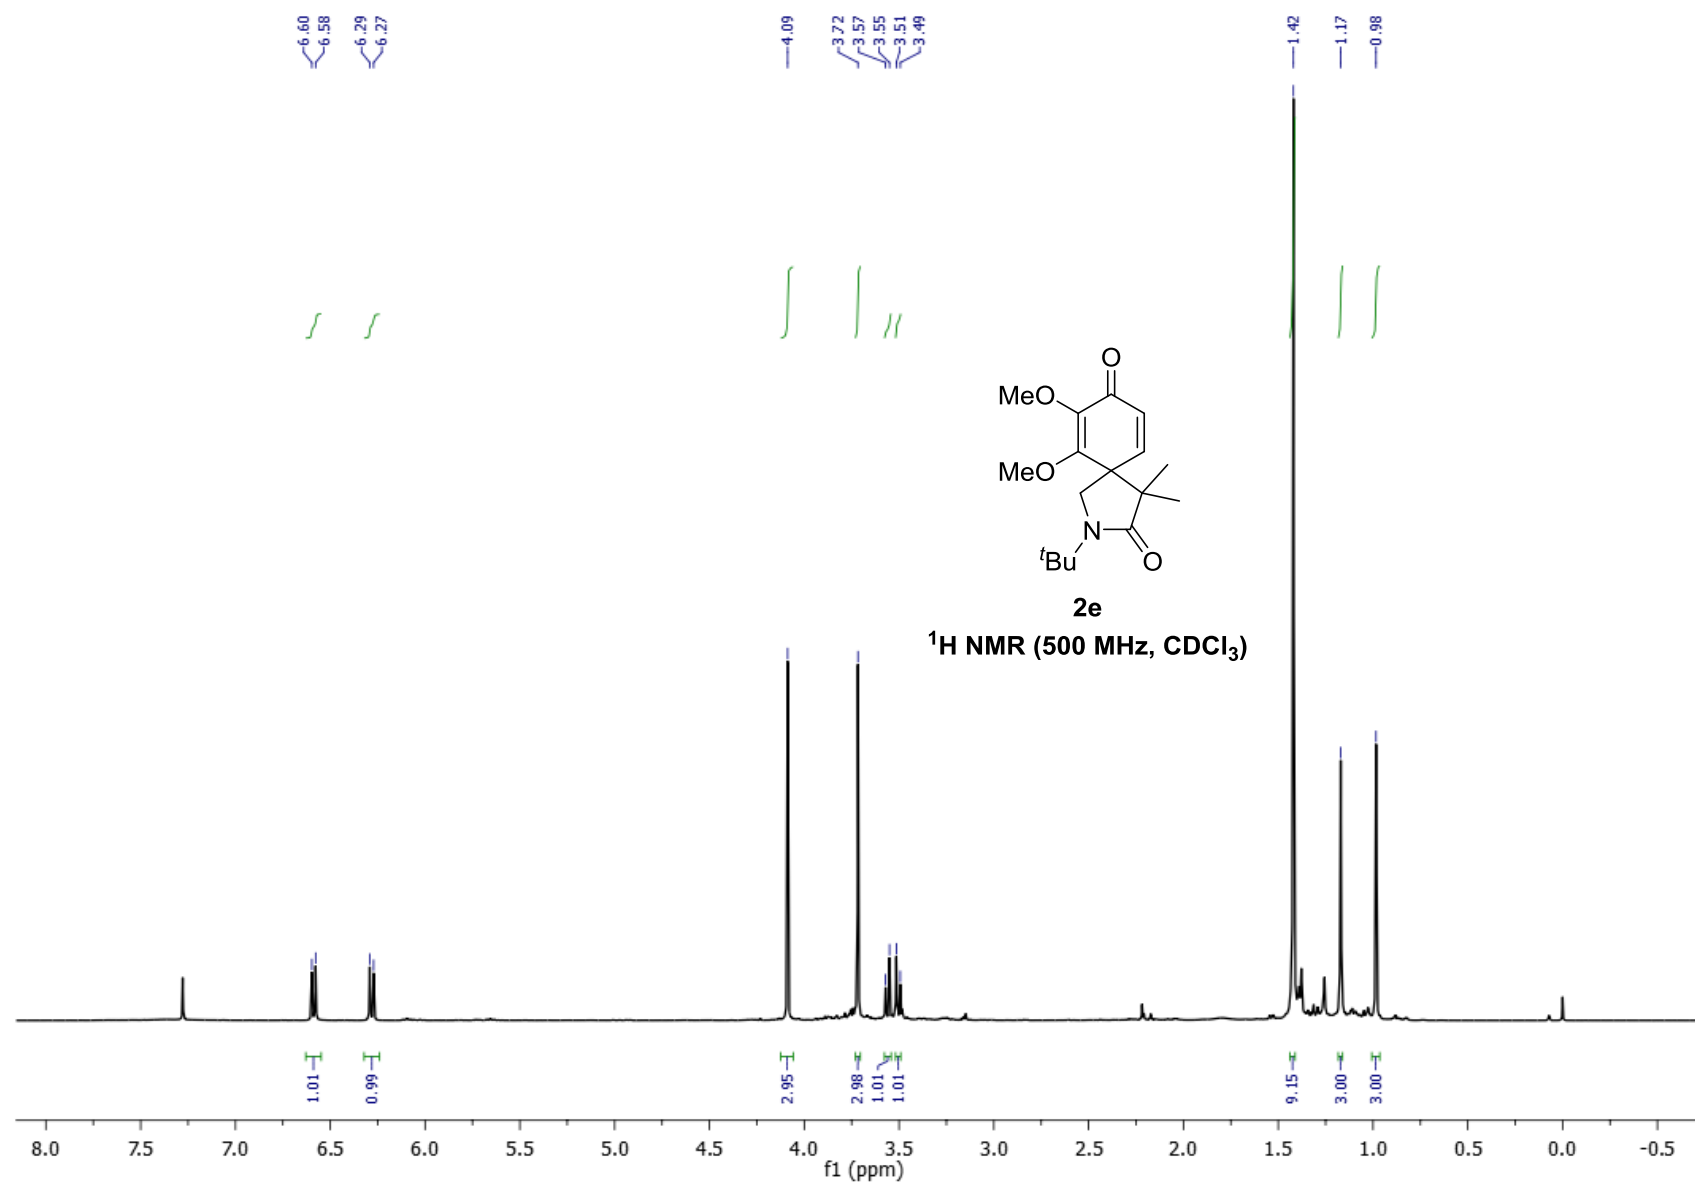

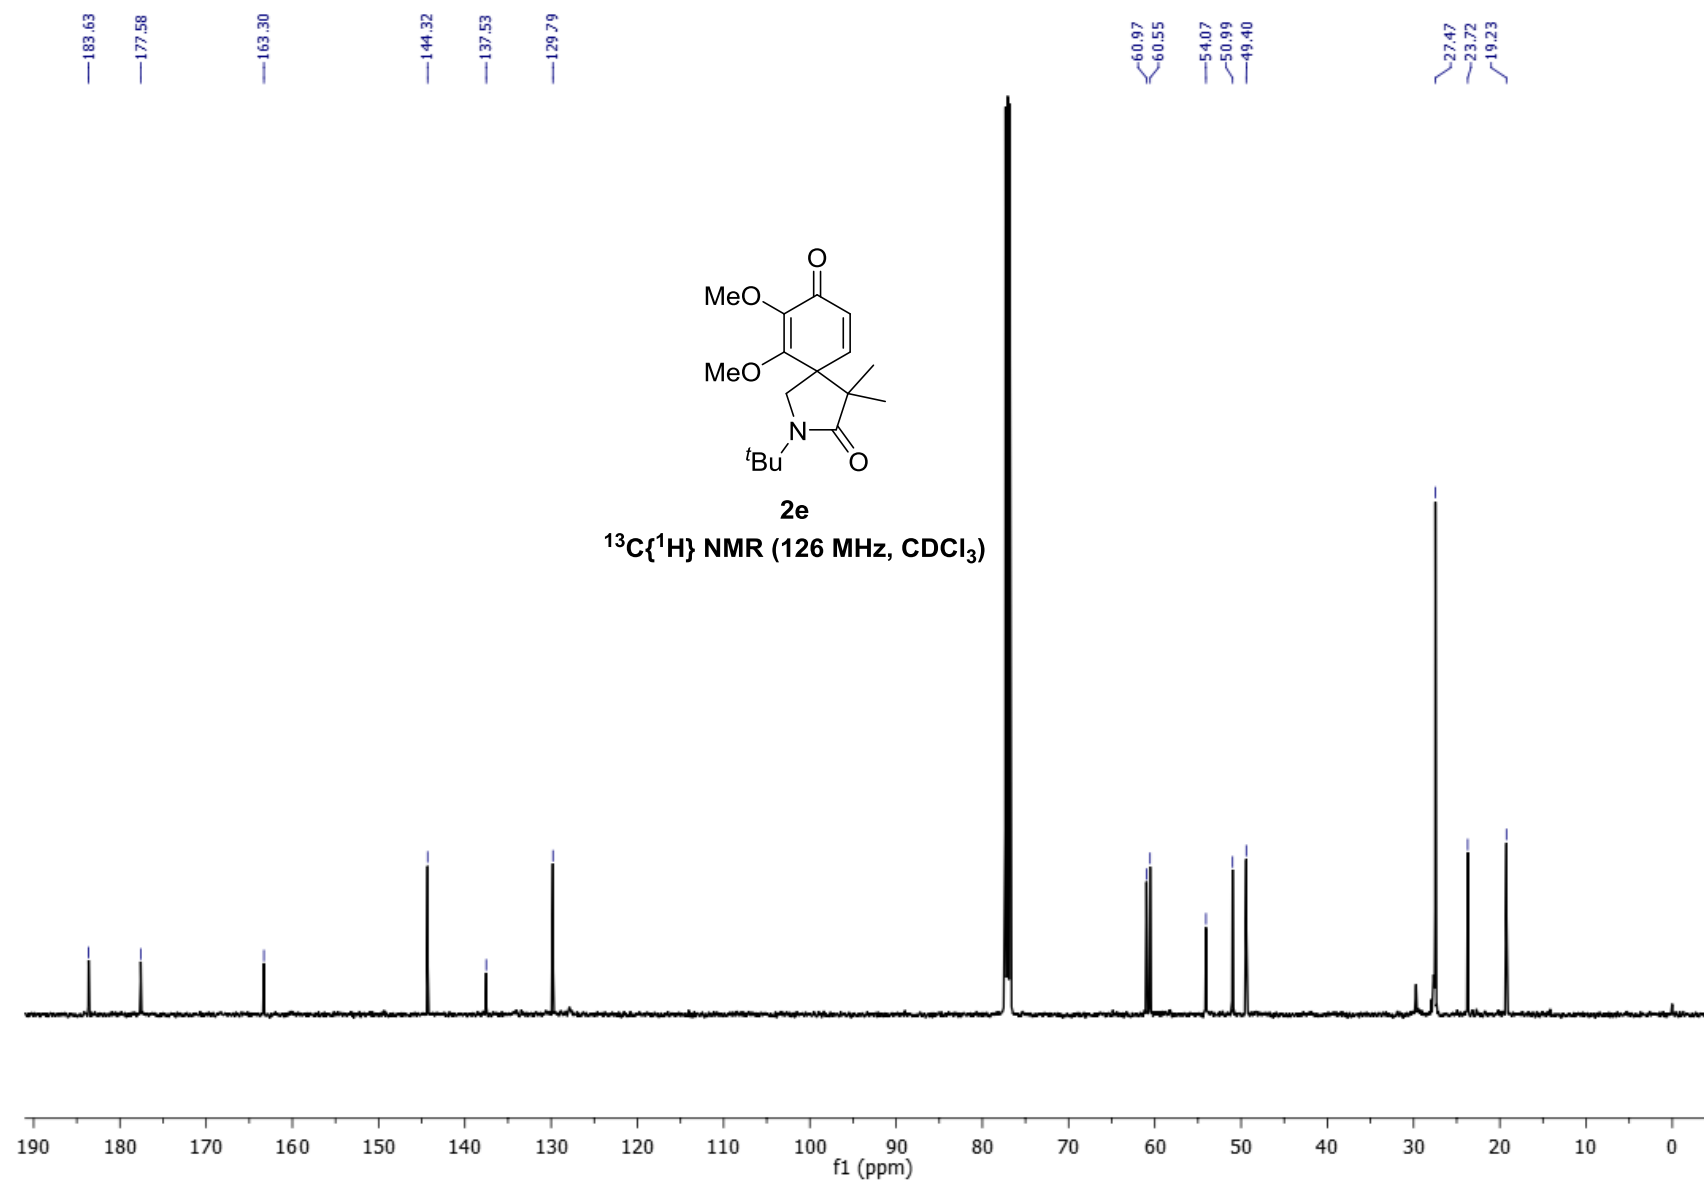

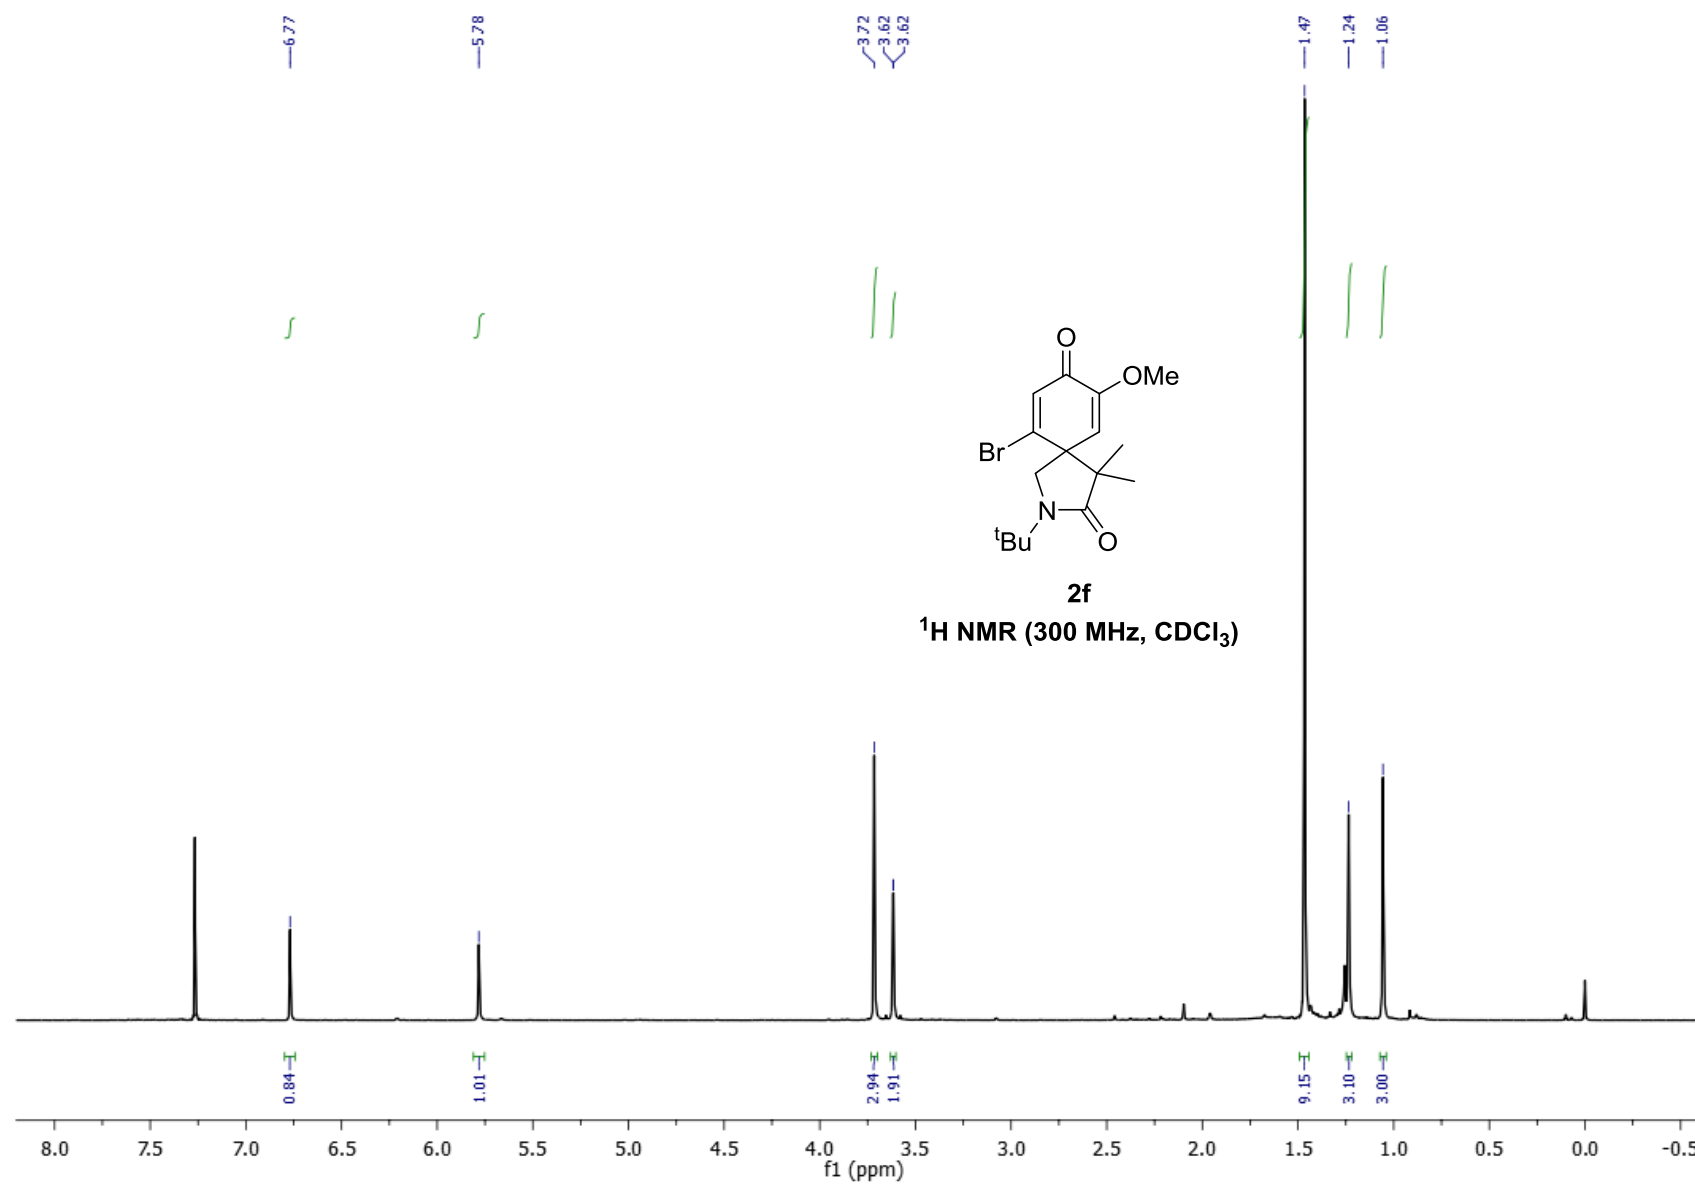

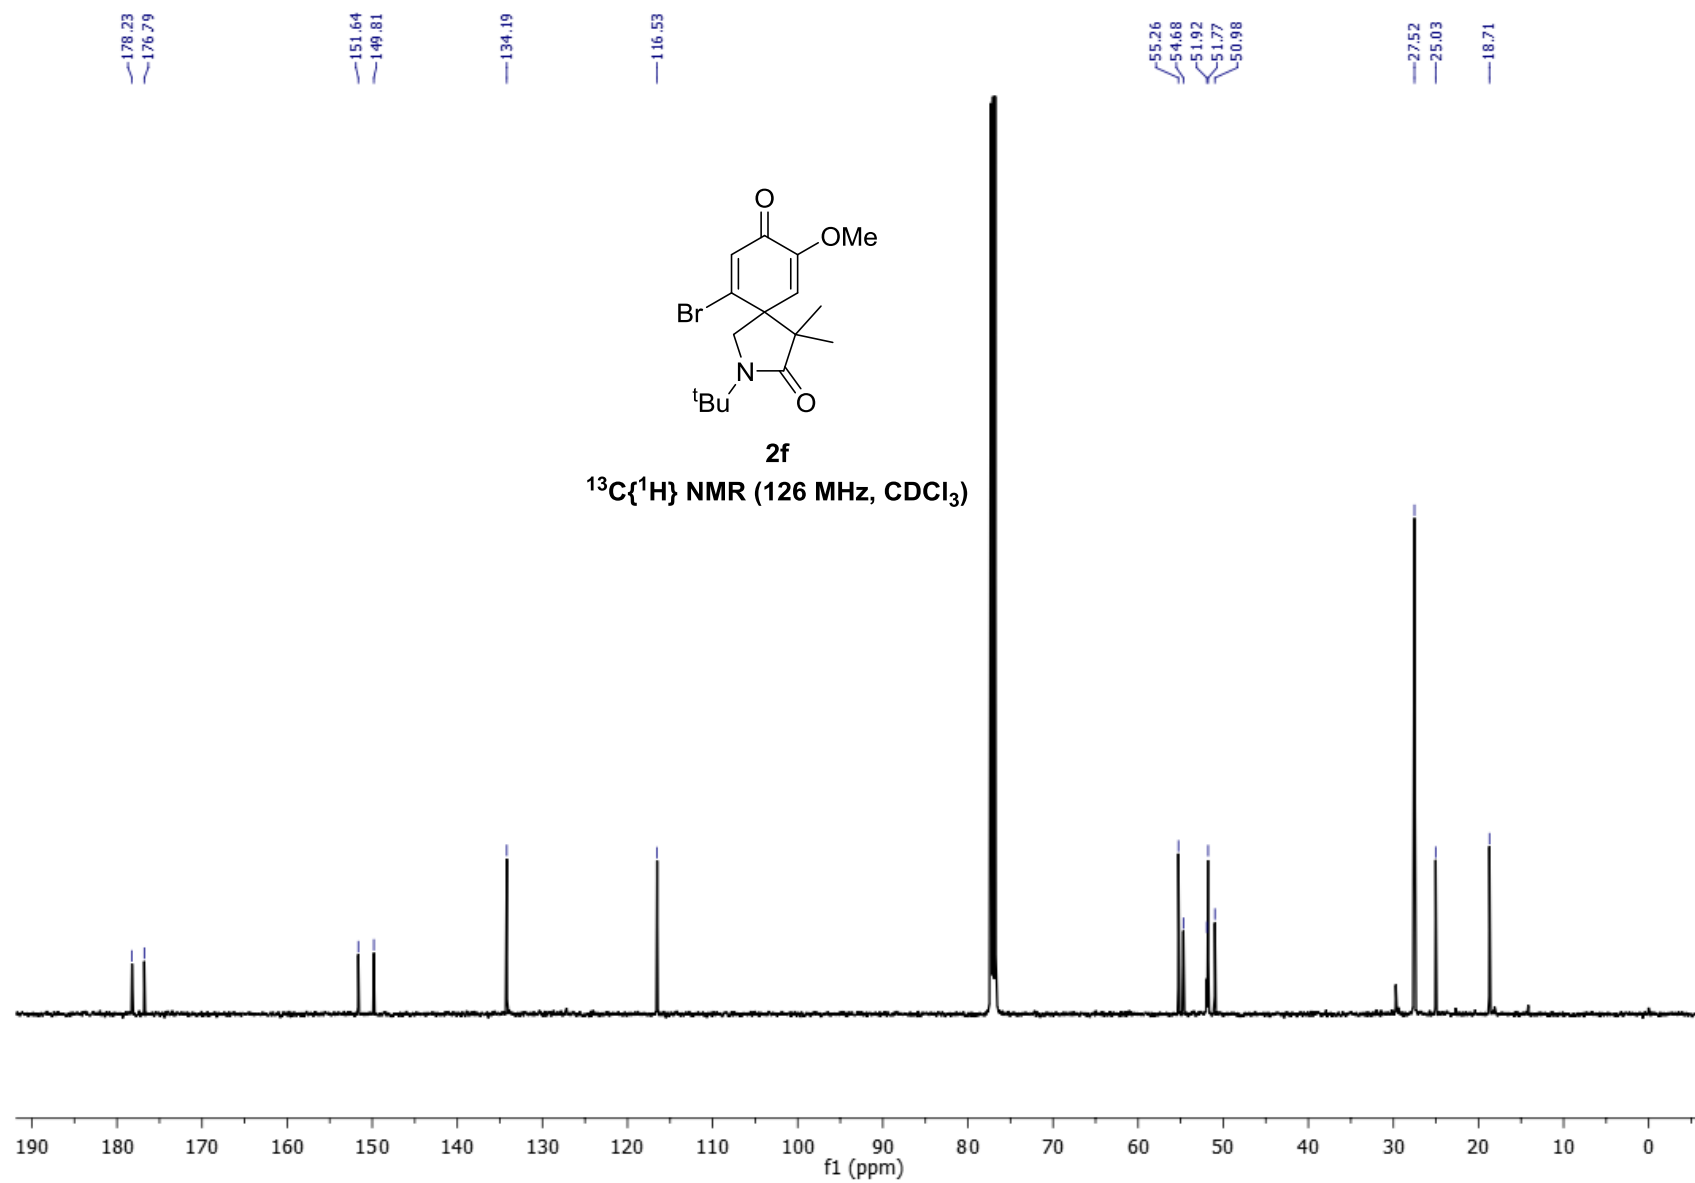

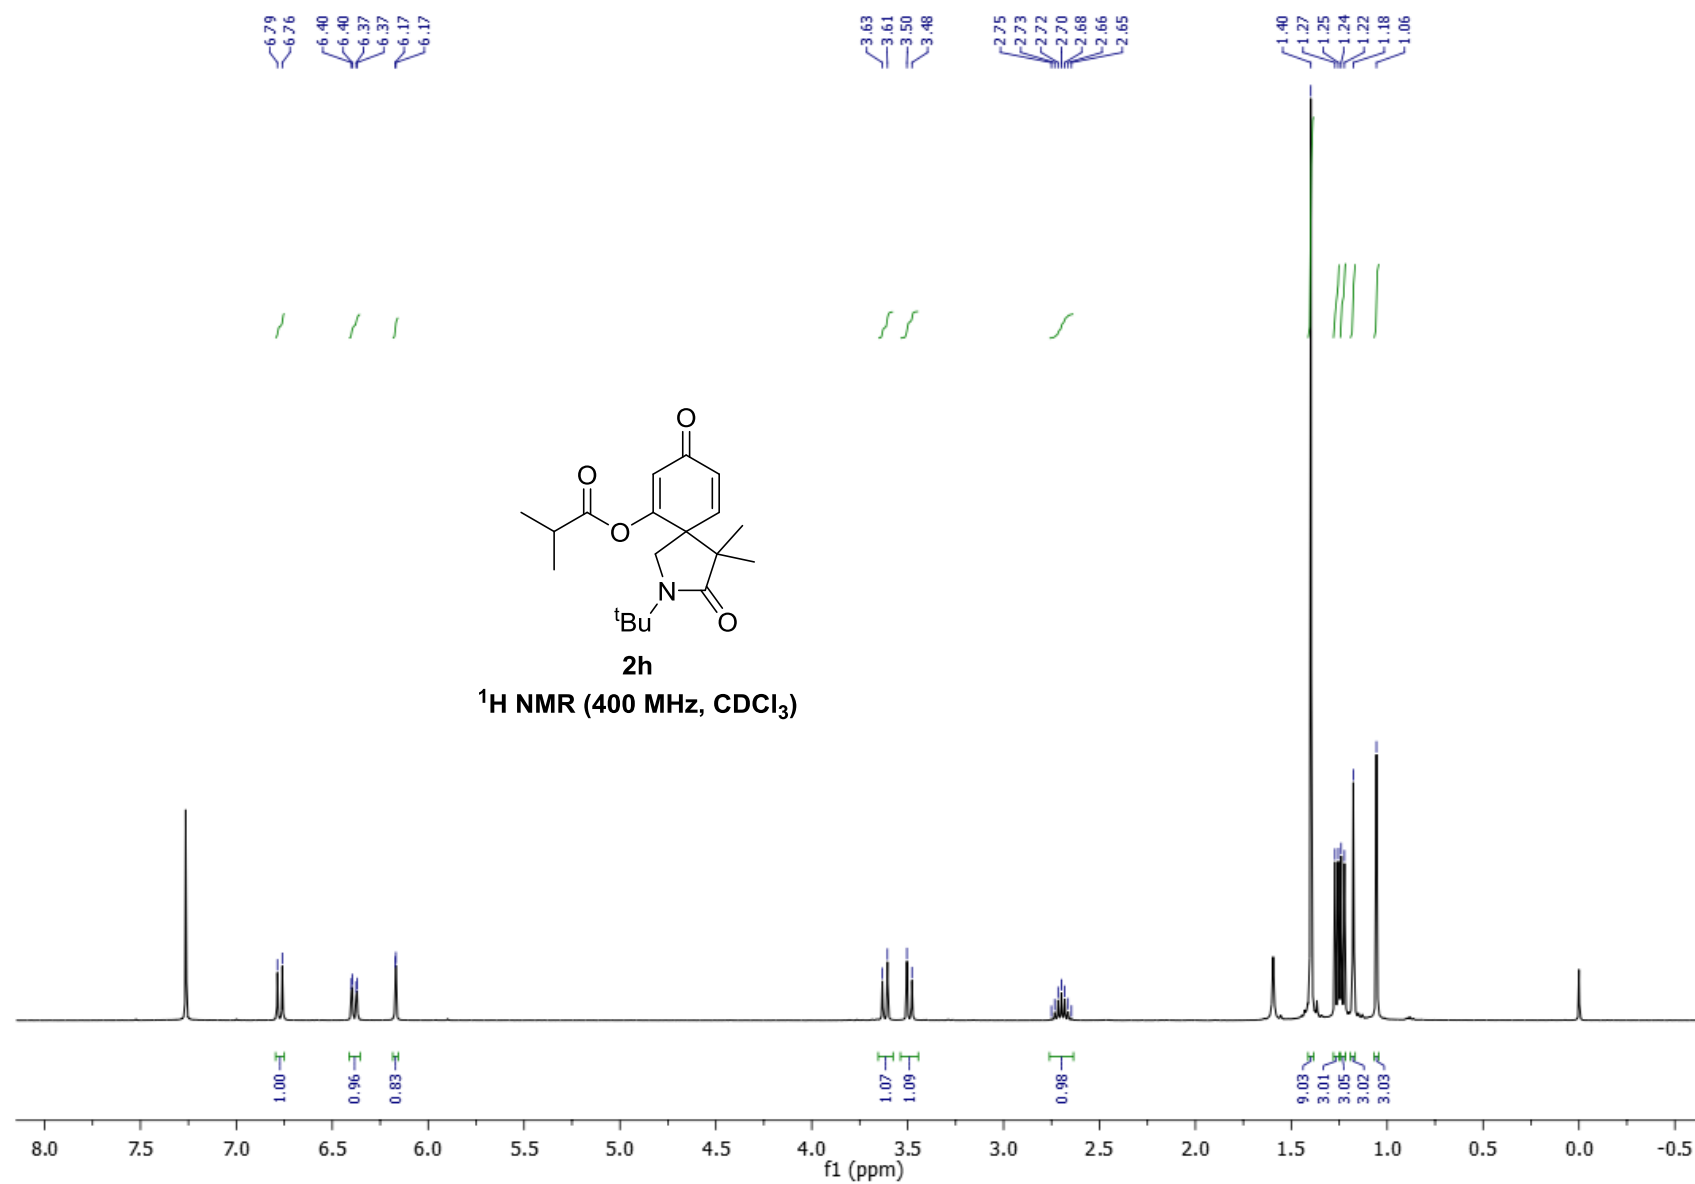

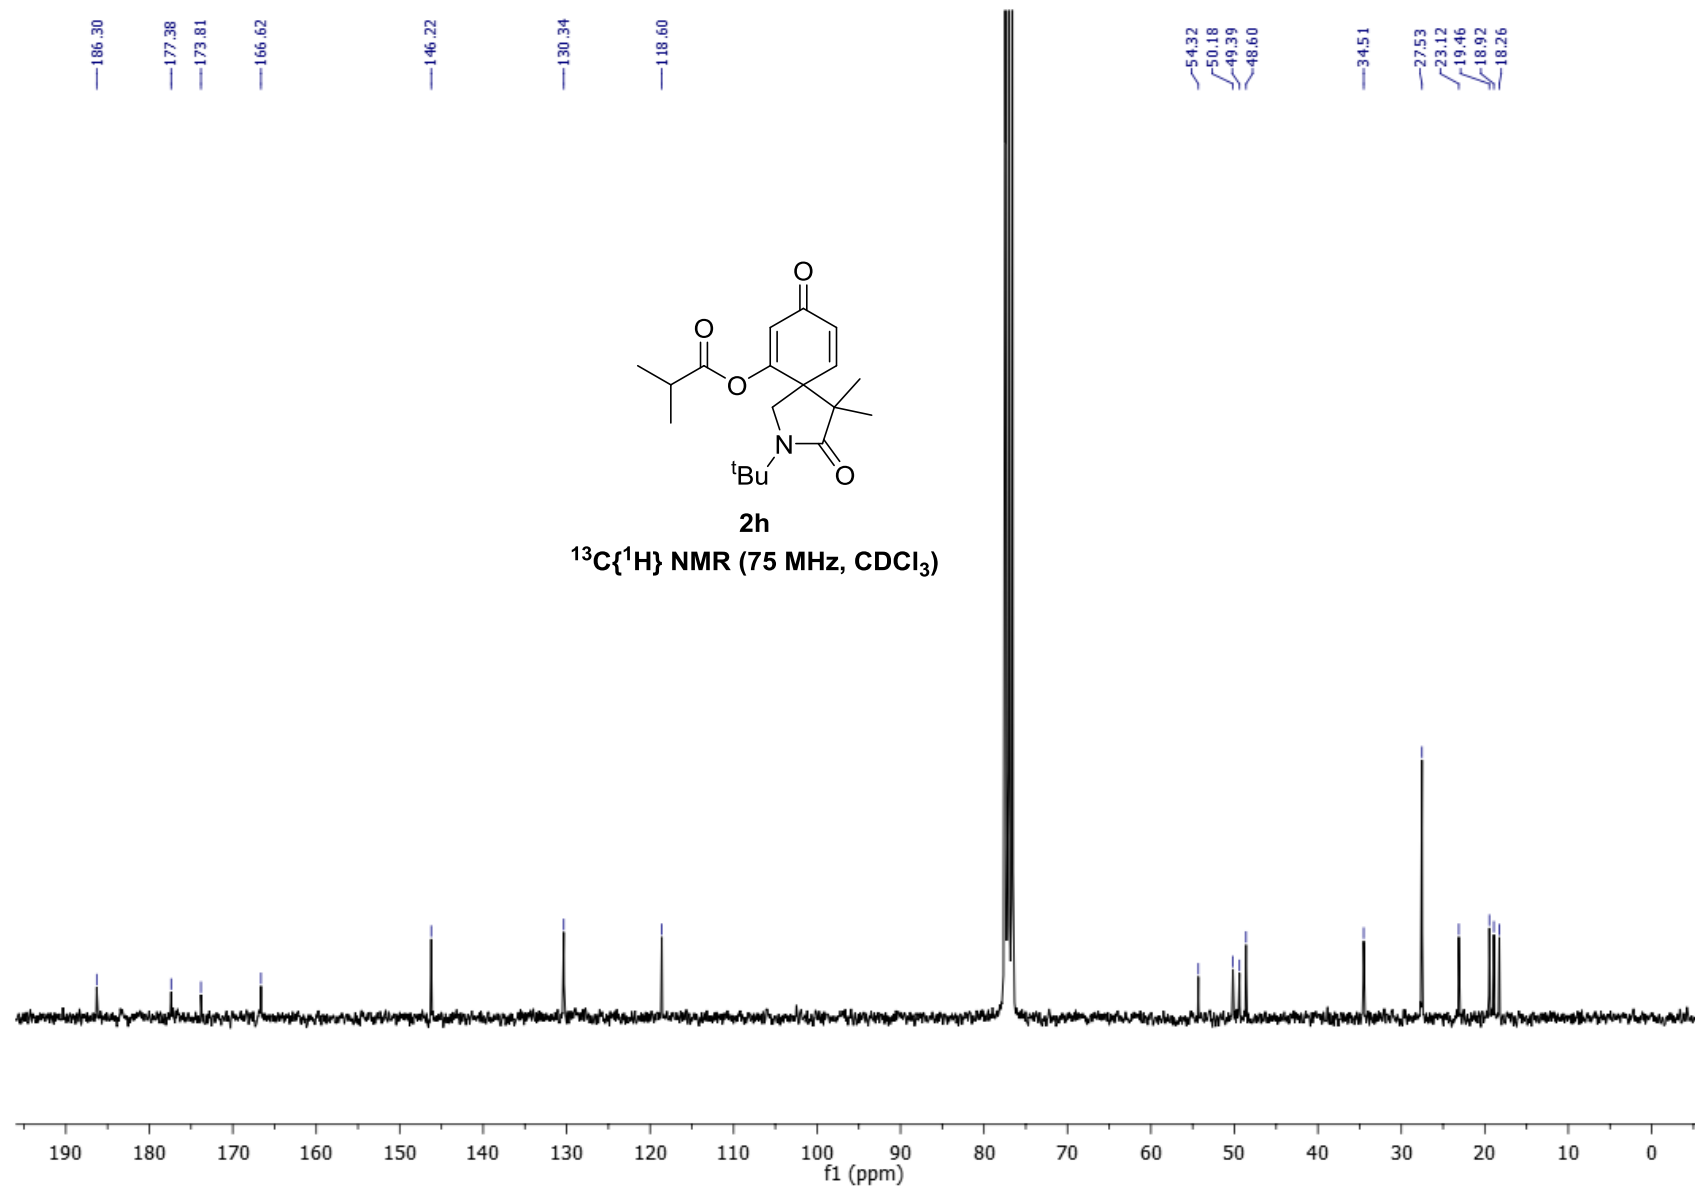

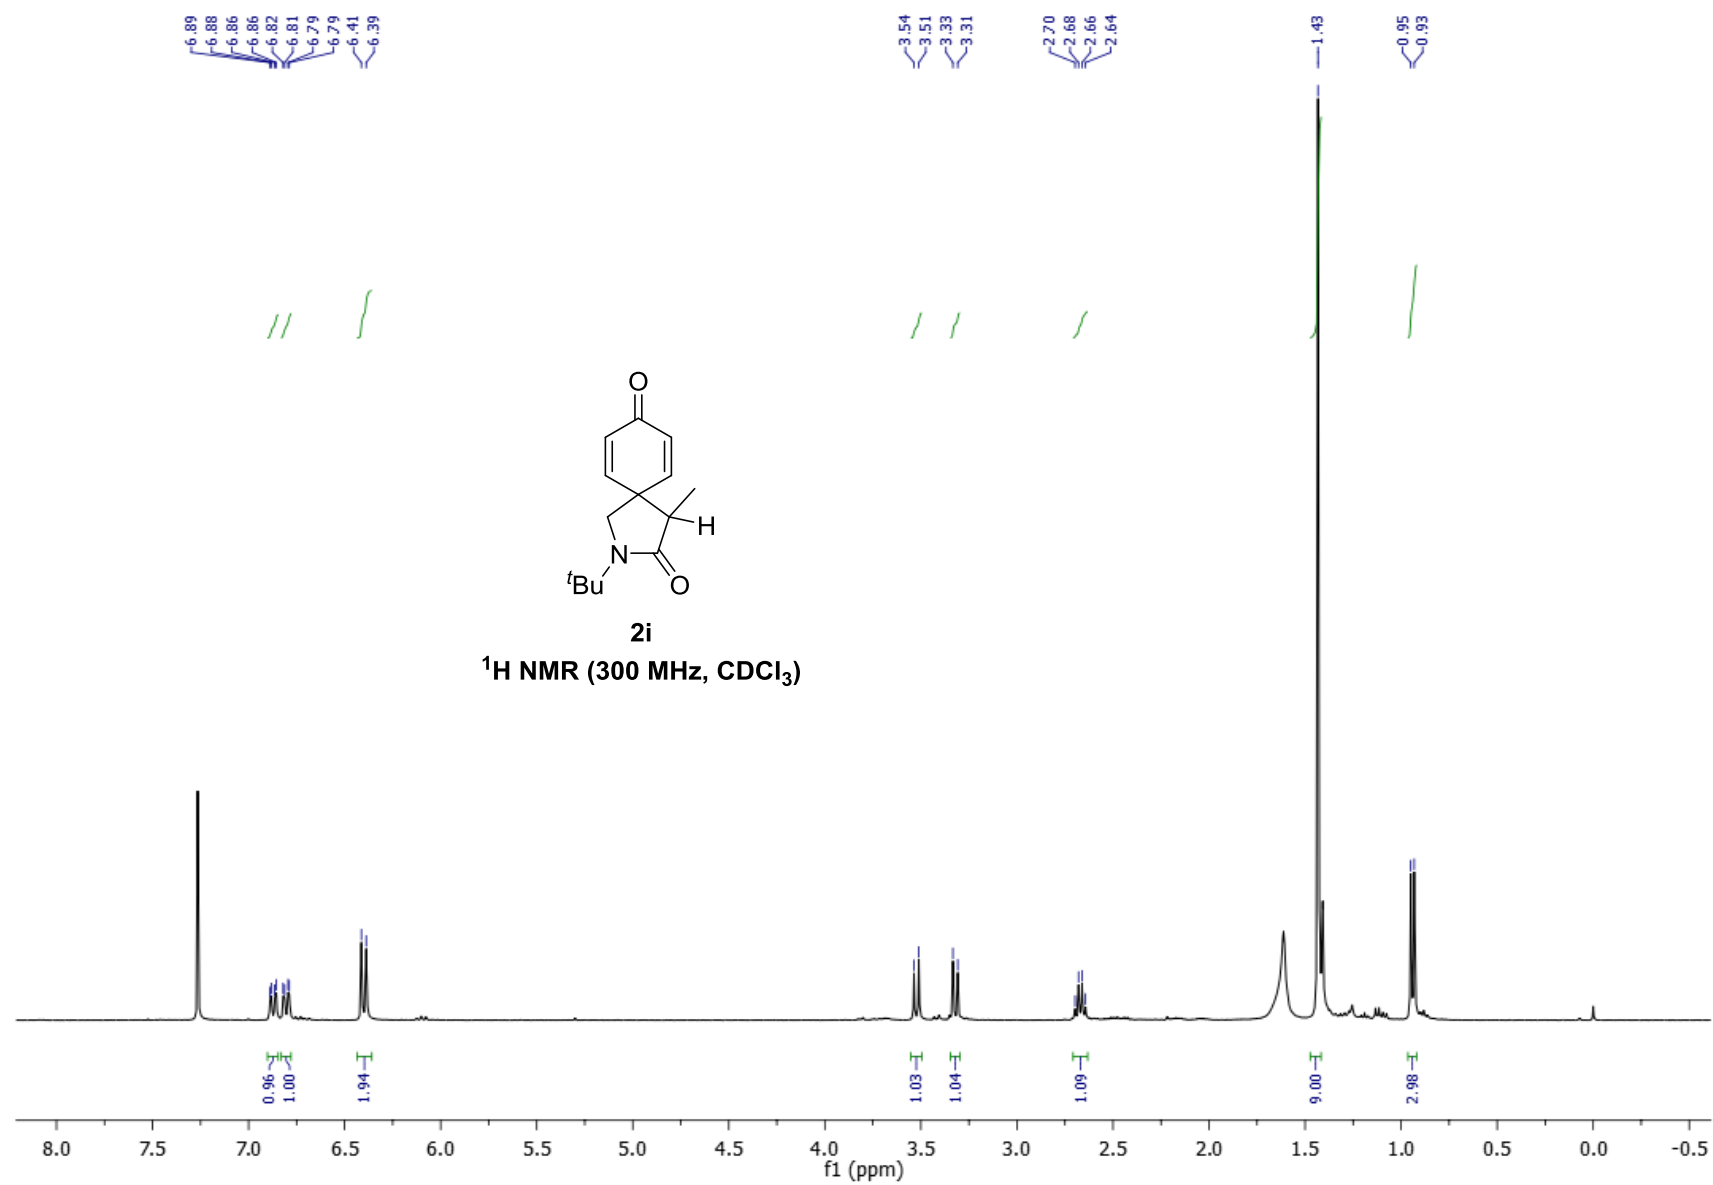

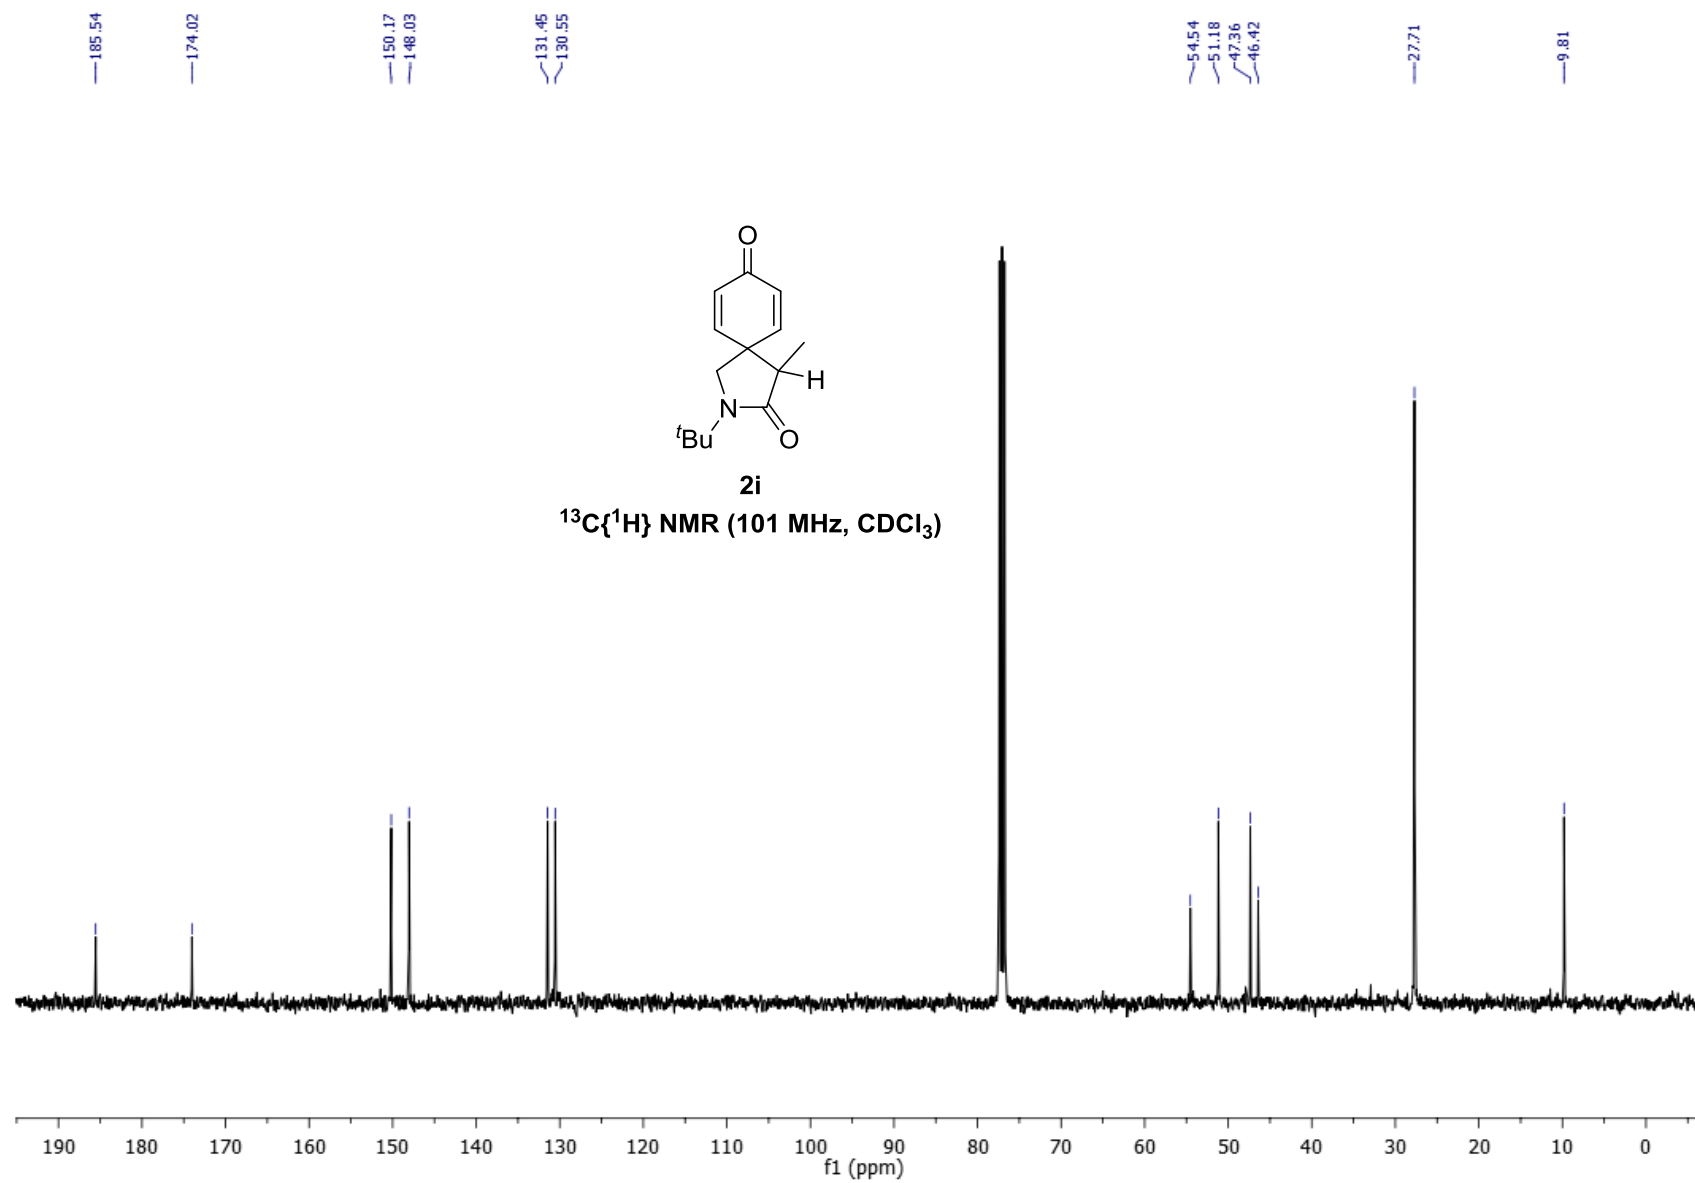

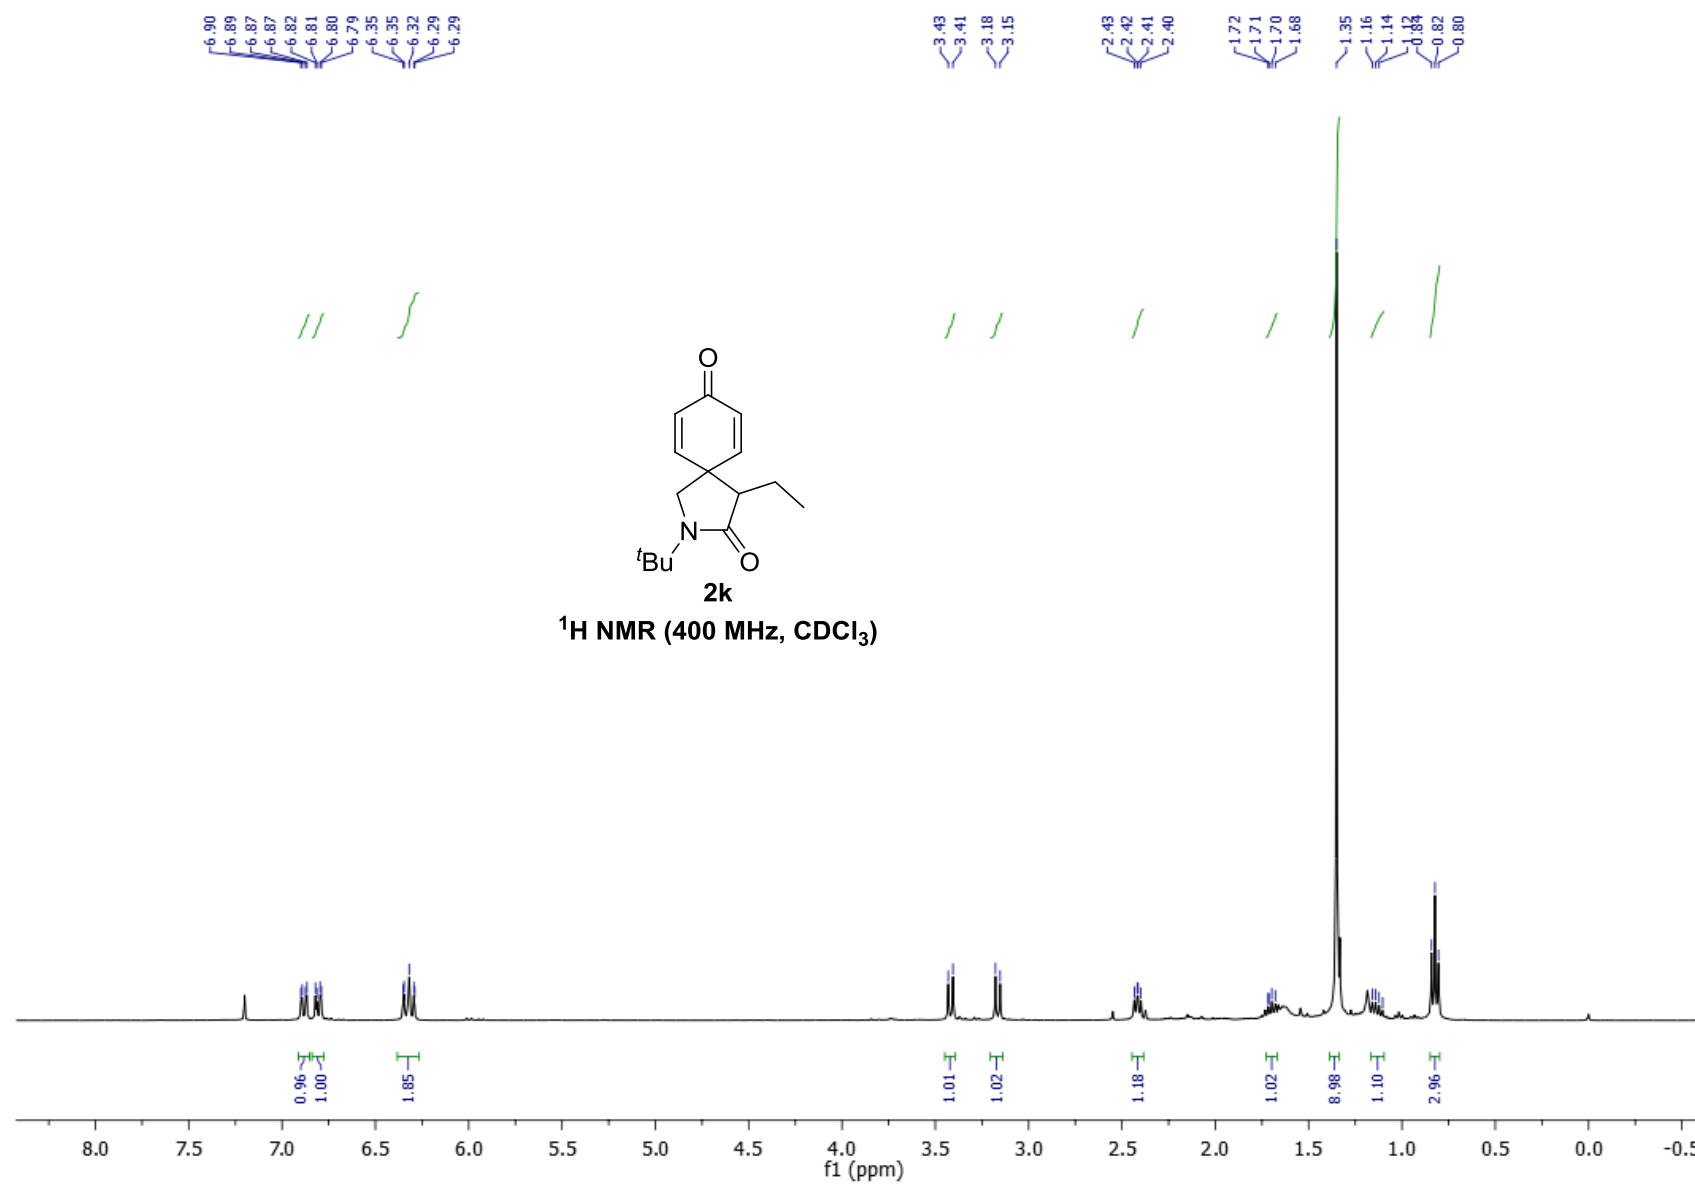

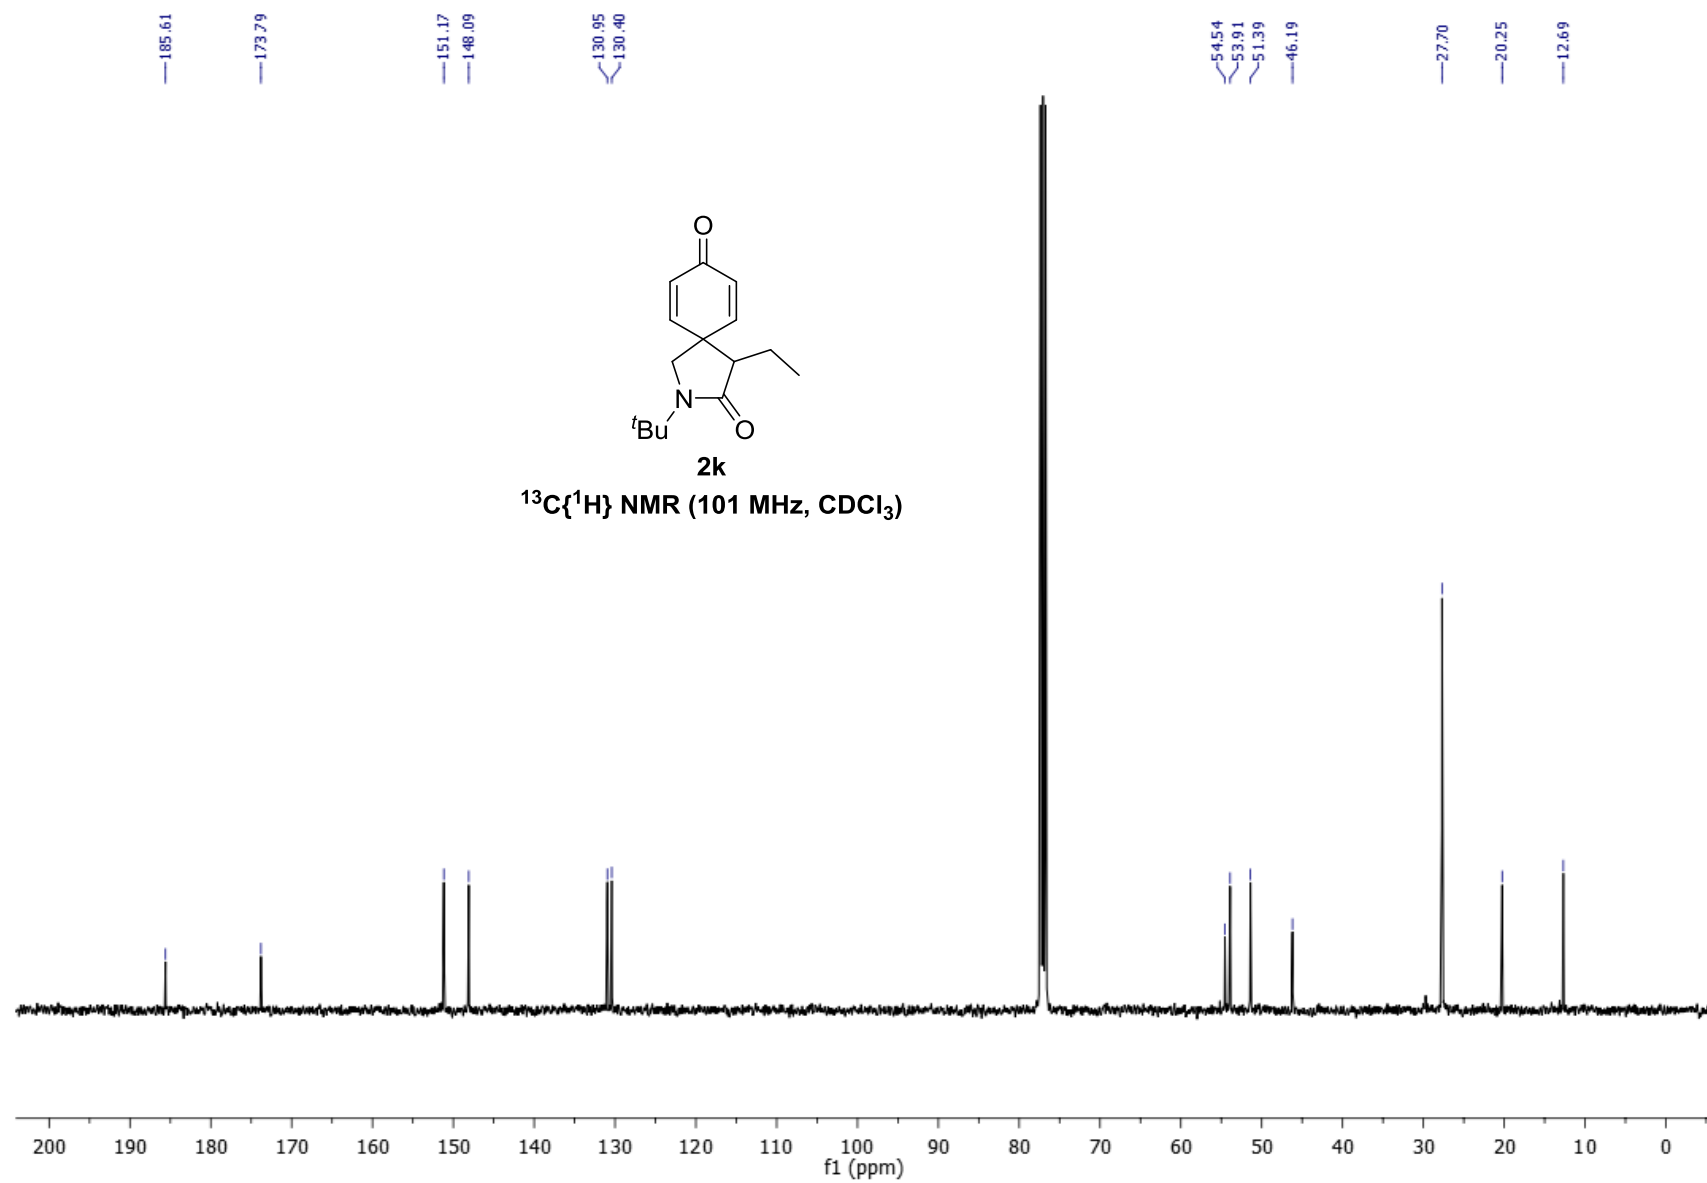

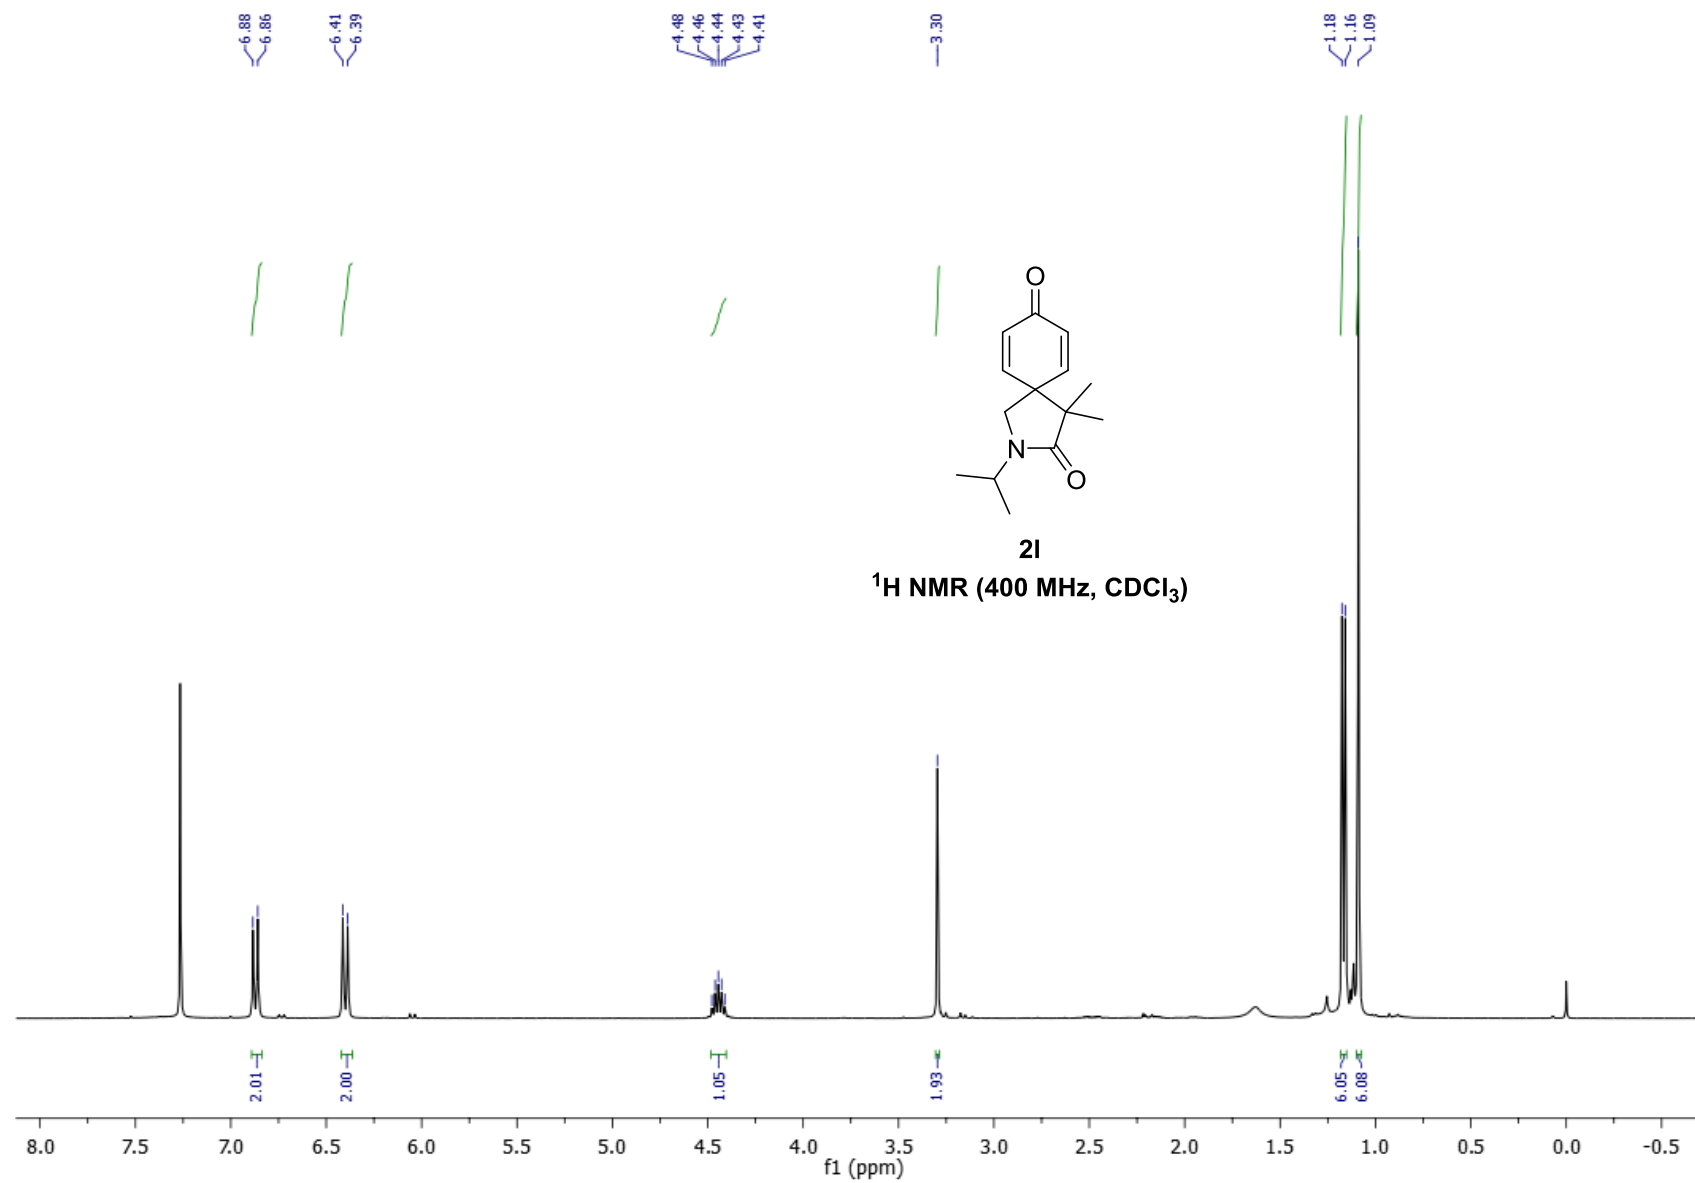

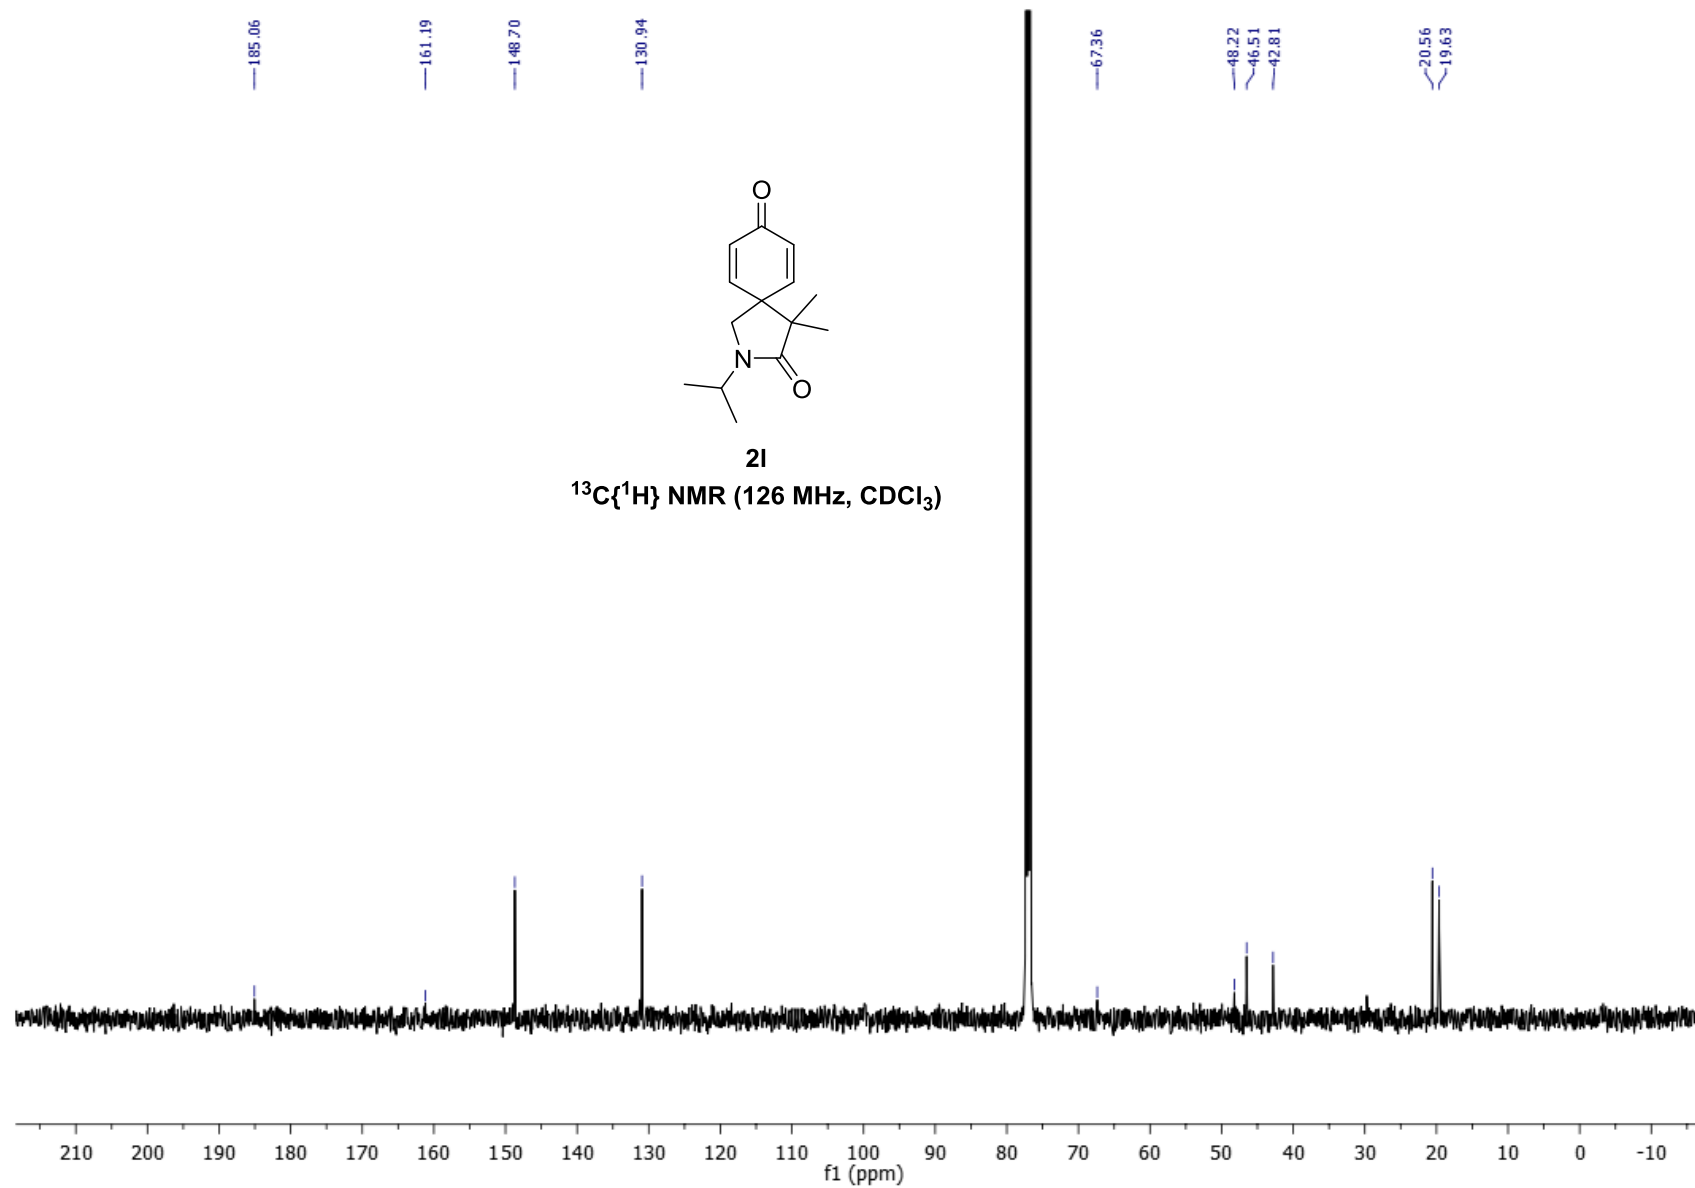

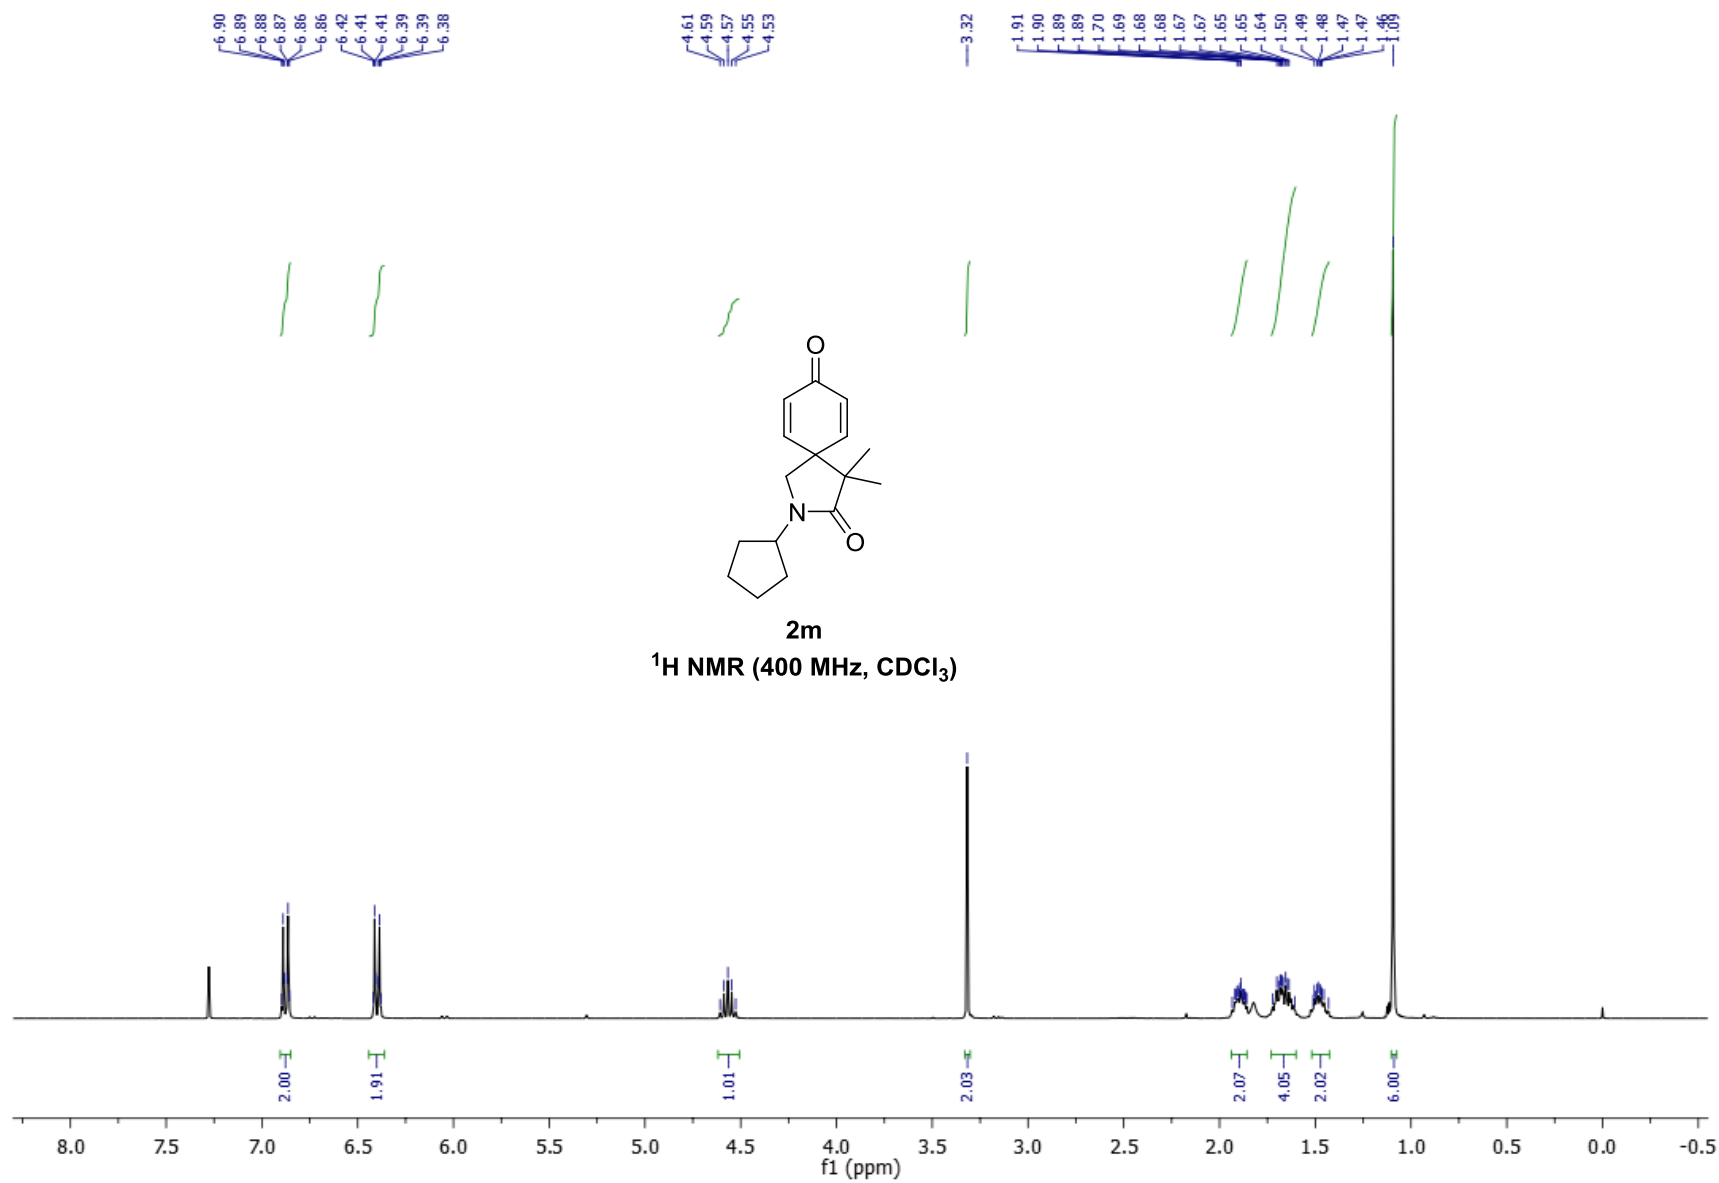

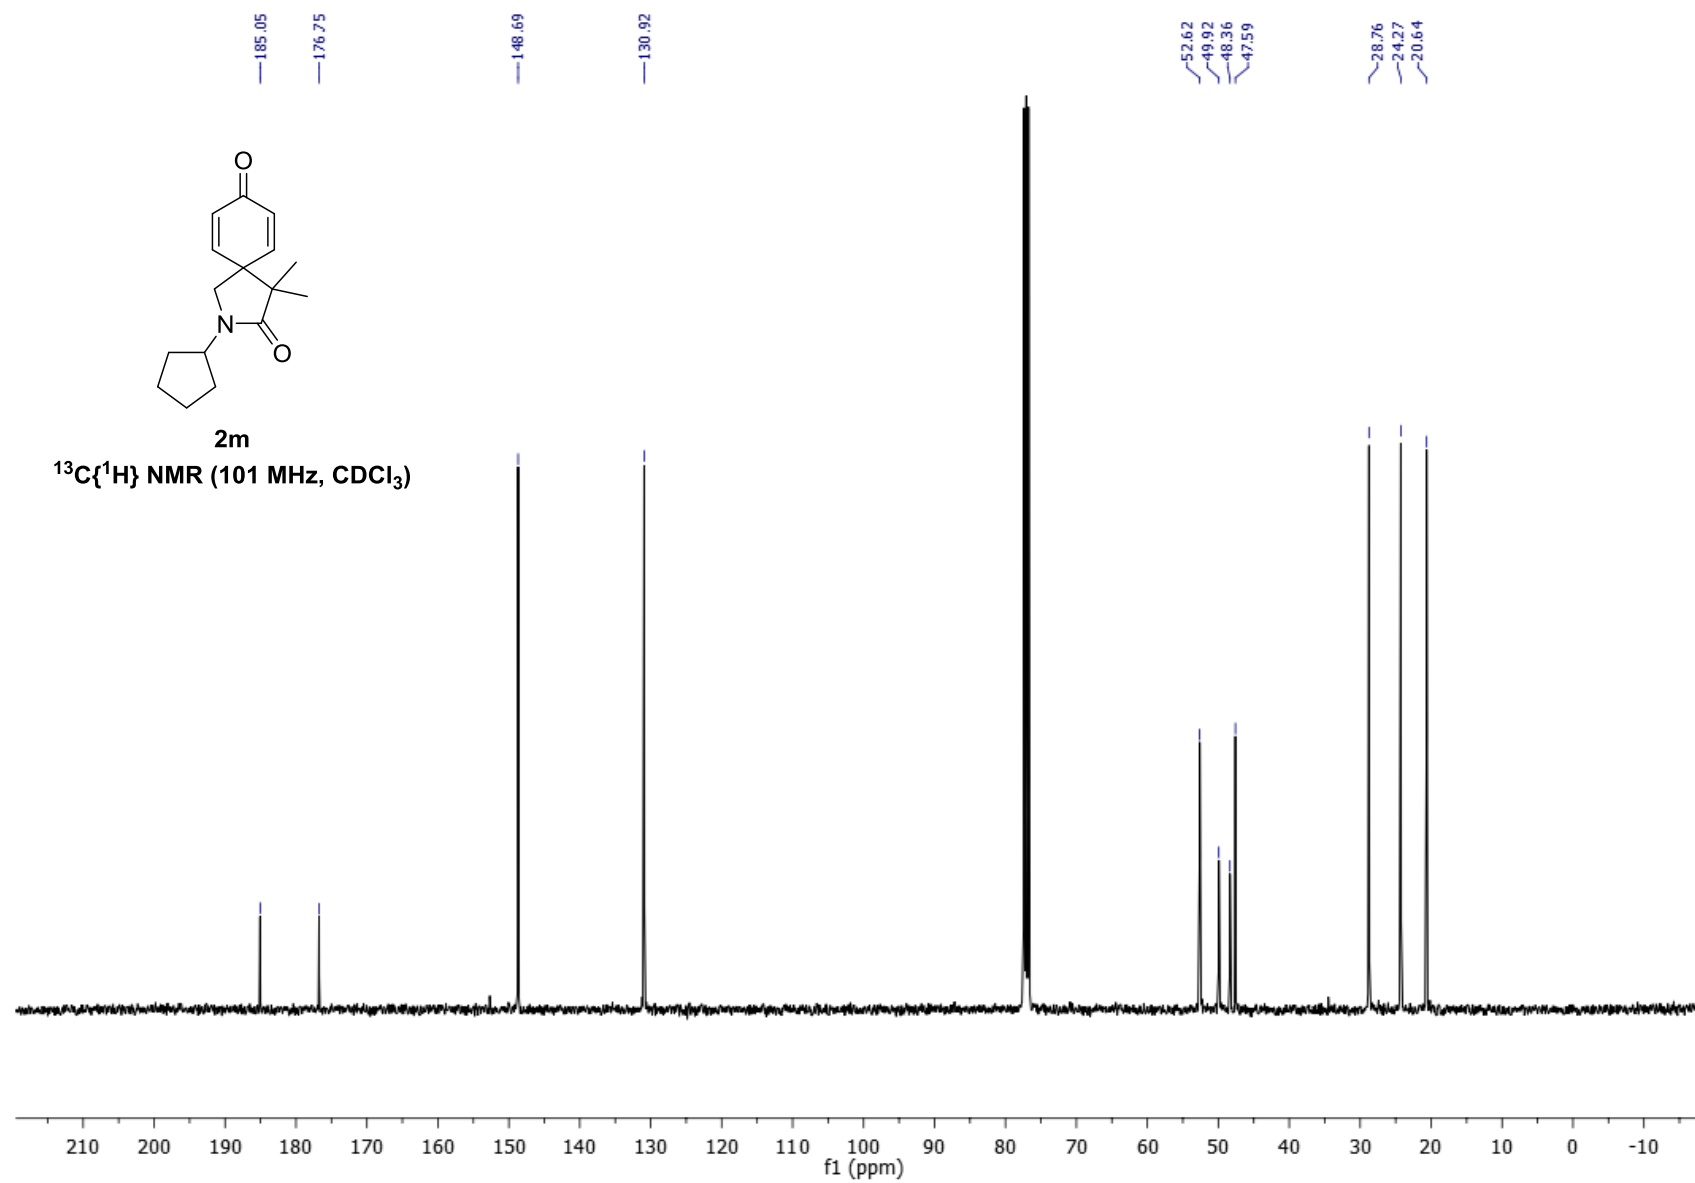

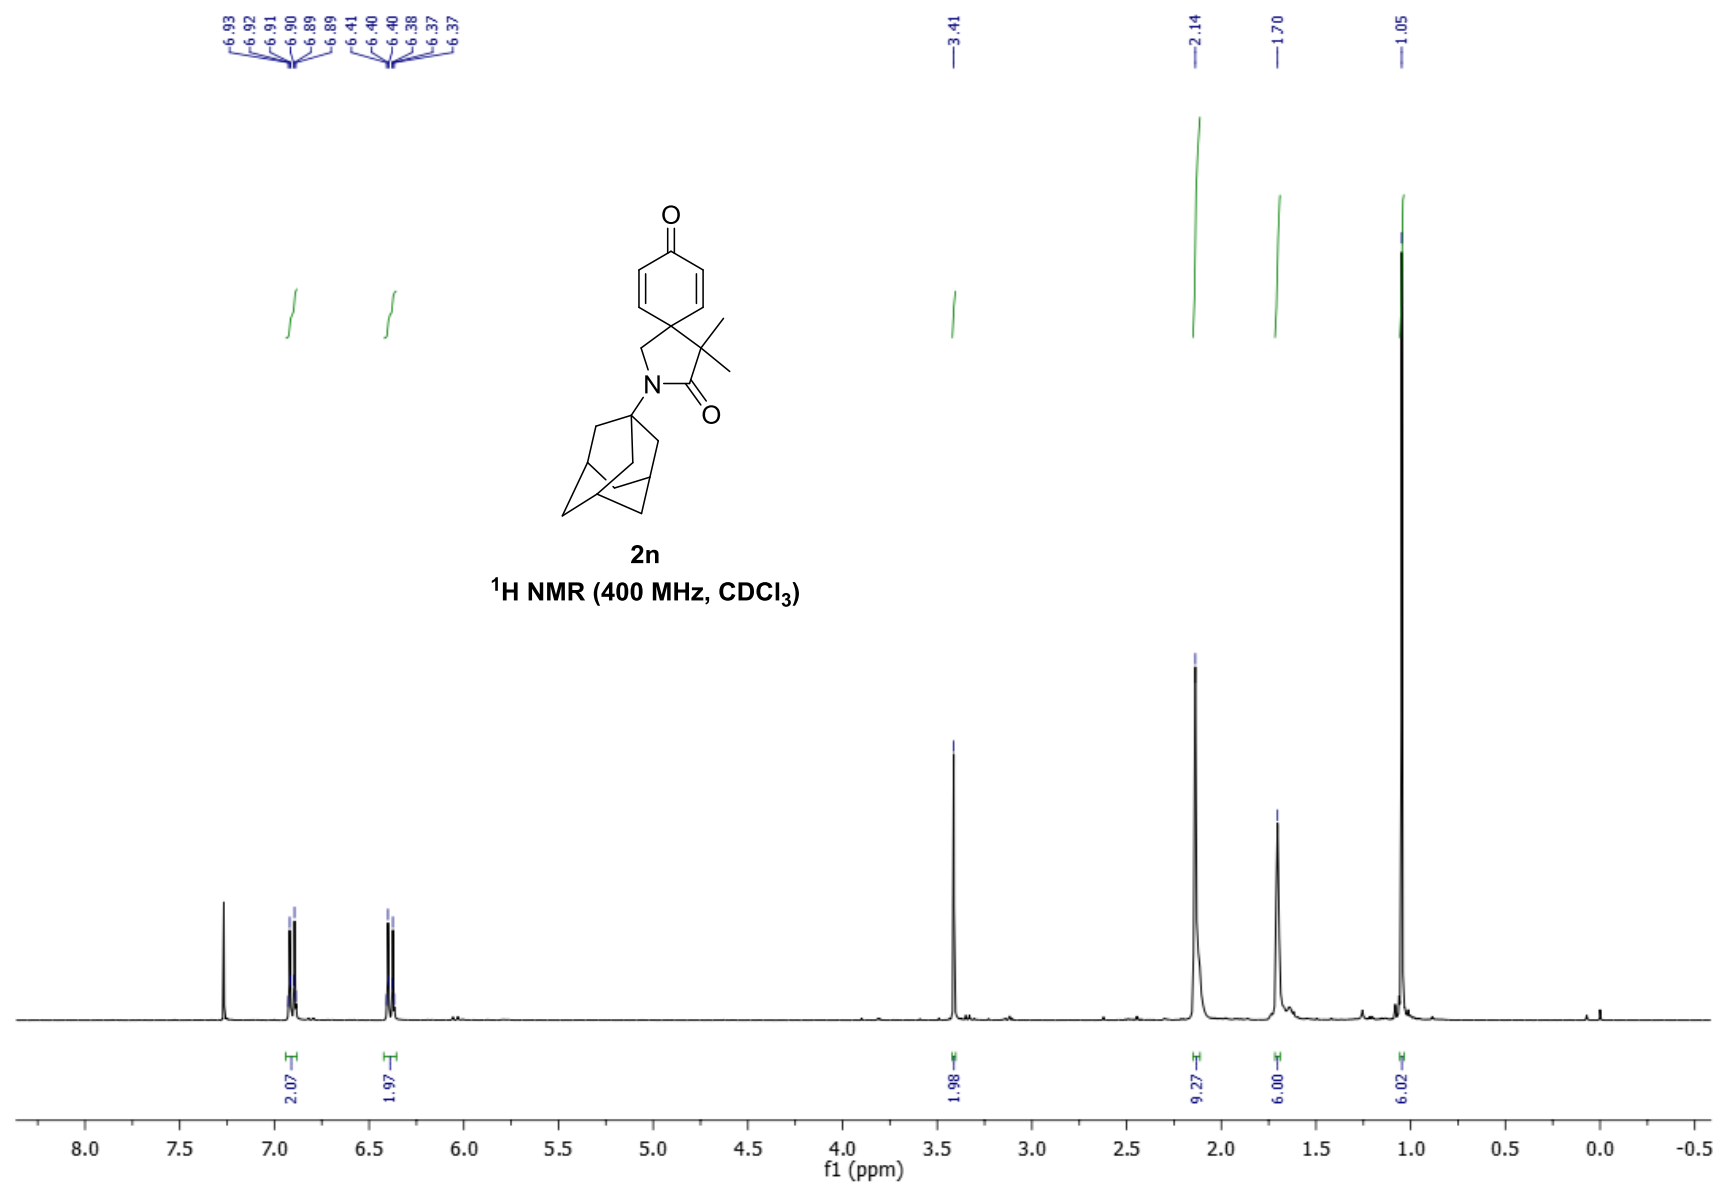

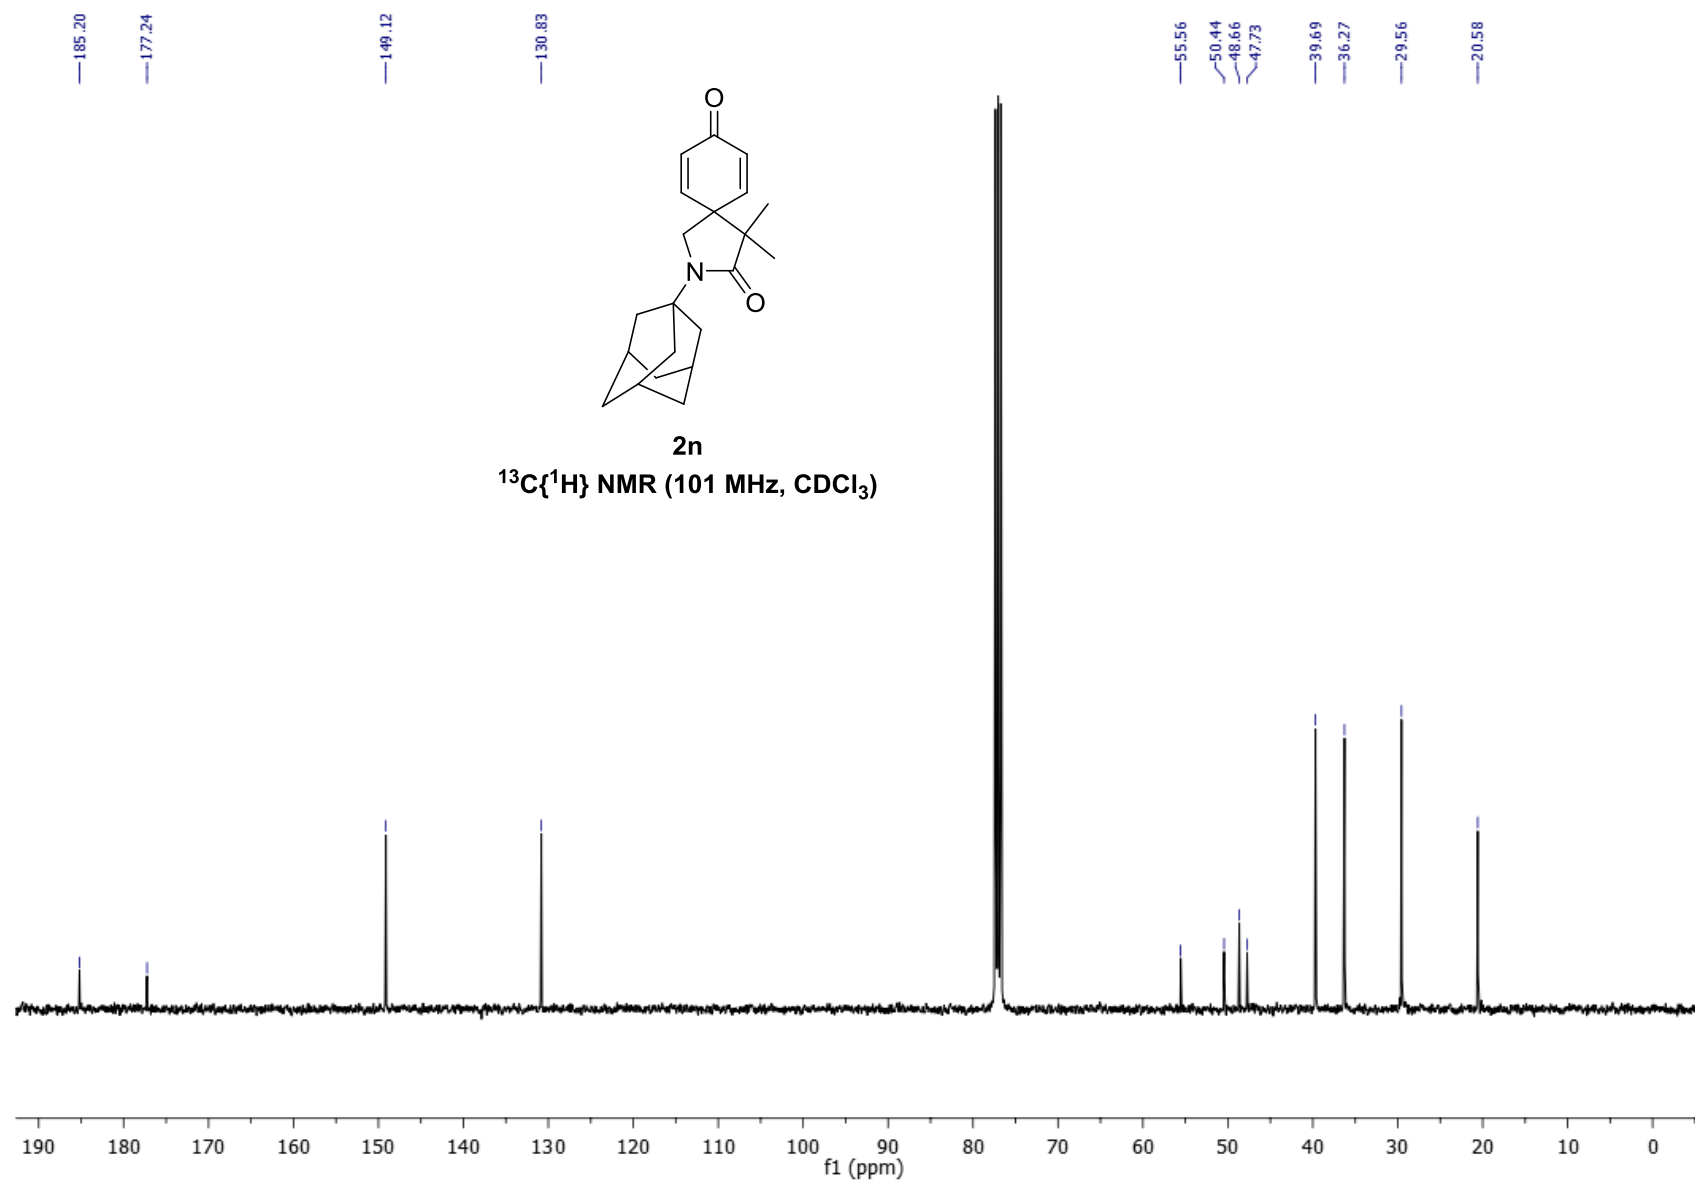

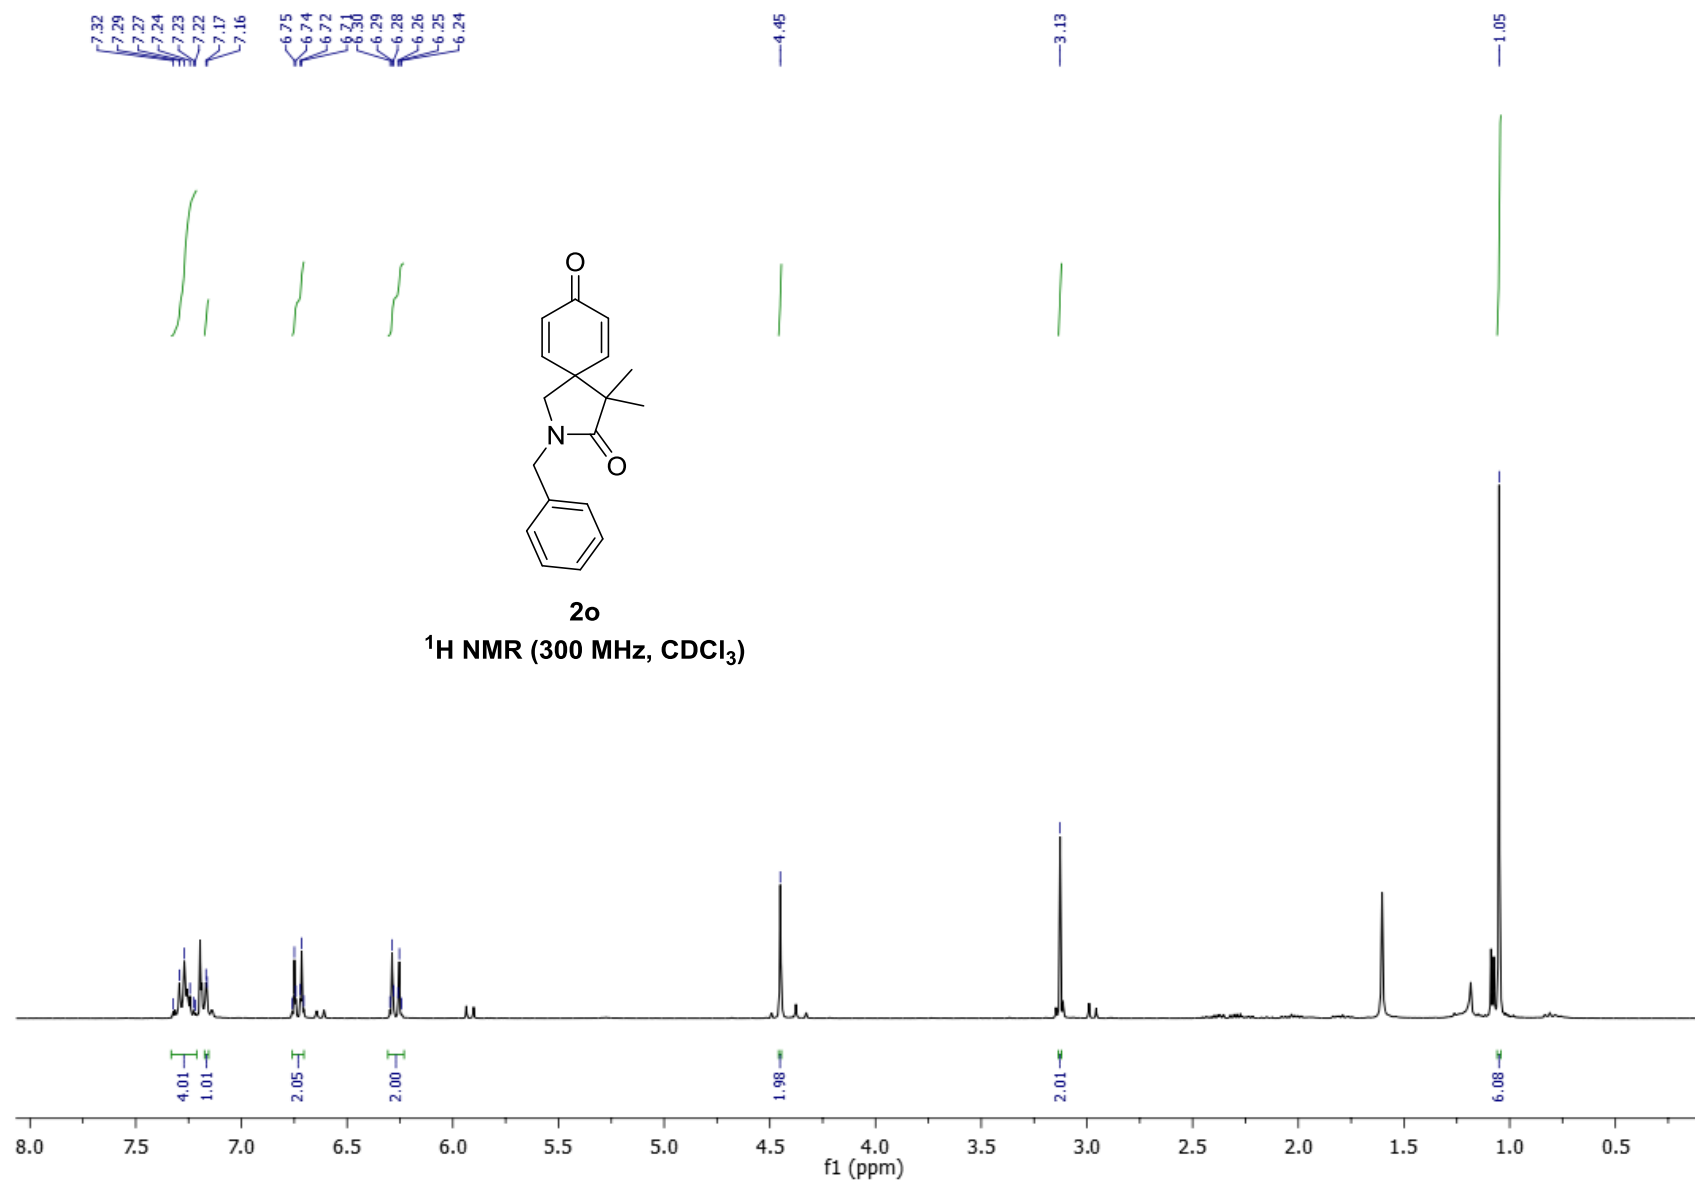

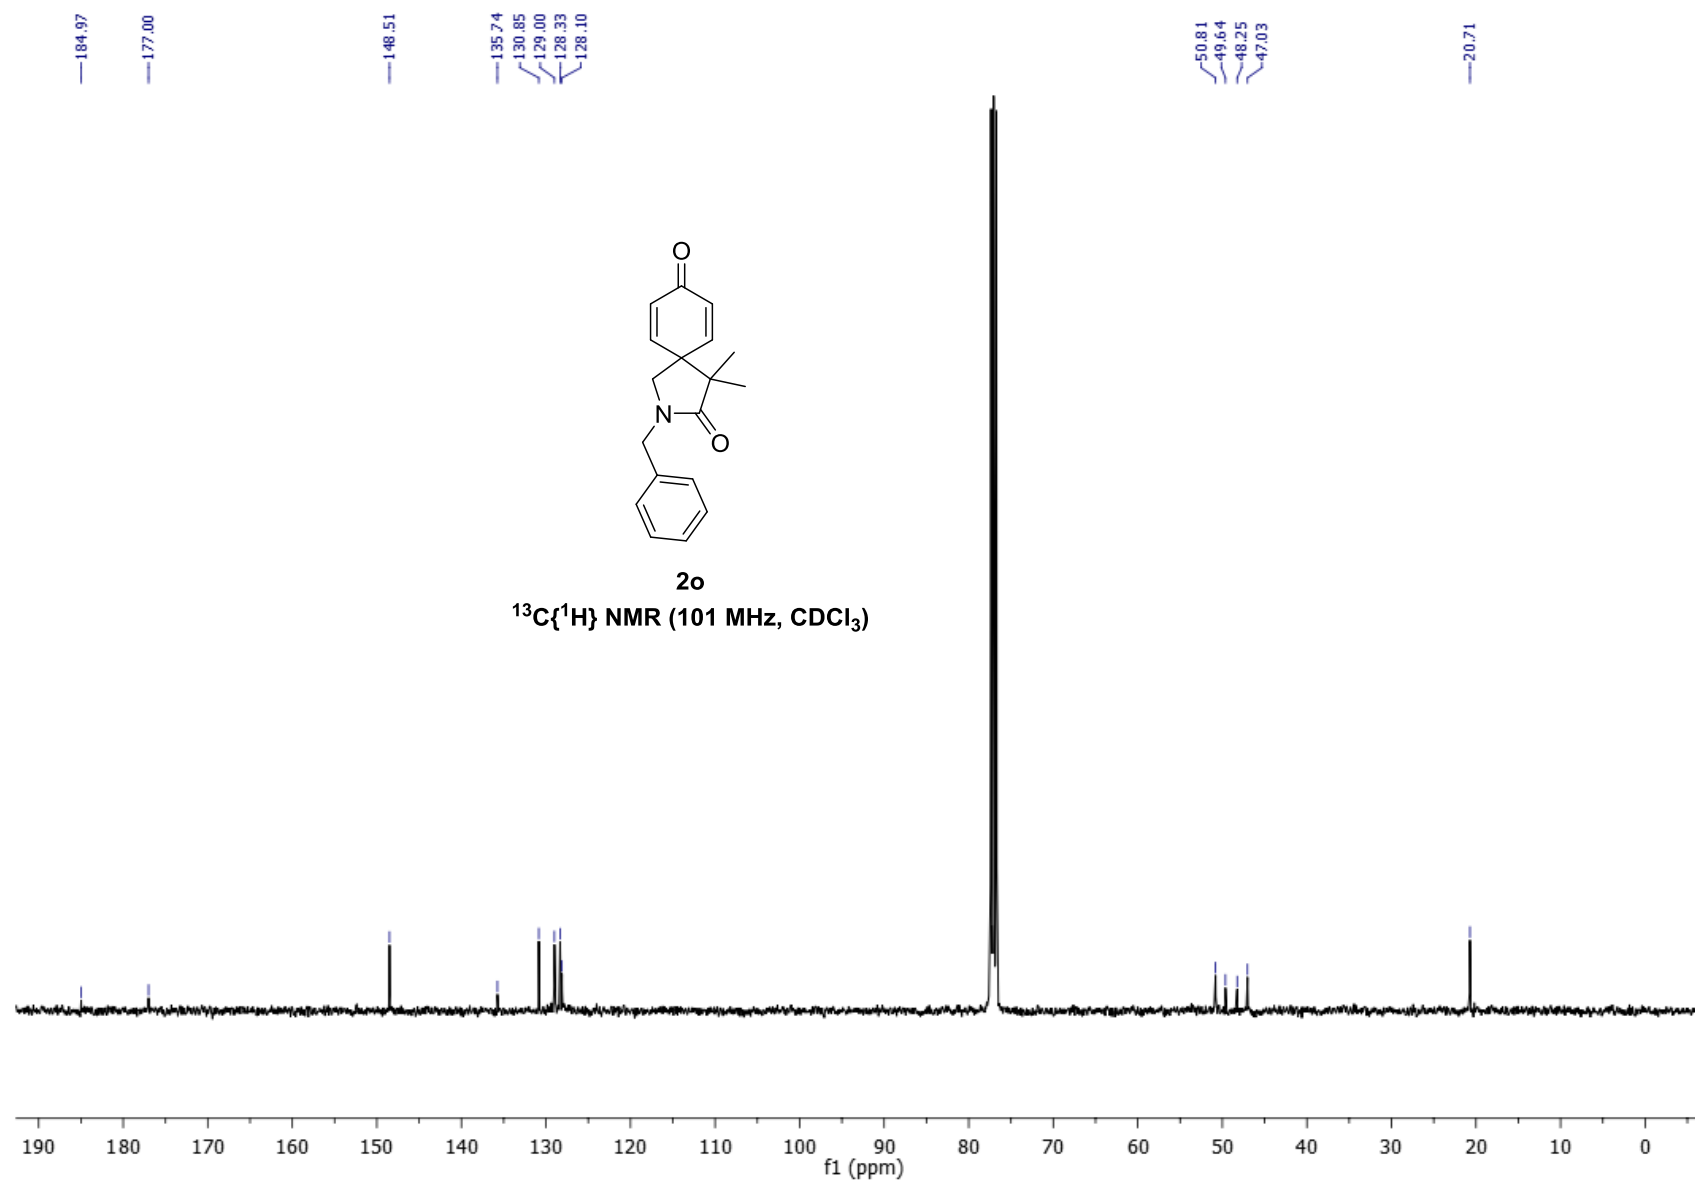

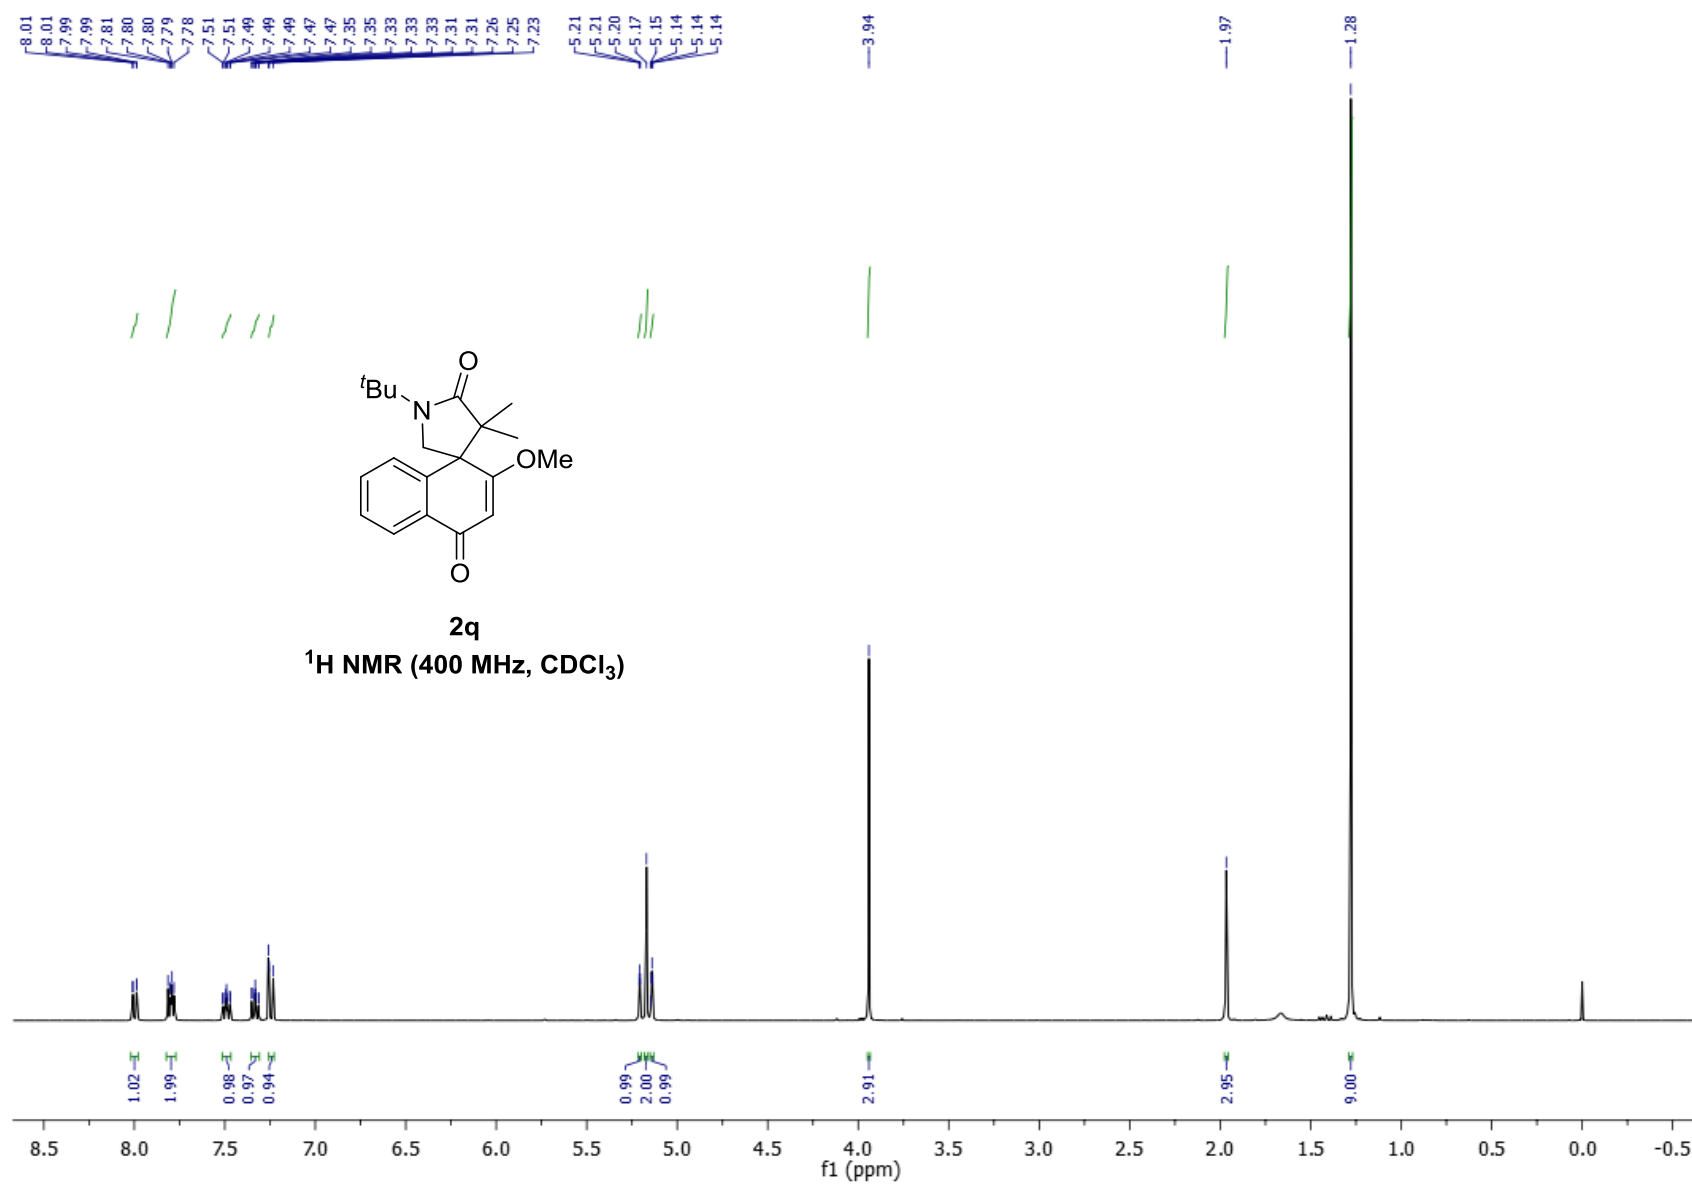

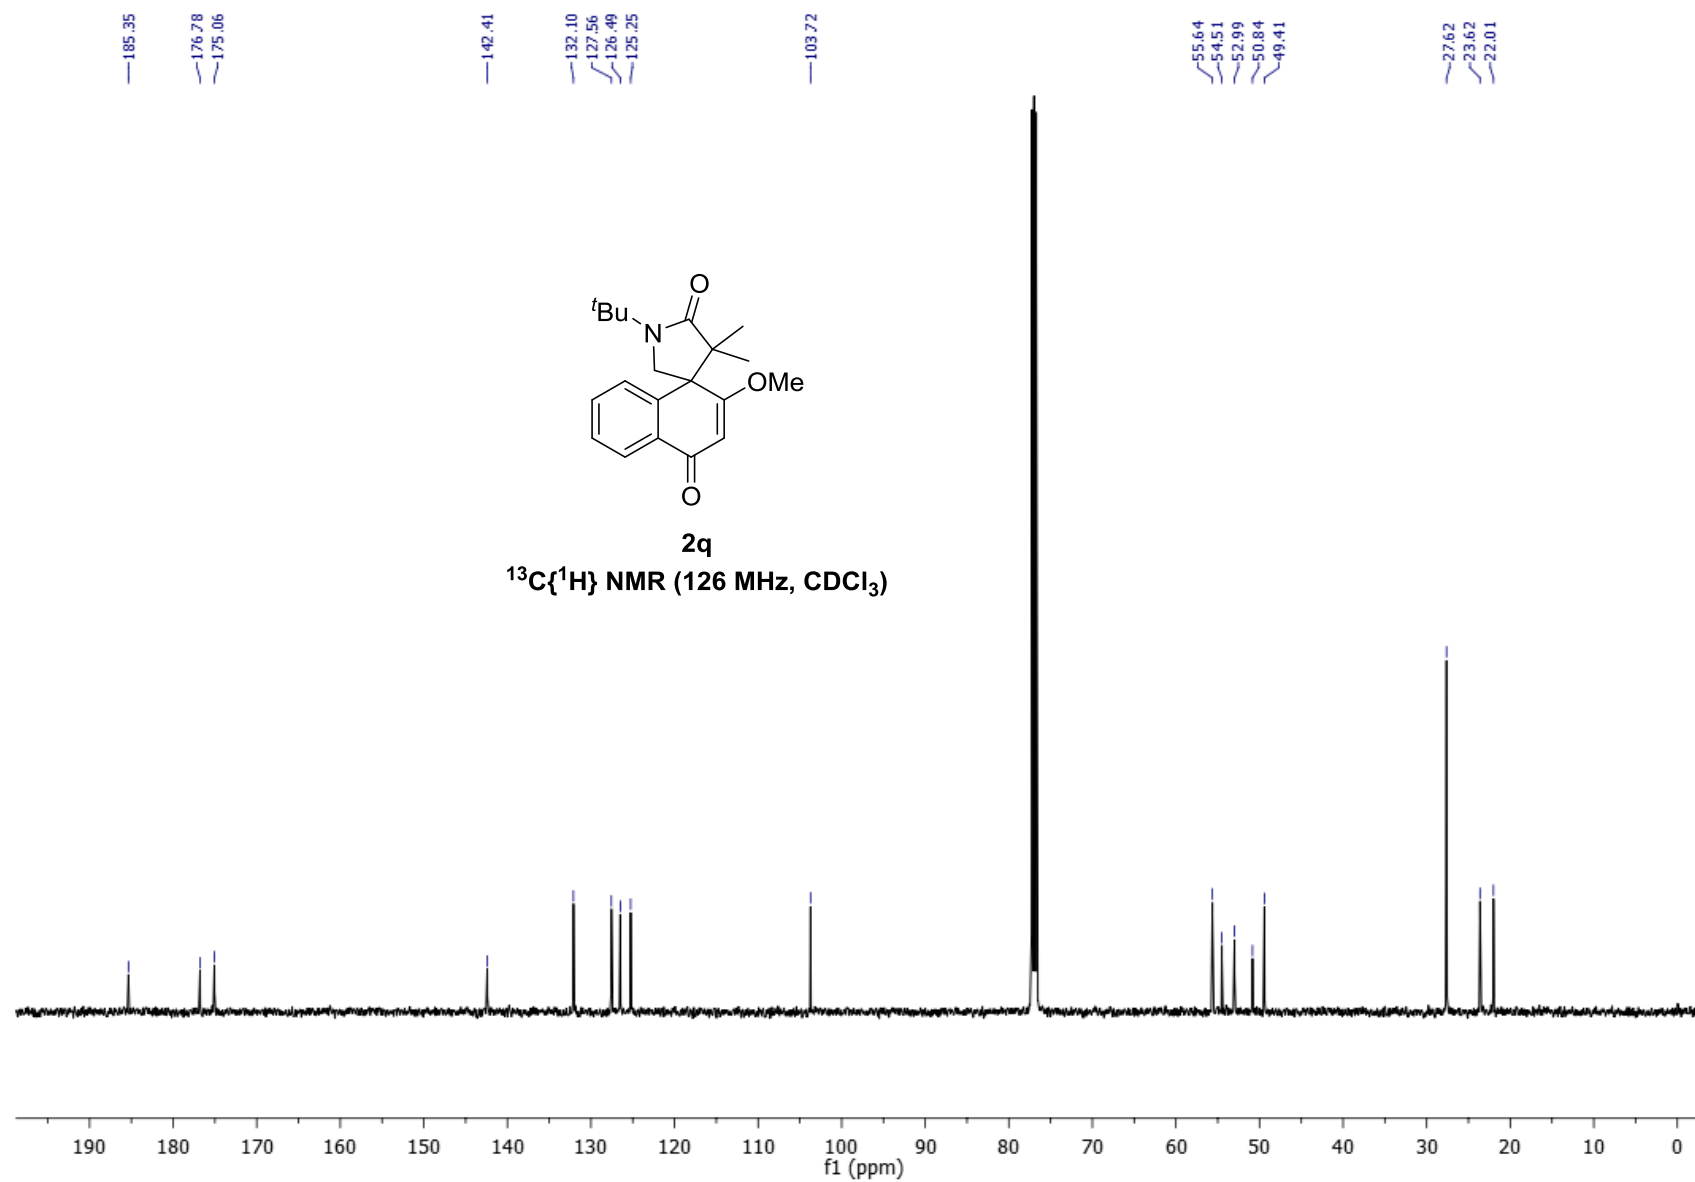

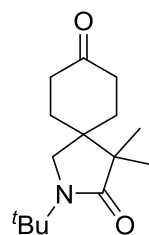

**3**

$^1\text{H}$  NMR (300 MHz,  $\text{CDCl}_3$ )

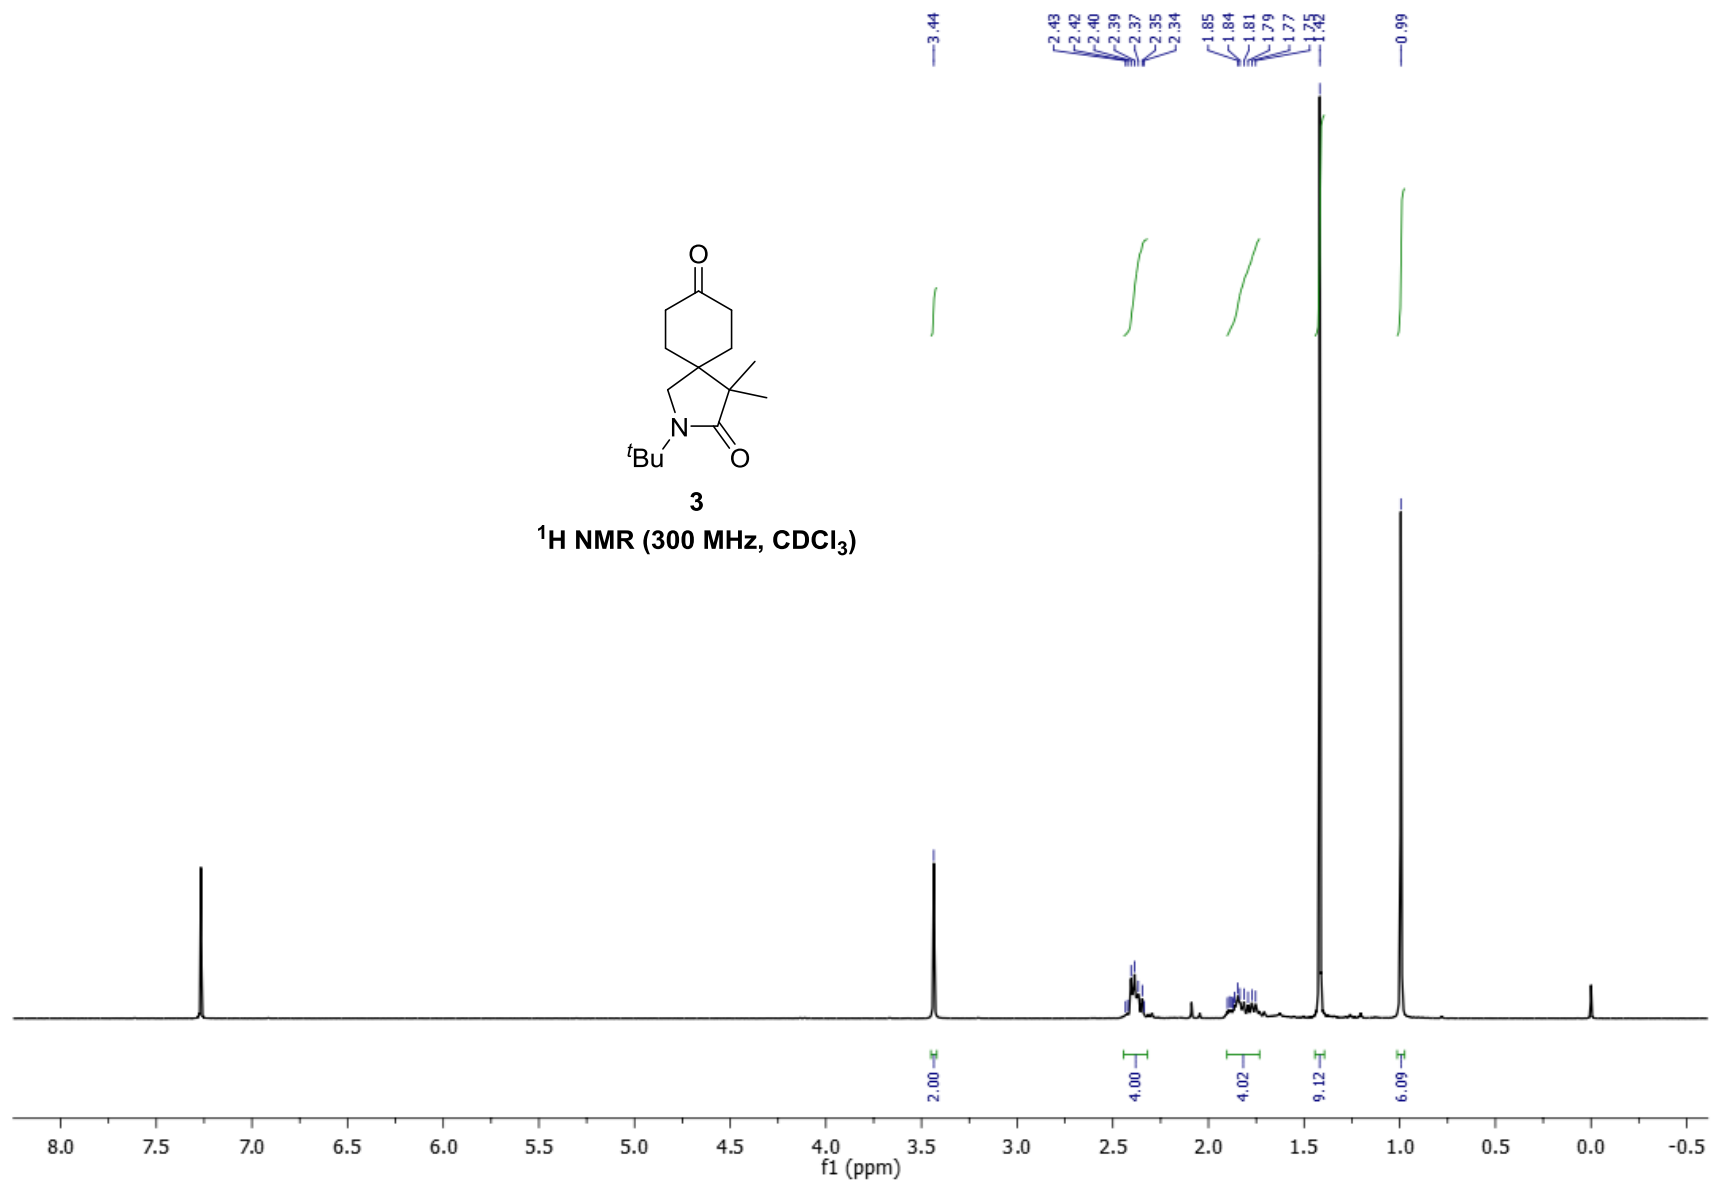

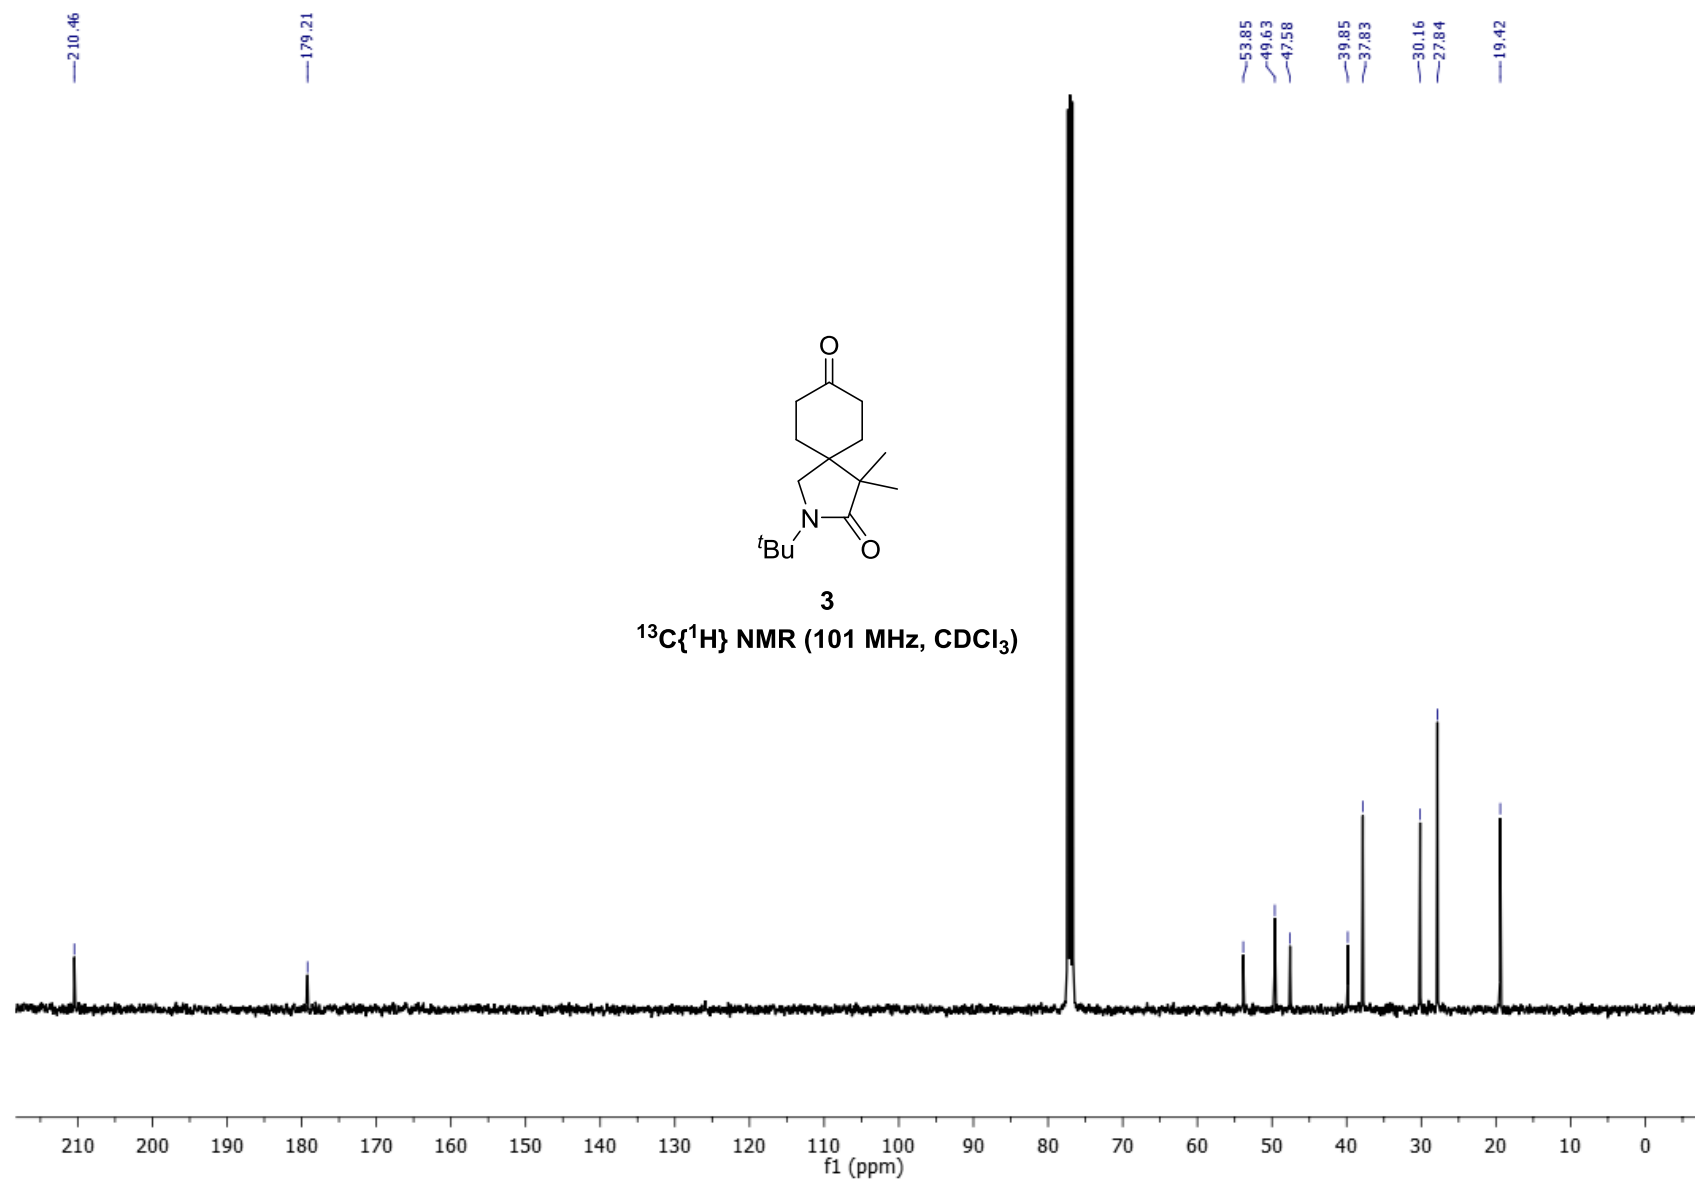

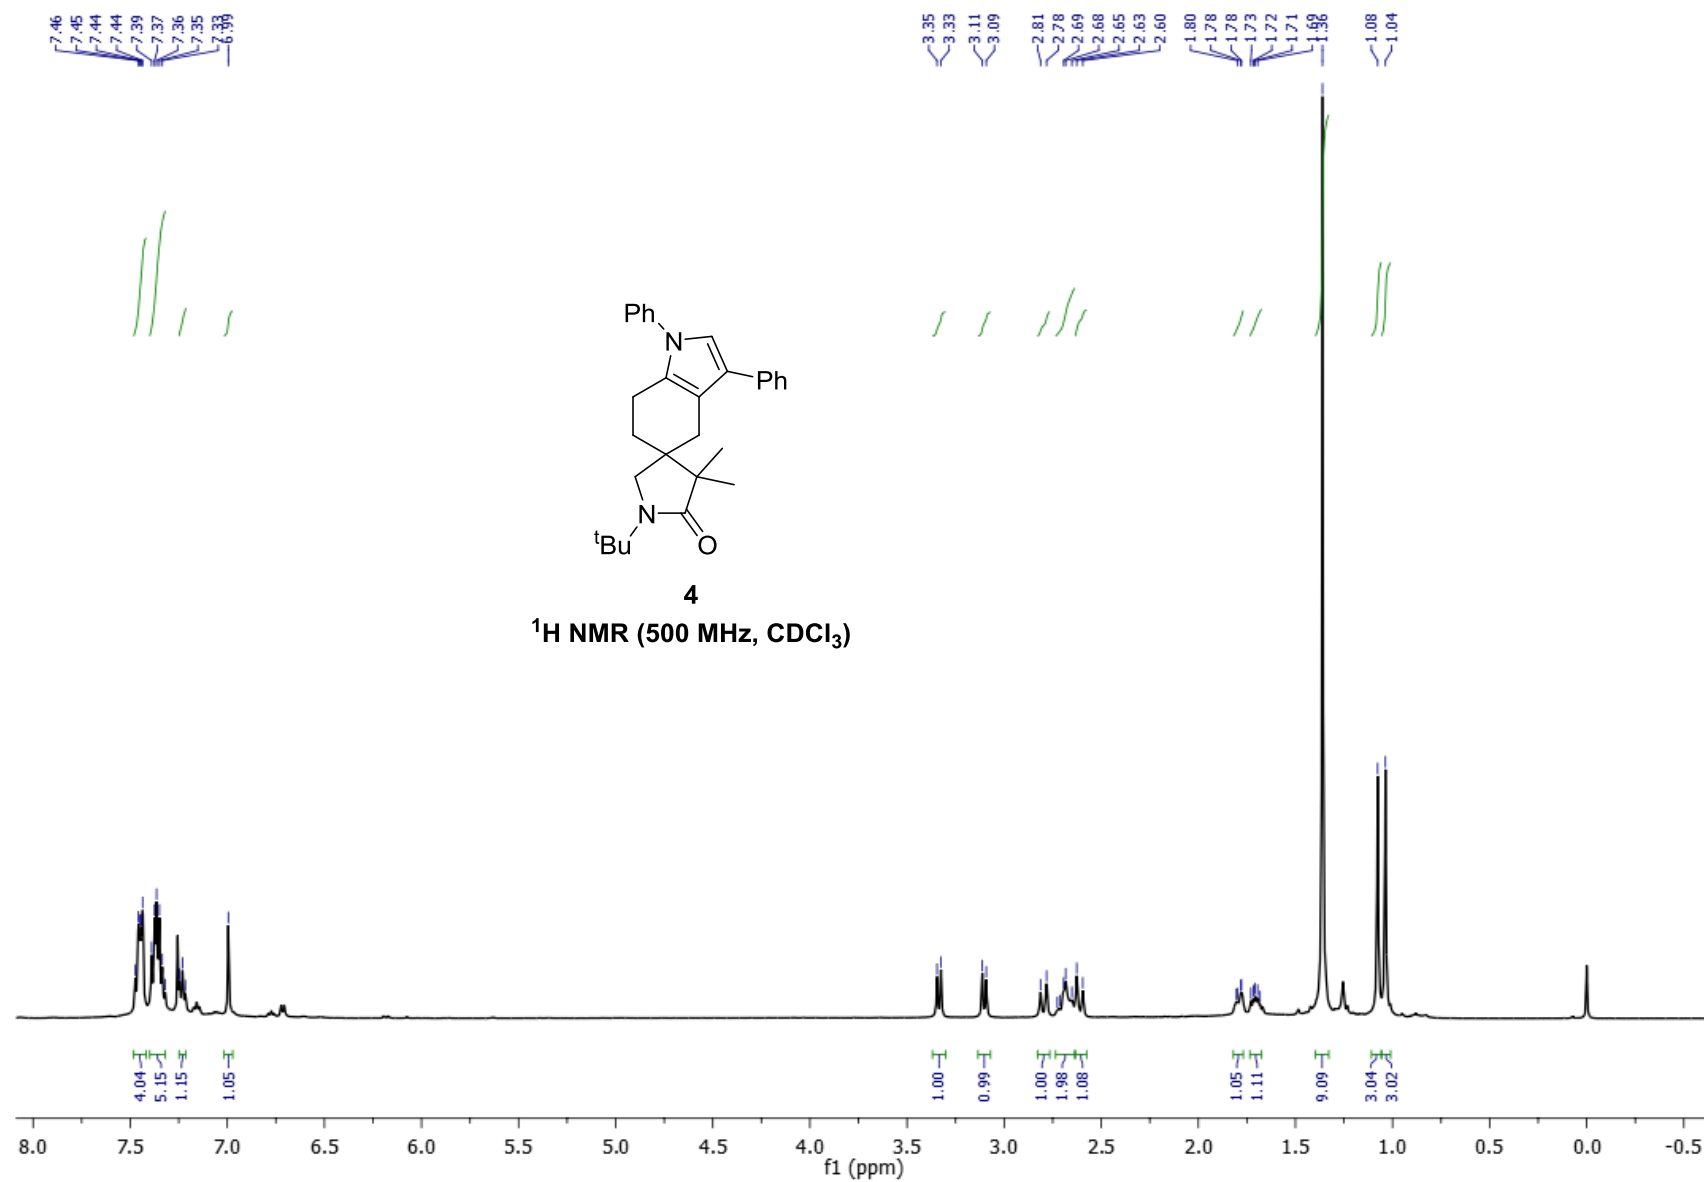

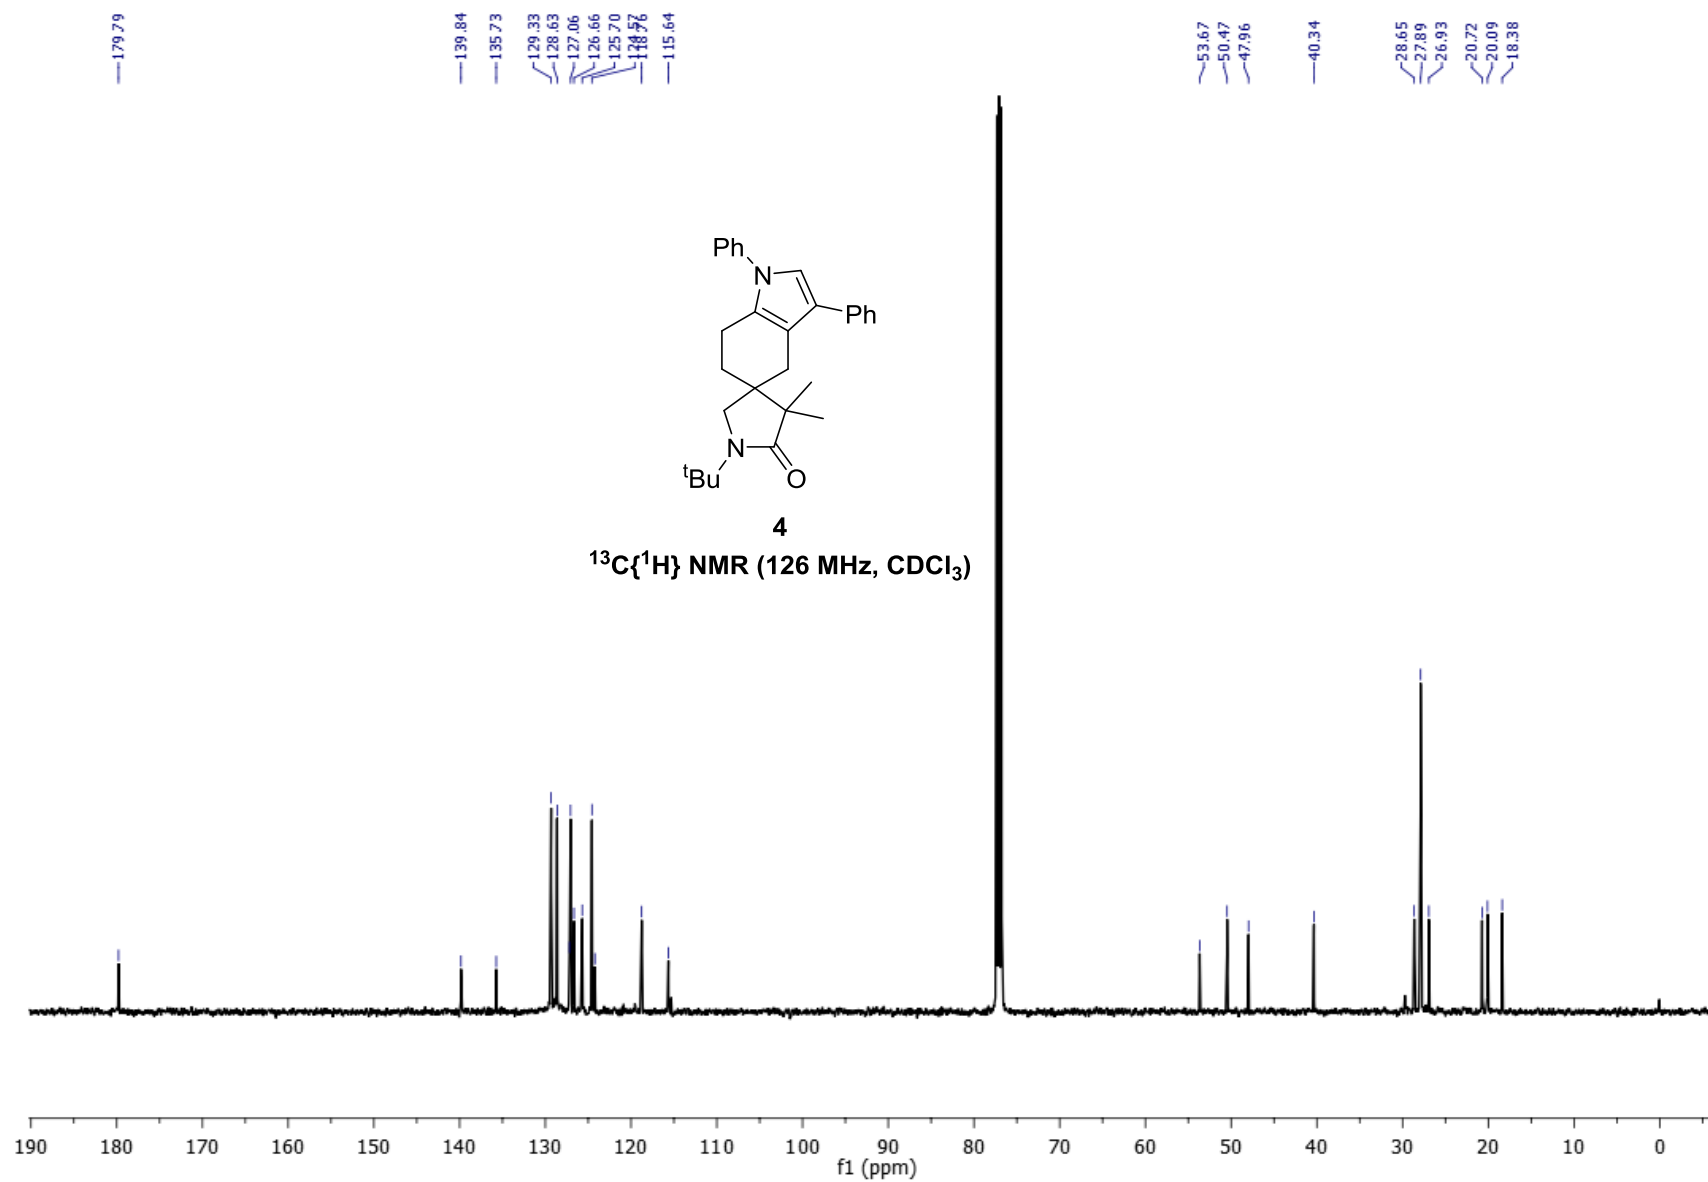

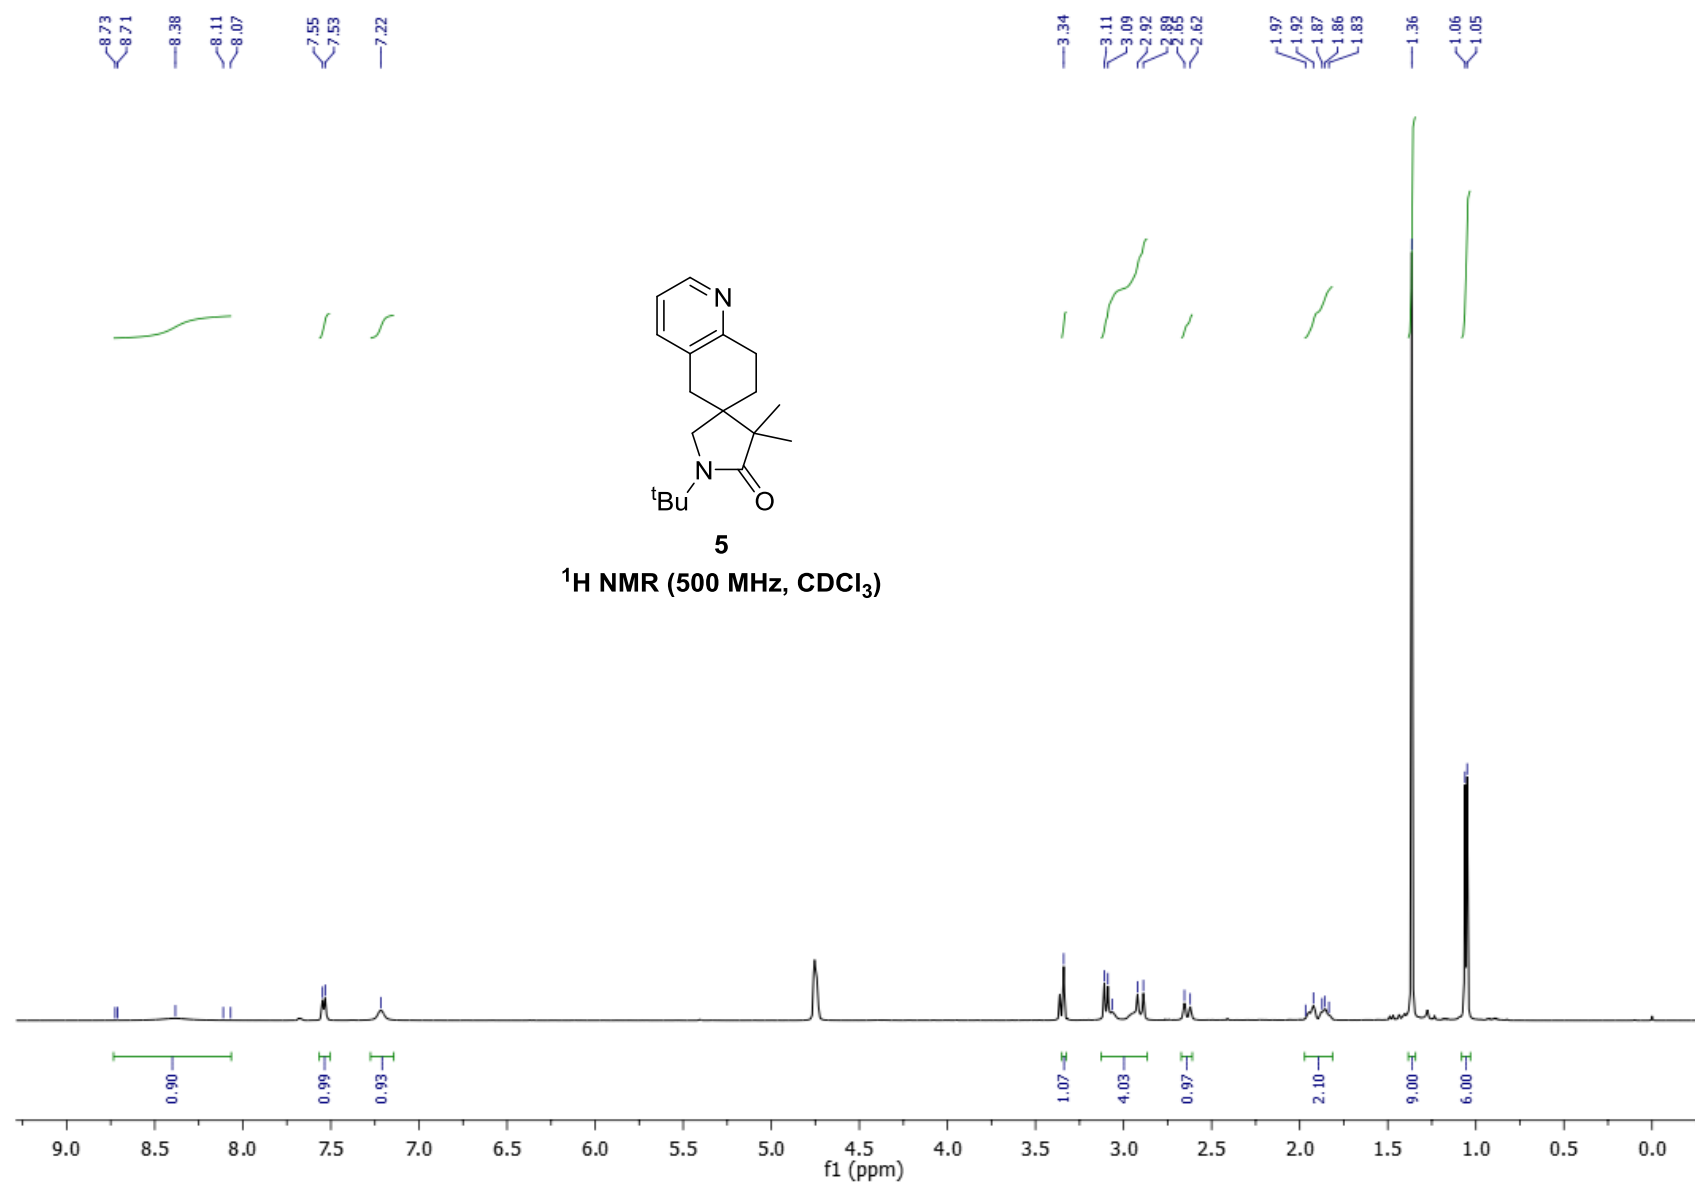

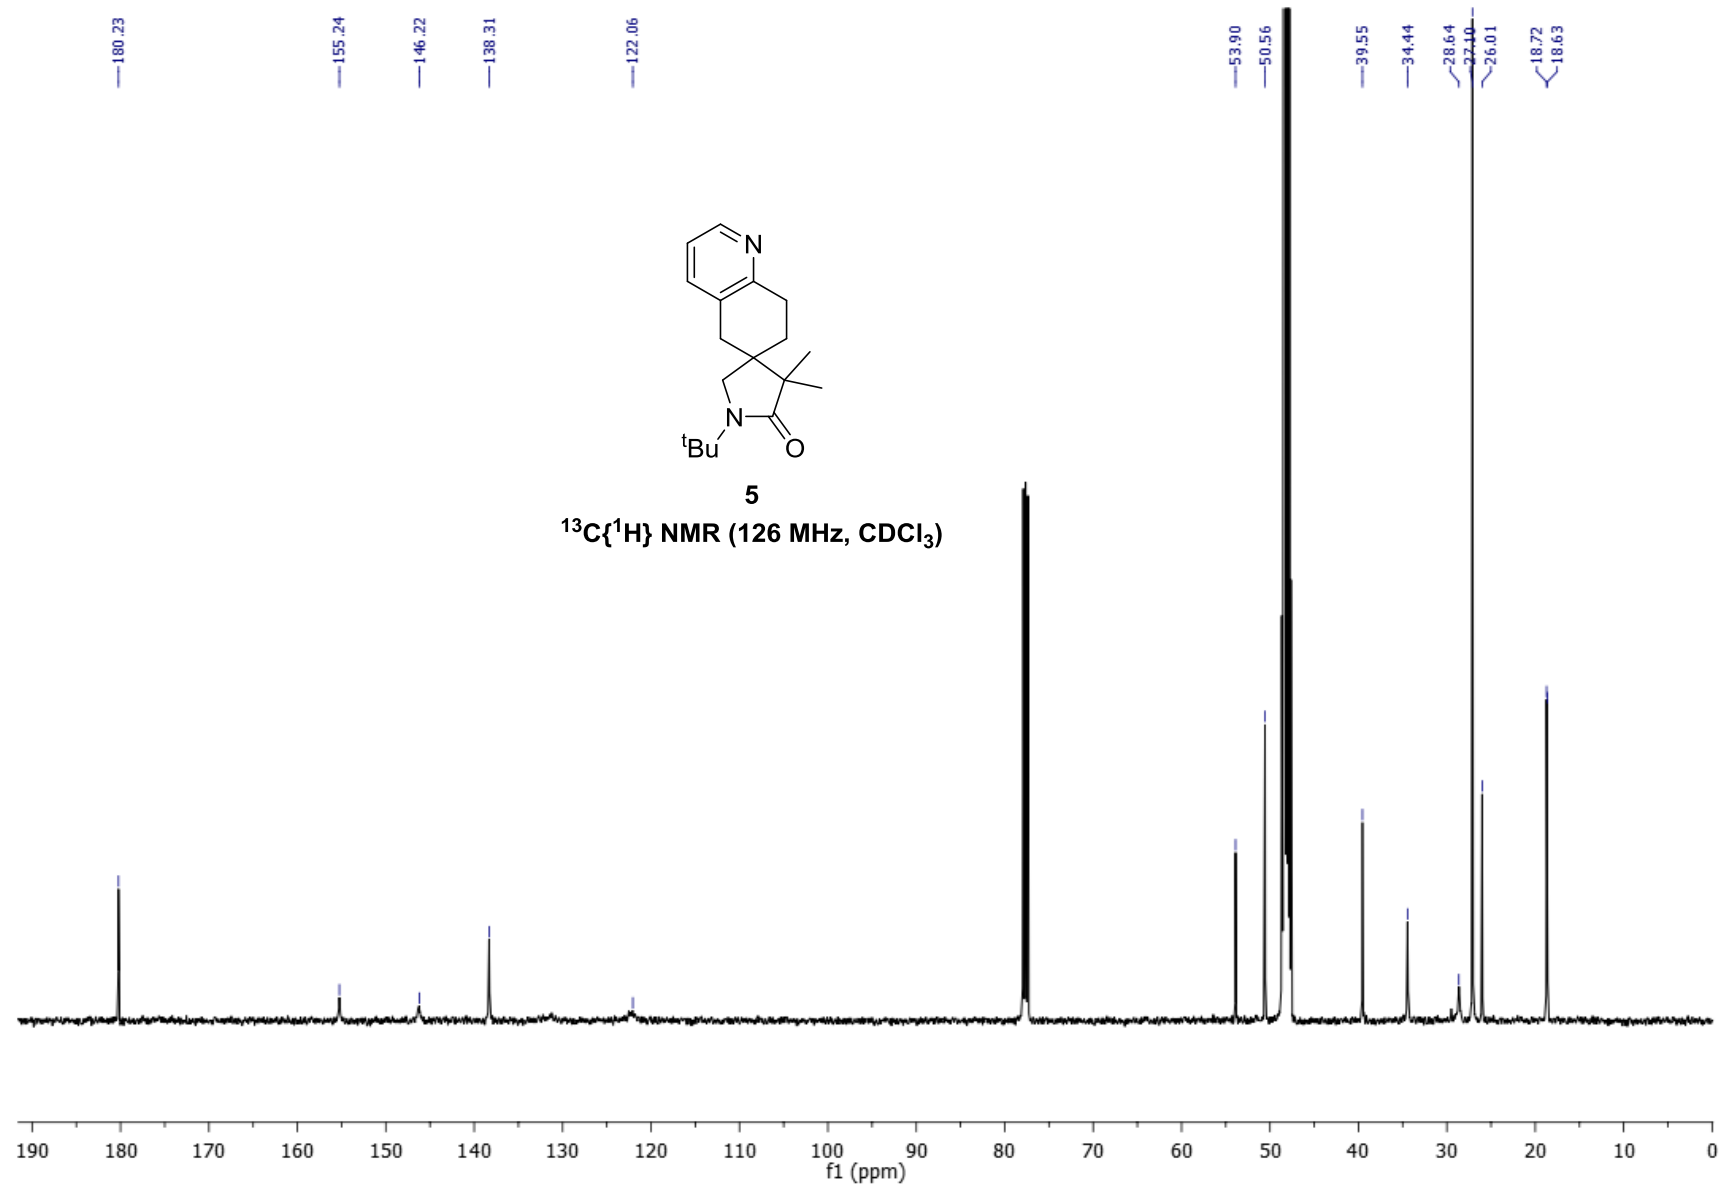

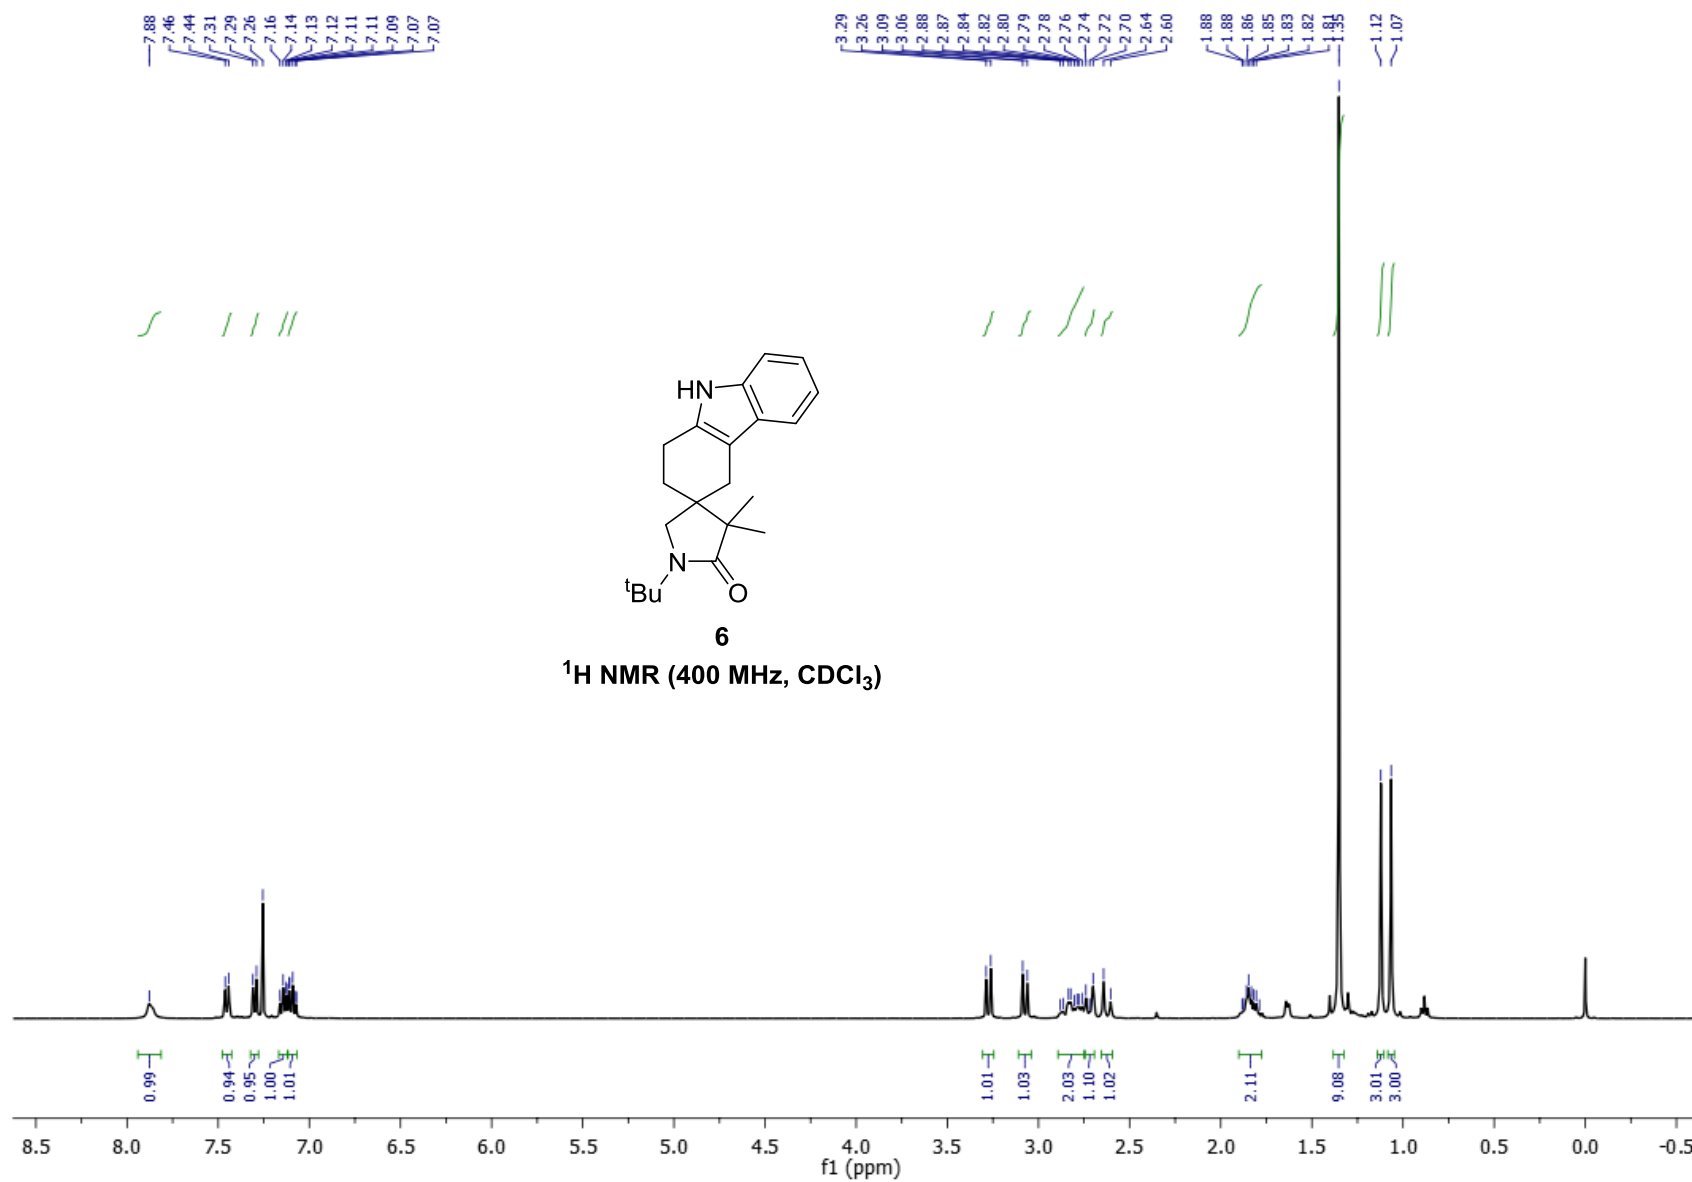

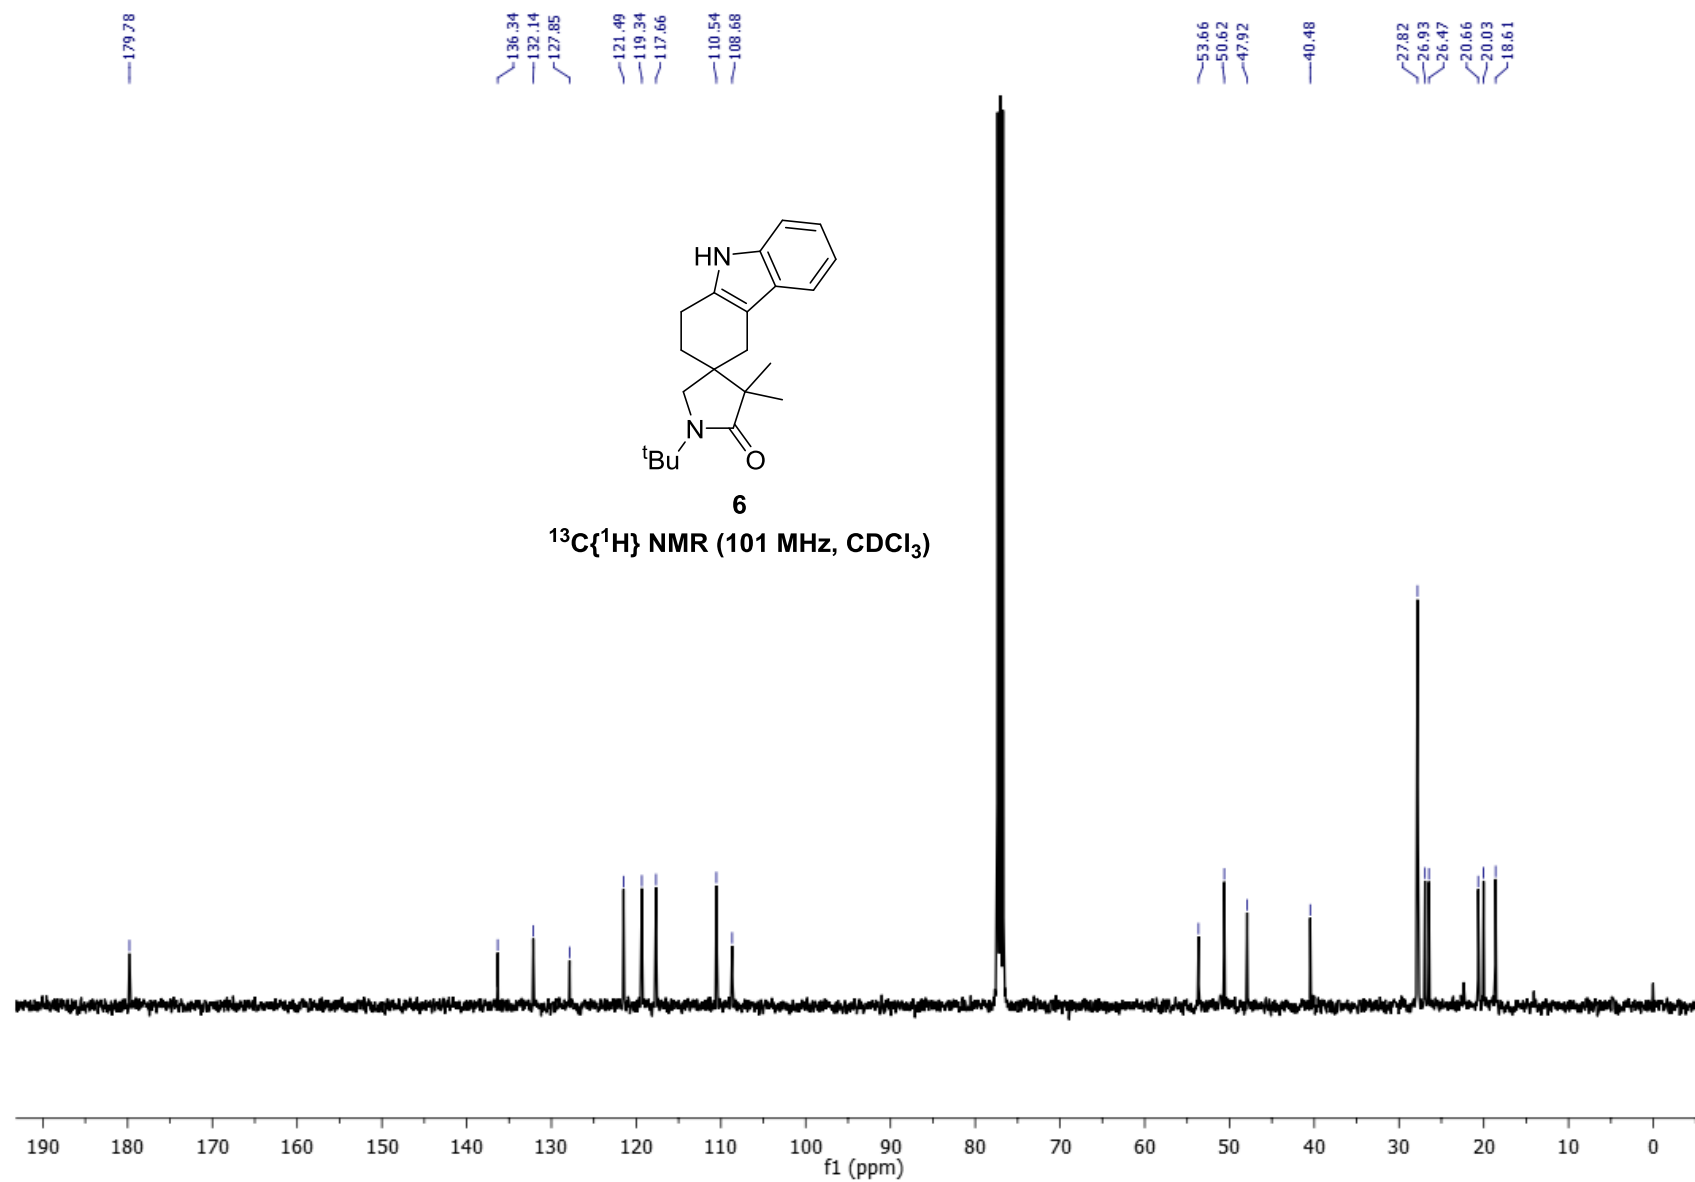

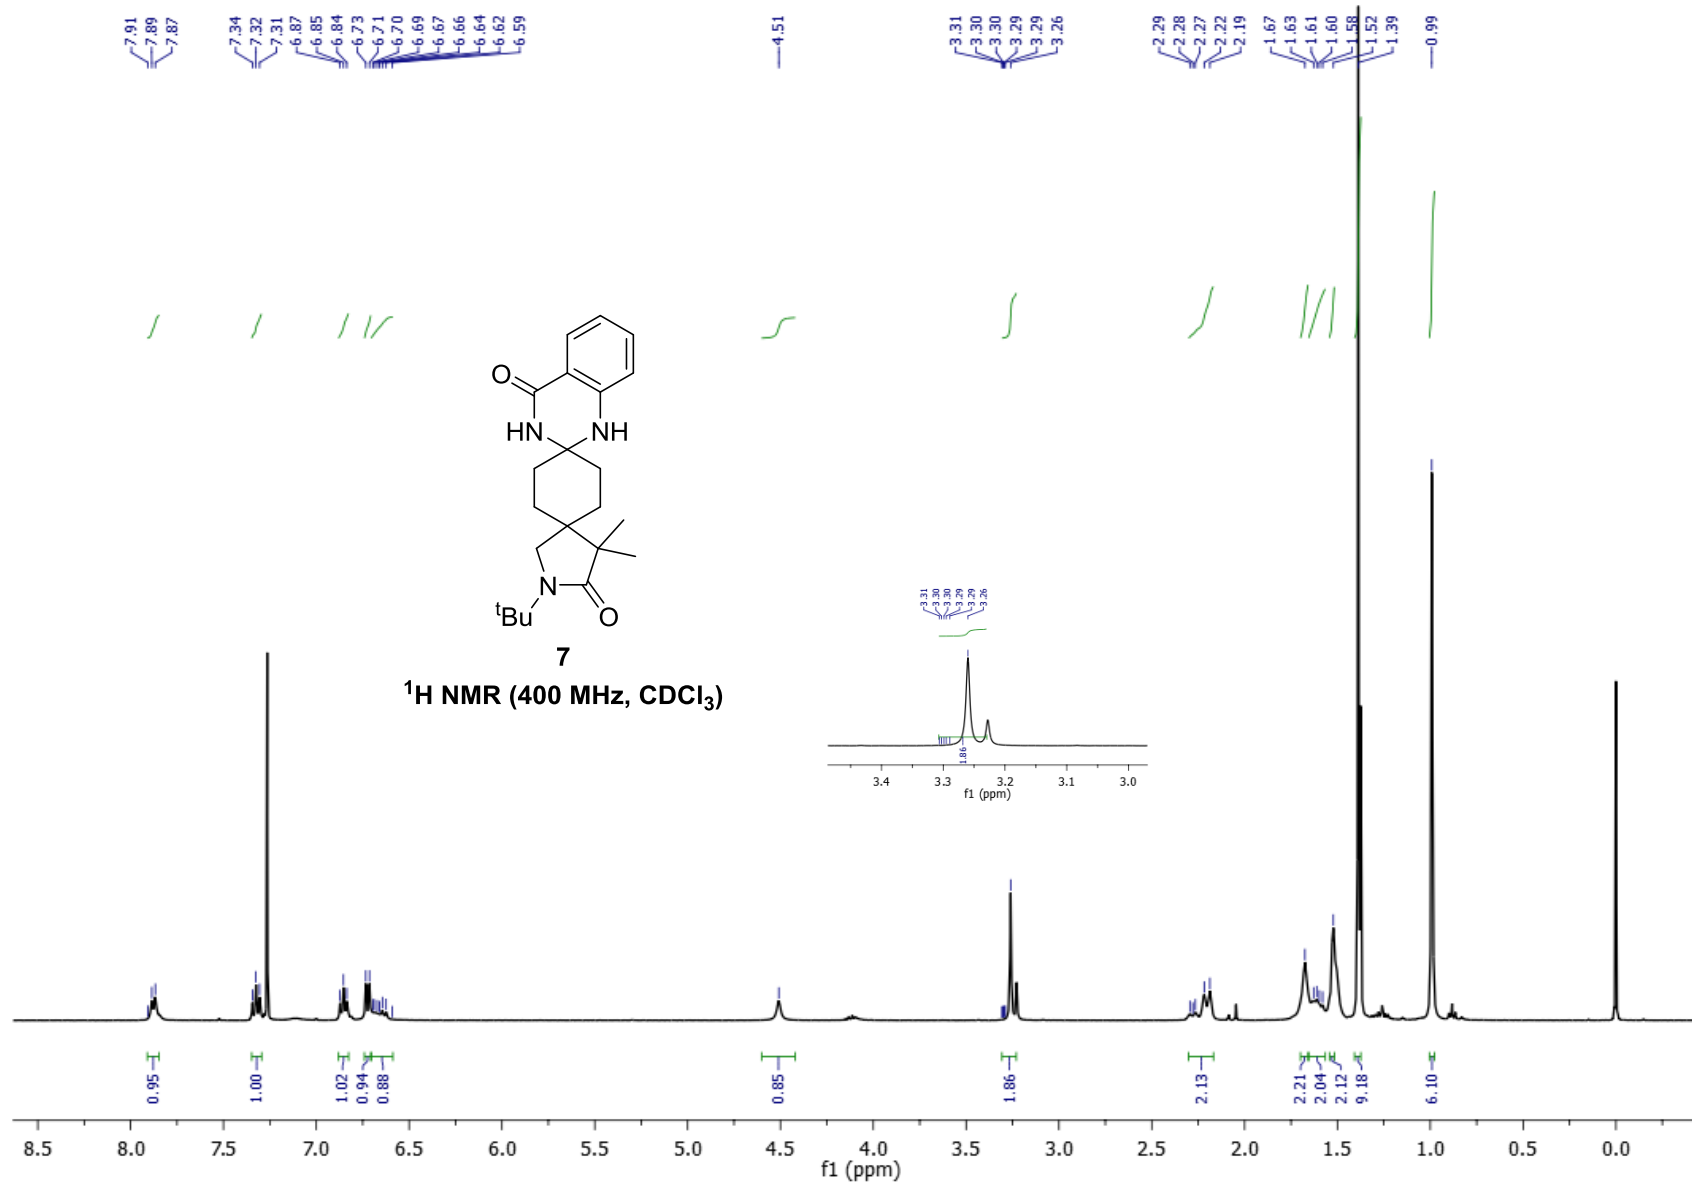

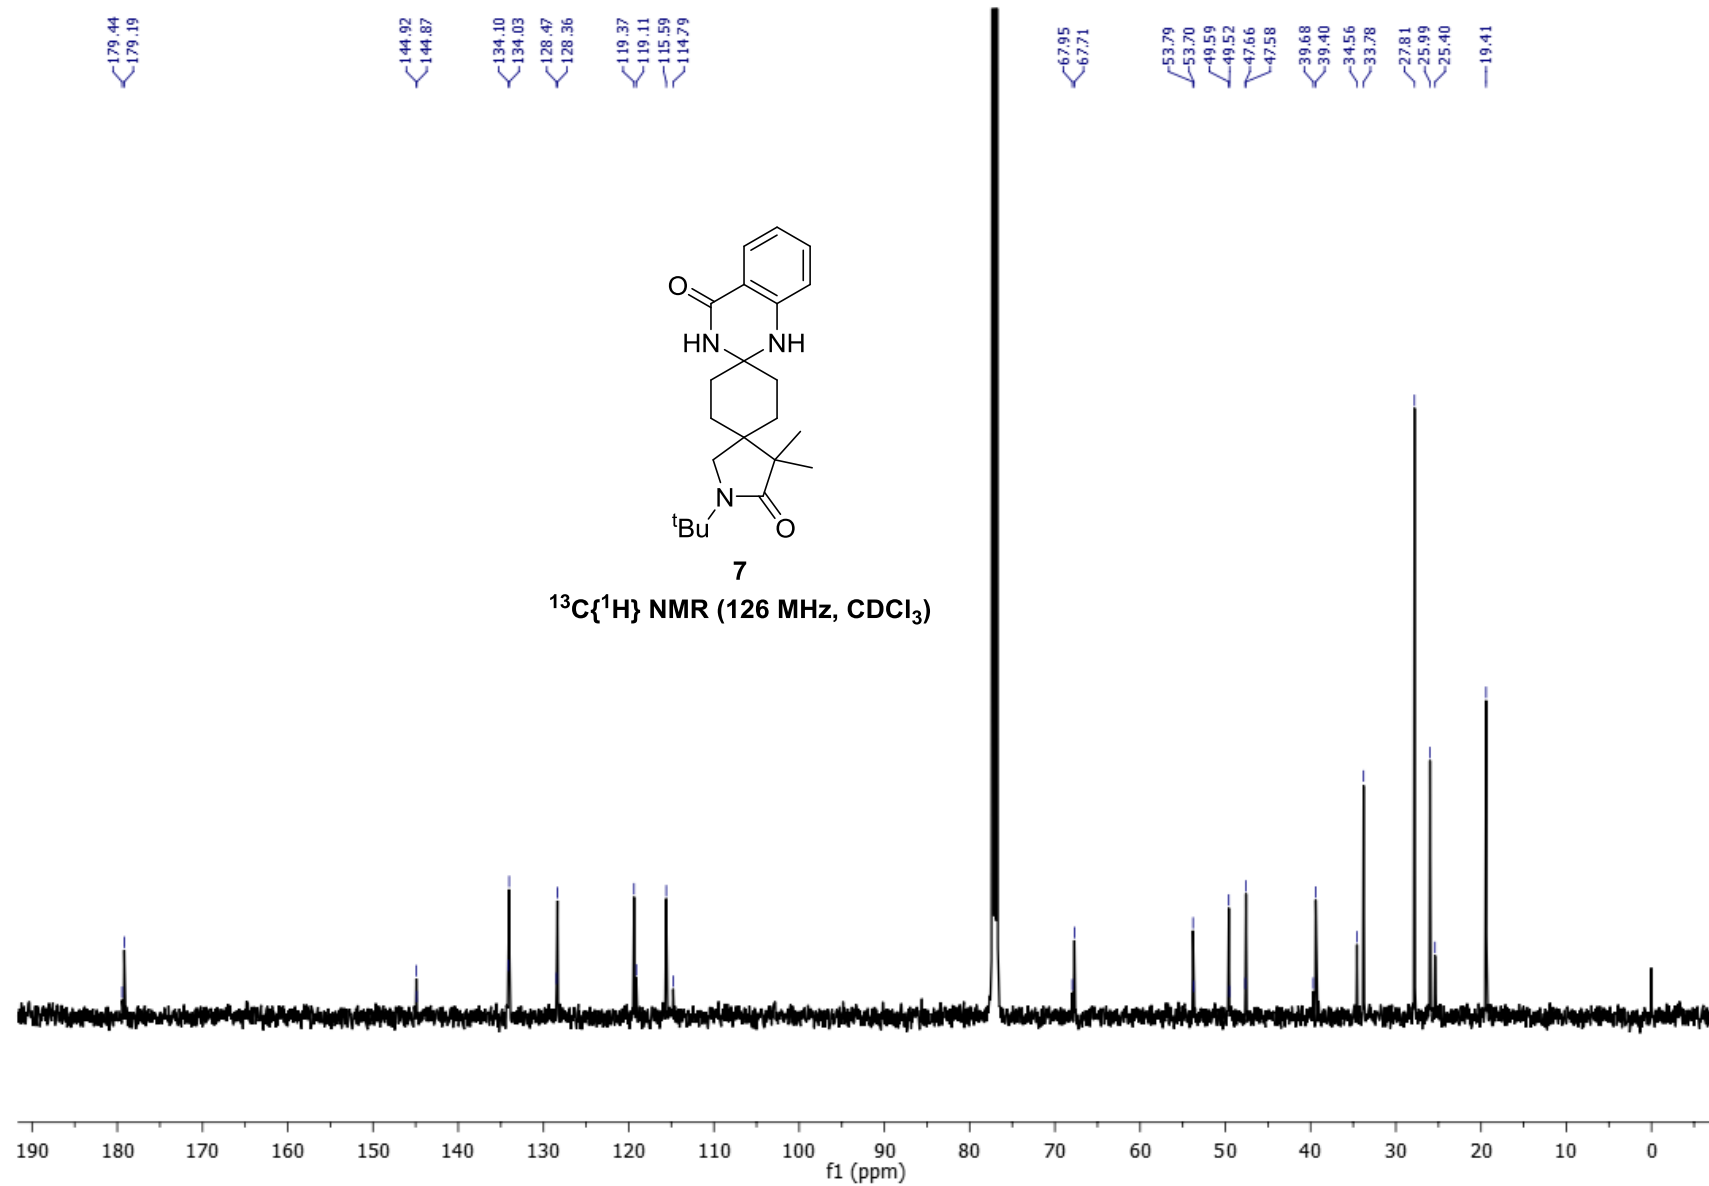

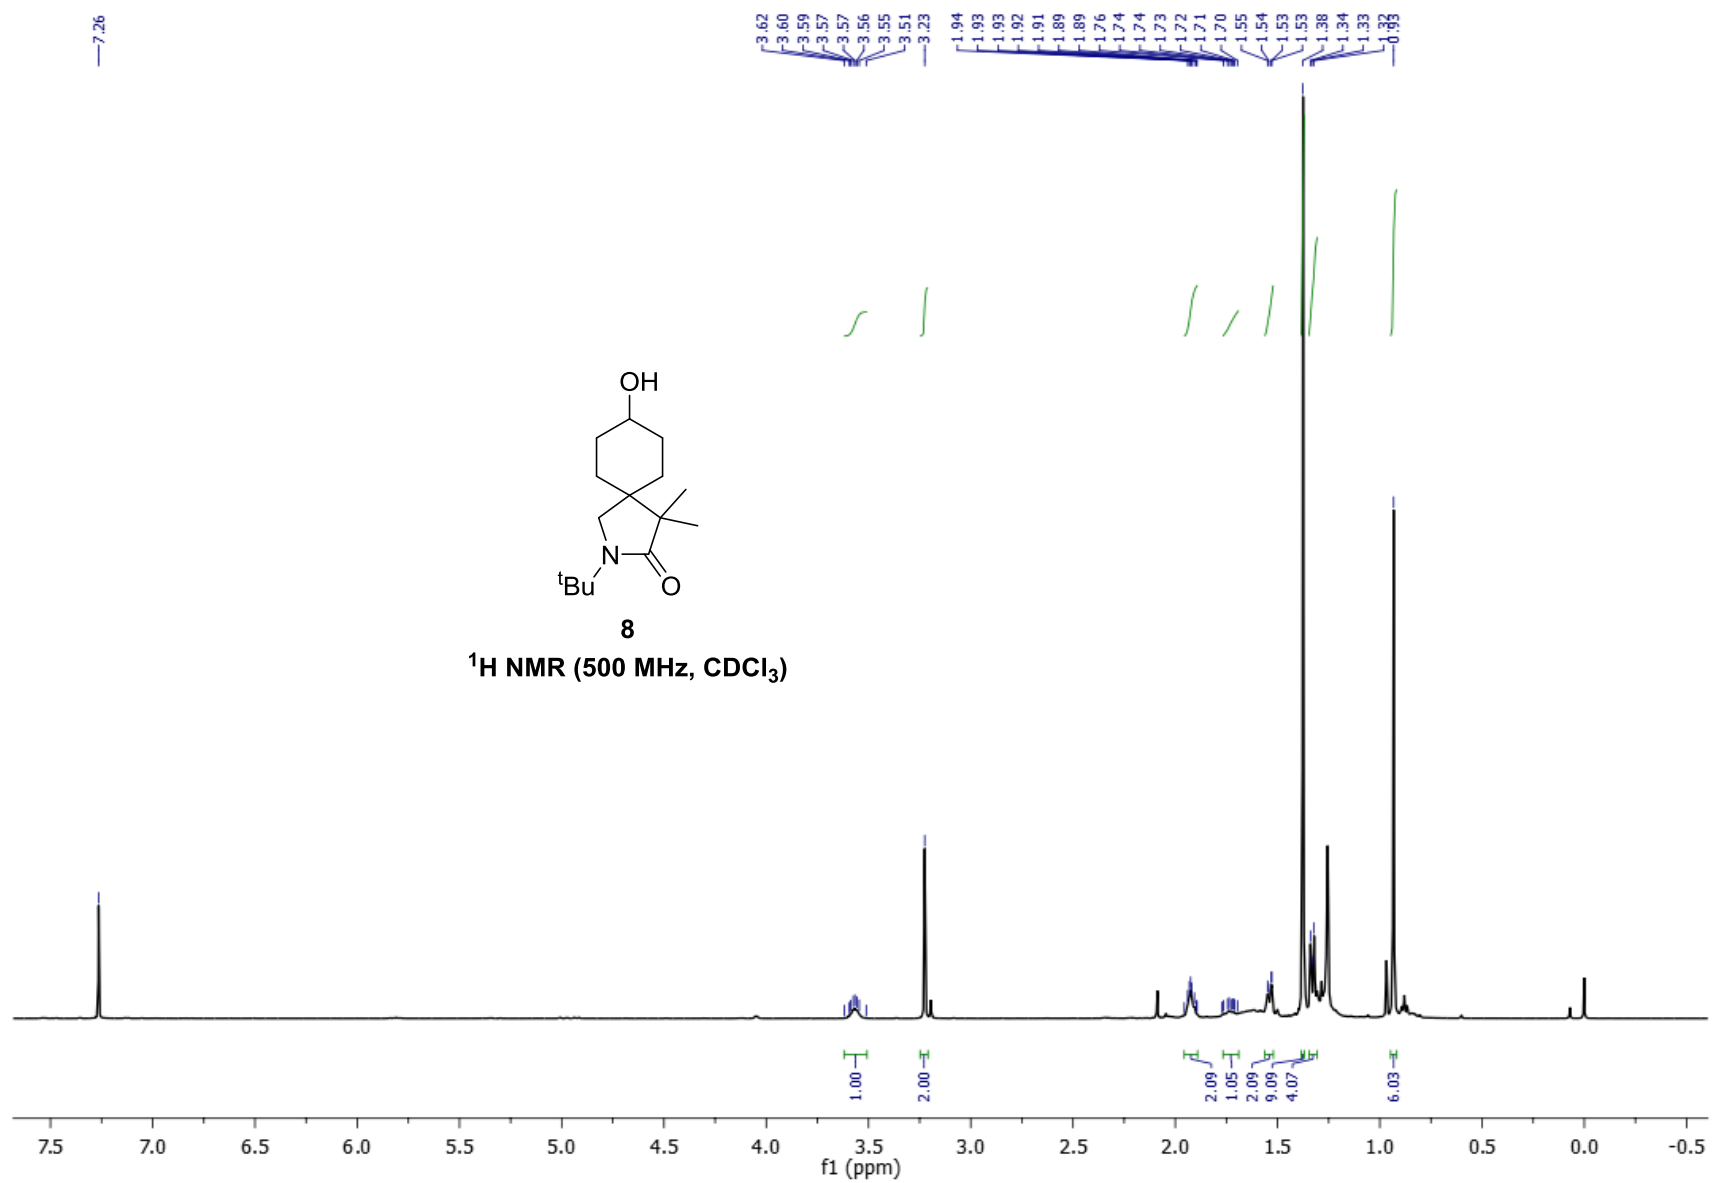

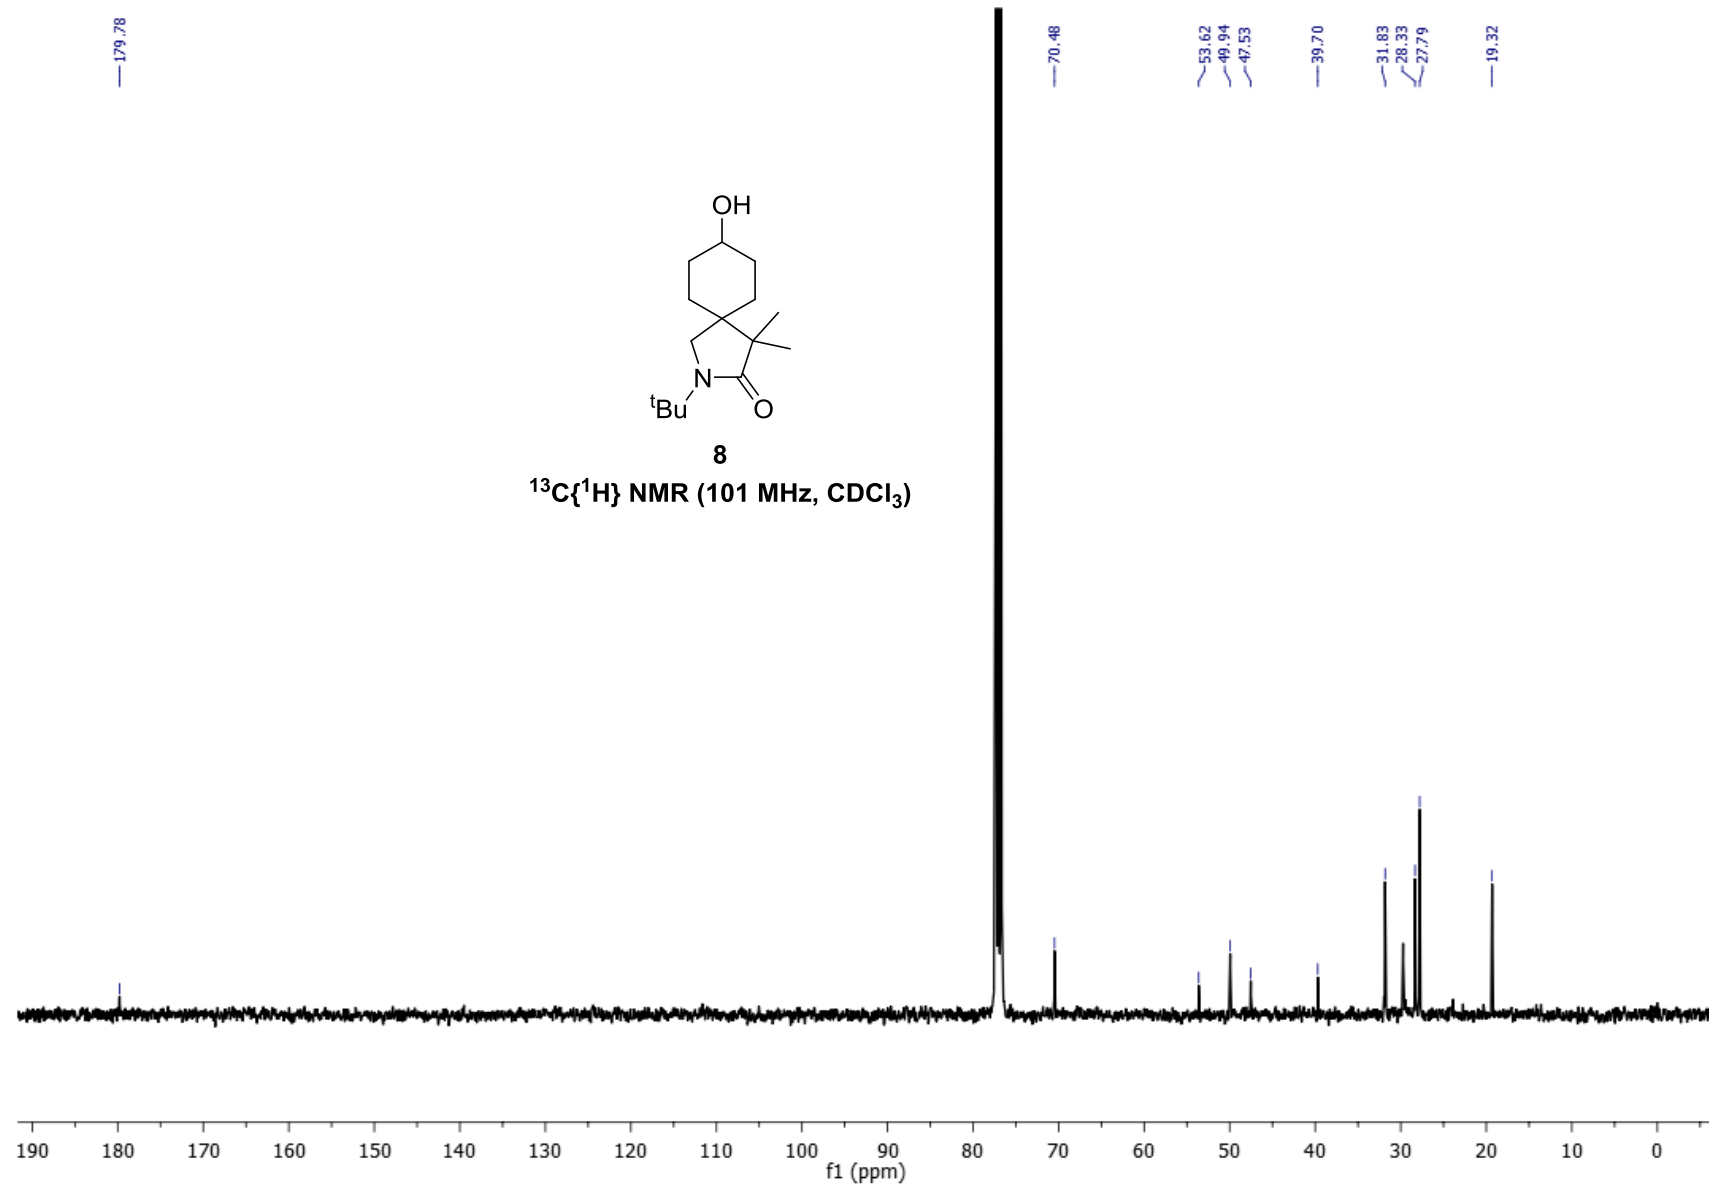

Supplement: d5ob01337b1.pdf [file d5ob01337b1.pdf]
